# Supplementary material for: Environmental outcomes of the US Renewable Fuel Standard
Source: PubMed Central journal article supplement (PMC8892349; doi:10.1073/pnas.2101084119), 2022-02-14
Supplement: pnas.2101084119.sapp.pdf [file pnas.2101084119.sapp.pdf]

1  
2  
3  
4  
5  
6  
7  
8  
9  
10  
11  
12  
13  
14  
15  
16  
17  
18  
19  
20  
21  
22  
23  
24  
25  
26

**Supplementary Information for**  
Environmental Outcomes of the U.S. Renewable Fuel Standard

Tyler J. Lark<sup>1\*</sup>, Nathan P. Hendricks<sup>2</sup>, Aaron Smith<sup>3</sup>, Nicholas Pates<sup>4</sup>, Seth A. Spawn-Lee<sup>5</sup>,  
Matthew Bougie<sup>1</sup>, Eric Booth<sup>6</sup>, Christopher J. Kucharik<sup>7</sup>, and Holly K. Gibbs<sup>5</sup>

\*Corresponding author: Tyler J. Lark  
Email: lark@wisc.edu

**This PDF file includes:**

- Supplementary Text (SI Materials and Methods)
- Supplementary Text (SI Results and Discussion)
- Figures S1 to S35
- Tables S1 to S23
- SI References

|    |                                                                                          |           |
|----|------------------------------------------------------------------------------------------|-----------|
| 27 | <b>Table of Contents</b>                                                                 |           |
| 28 | <b>Supplementary Text (SI Materials and Methods)</b> .....                               | <b>3</b>  |
| 29 | Estimating effects on crop prices.....                                                   | 3         |
| 30 | <i>Price model input – Estimated ethanol volumes</i> .....                               | 4         |
| 31 | <i>Price model development and estimation</i> .....                                      | 6         |
| 32 | Estimating effects on crop rotations .....                                               | 8         |
| 33 | <i>Crop rotation model input</i> .....                                                   | 8         |
| 34 | <i>Crop rotation model estimation</i> .....                                              | 9         |
| 35 | Estimating effects on cropland area .....                                                | 10        |
| 36 | <i>Cropland transitions model input</i> .....                                            | 11        |
| 37 | <i>Cropland transitions model development</i> .....                                      | 12        |
| 38 | <i>Cropland transitions model simulation</i> .....                                       | 14        |
| 39 | Estimating specific locations of change.....                                             | 14        |
| 40 | Estimating water quality impacts .....                                                   | 15        |
| 41 | <i>Agroecosystem model input – Soil texture and topography</i> .....                     | 16        |
| 42 | <i>Agroecosystem model input – Historical land-use/land-cover</i> .....                  | 17        |
| 43 | <i>Agroecosystem model input – Fertilizer and manure N and P application rates</i> ..... | 18        |
| 44 | <i>Agroecosystem model input – Irrigated extent</i> .....                                | 19        |
| 45 | Estimating greenhouse gas (GHG) emissions from land use change (LUC) .....               | 19        |
| 46 | Integrating models .....                                                                 | 20        |
| 47 | <i>Intensification – environmental effects of crop rotation changes</i> .....            | 20        |
| 48 | <i>Extensification – environmental effects of cropland area changes</i> .....            | 21        |
| 49 | Estimating uncertainty .....                                                             | 21        |
| 50 | <b>Supplementary Text (SI Results and Discussion)</b> .....                              | <b>24</b> |
| 51 | Supplementary results for price impacts .....                                            | 24        |
| 52 | Supplementary results for crop rotations.....                                            | 25        |
| 53 | Supplementary results for water quality impacts from crop rotations .....                | 27        |
| 54 | Supplementary results for cropland area .....                                            | 28        |
| 55 | Supplementary results for water quality impacts of cropland area.....                    | 30        |
| 56 | Supplementary results for greenhouse gas (GHG) emissions from land use change (LUC) .... | 31        |
| 57 | <b>Figs. S1-S35.</b> .....                                                               | <b>35</b> |
| 58 | <b>Tables S1-S23.</b> .....                                                              | <b>70</b> |
| 59 | <b>SI References</b> .....                                                               | <b>93</b> |
| 60 |                                                                                          |           |
| 61 |                                                                                          |           |

62 **Supplementary Text (SI Materials and Methods)**

63 We estimated the impacts of the 2007 U.S. Renewable Fuel Standard (RFS) on  
64 environmental outcomes by linking a series of empirical and explanatory models. First, we  
65 estimated the effects of the RFS on the prices of corn, soybeans, and wheat. We then simulated,  
66 using independent models, the responses of crop rotations and total cropland area to the  
67 changes in prices. Using those estimated changes, we quantified environmental outcomes,  
68 employing several models specific to nitrous oxide emissions, carbon emissions, nutrient losses,  
69 and water quality indicators. We describe the methods developed for each model component  
70 below, followed by the approaches used to integrate the models and estimate uncertainty.

71 Estimating effects on crop prices

72 We assessed the effects of the RFS on U.S. corn, soybean, and wheat prices by  
73 comparing observed market prices to a counterfactual business-as-usual scenario (BAU) without  
74 the expanded 2007 RFS, where BAU ethanol production satisfies only the volume required by the  
75 initial 2005 Renewable Fuel Standard — equivalent to the amount needed to meet standards for  
76 reformulated gasoline under the 1990 Clean Air Act. Our analysis therefore estimates the effects  
77 of the 2007 expansion of the RFS program above what would have otherwise likely occurred to  
78 meet demand for ethanol as an oxygenate. Prior to 2007, ethanol use was driven by the  
79 oxygenate requirement, which mandated beginning in the 1990s that oxygenate additives be  
80 blended into gasoline in regions prone to poor air quality. At first, methyl tert-butyl ether (MTBE)  
81 was used as the oxygenate additive, but when it was found to pollute waterways, ethanol  
82 replaced it. The initial RFS in 2005 essentially translated the oxygenate requirement into a  
83 volume mandate. See the section in Carter *et al.* (2017) titled Incremental Effect of RFS2 on  
84 Ethanol Production for further details (1).

85 Our approach closely follows that of Carter *et al.* to account for competing shocks in  
86 demand due to changes in inventory, weather, and external markets (1) and extends the work to  
87 estimate the impacts of the RFS on soybean and wheat prices. It also incorporates the policy as a  
88 persistent shock to agricultural markets rather than a transitory shock, whose price impacts are  
89 different. Specifically, we base our approach on the competitive rational storage model, which is  
90 the staple of the literature on the prices of storable commodities (2). Storage is a key feature of  
91 these markets because it allows prices to respond differently to a short-lived shock than to a long-  
92 lived shock. If there is a one-year demand increase, then market participants can draw down  
93 inventory and mitigate the price impact; they can replenish inventories in later years. However, a  
94 permanent demand increase cannot be met by drawing down inventory.

95 Carter *et al.* (2017) show in their Figure 3 and equations (9)-(11) the three fundamental  
96 equations of the storage model:

- 97 (i) Inventory Supply, i.e., amount of grain this year's market is willing to put into  
98 storage as a function of price.  
99 (ii) Inventory Demand, i.e., amount of stored grain next year's market is expected to  
100 demand as a function of price.  
101 (iii) Supply of Storage, i.e., the price at which storage firms are willing to store as a  
102 function of inventory quantity.

103 The empirical model is a partially identified vector autoregression (VAR) that estimates  
104 these three fundamental equations. The model also includes a fourth variable (index of real  
105 economic activity) to account for the role of global commodity demand in driving price cycles (3).

106 We follow Carter *et al.* by specifying the VAR using the following three assumptions to  
107 account for the endogeneity of prices and inventory (1). First, shocks to the relevant commodity  
108 market (corn, soybeans, or wheat) do not affect real economic activity within the same year.  
109 Second, the marginal cost of grain storage does not depend on the commodity price. Third, the  
110 short-run (within-year) elasticity of demand for the commodity is as estimated in Adjemian and  
111 Smith (2012)(4). Carter *et al.* also show that replacing the third assumption with the following  
112 three assumptions has little effect on the estimates: (i) short-run elasticity of demand for current  
113 use exceeds  $-0.1$  in absolute value; (ii) inventory-to-use ratio never exceeds 0.4, which is the  
114 sample maximum; and (iii) the elasticity of next year's net supply is not less than the elasticity of  
115 current net supply. These assumptions which we adopt as well are further described in Carter *et al.*  
116 *in the subsection titled "VAR Model and Identification" (1).*

117 In a VAR, any data that do not fit the equations exactly contain an error, or shock. These  
118 shocks represent shifts in the relevant curve. The RFS implies shocks to both inventory supply  
119 and demand; it constitutes both a reduction in inventory supply and an increase in inventory  
120 demand. If we were to set the inventory supply and demand shocks to zero, then we could solve  
121 the model for a counterfactual BAU price in the absence of any shocks to those equations.

122 Instead, we define the counterfactual BAU scenario to include shocks to production for  
123 each commodity. For soybeans, we also allow shocks to soybean imports by China, as explained  
124 below. We incorporate these shocks as described in equation (27) of Carter *et al.* (2017). To  
125 measure these shocks, we use the difference between actual production and imports and the  
126 World Agricultural Supply and Demand Estimates (WASDE) that are made in May of each year.  
127 The May WASDE report is the first one released in each crop year.

128 In the subsequent subsections, we describe our model input and background  
129 assumptions related to ethanol production volume and demand, crop production and demand,  
130 and our price model specification and estimation.

### 131 *Price model input – Estimated ethanol volumes*

132 Carter *et al.* (2017) estimate that the 2007 RFS increased mandated ethanol use by 5.5  
133 billion gallons (20.8 GL) per year (1). This is further illustrated by Fig. S7, which shows mandated  
134 and actual ethanol production since 2000 beside projections made by the United States  
135 Department of Agriculture (USDA) in February 2006 and February 2007. The difference between  
136 the 2005 and 2007 RFS mandates began at 3.6 bgal (13.6 GL) of ethanol in 2008. It rose to 4.4  
137 bgal (16.7 GL) in 2009 and averaged 5.4 bgal (20.4 GL) in 2010-12.

138 In February 2006 the USDA projected that ethanol production would be quite similar to  
139 the 2005 standard. As noted earlier, this level would meet the oxygenate standard for  
140 reformulated gasoline under the Clean Air Act. However, a boom in ethanol production capacity  
141 occurred in 2006. By the end of that year, enough ethanol production capacity was under  
142 construction to more than double production. To reflect this building boom and the forthcoming  
143 RFS expansion, the USDA's February 2007 projections jumped above its February 2006

144 projections. The anticipated increase in future corn demand from the ethanol industry incited  
145 corn producers to store corn to receive higher prices. For this reason, we measure the effect of  
146 the 2007 RFS on grain markets beginning in late 2006.

147 The RFS also requires increased biodiesel use. Our approach to estimating the price  
148 effects captures any effects of biodiesel on crop prices. However, we expect the effect of  
149 biodiesel on soybean prices to be small. Half of U.S. soybeans are exported whole. By weight,  
150 about 80% of each domestic bean becomes meal and the other 20% becomes oil. Of this oil,  
151 30% was used to make biodiesel in 2017, or about 3% of the weight of U.S. soybeans. Another  
152 reason we expect the effect of biodiesel on soybean prices to be small is that soybeans produce  
153 oil and meal in fixed proportions. An increase in demand for oil means the market gets more meal  
154 than it wanted, which lowers the price of meal thereby mitigating the effect on soybean prices.

155

156 *Price model input – Corn, soybean, and wheat production*

157 The RFS affected corn, soybean and wheat markets in two major ways. First, the  
158 mandated increase in ethanol production created additional demand for corn, since nearly all  
159 ethanol used in the U.S. is produced from corn. Second, increased demand for corn causes  
160 farmers to plant more corn, leaving less land available for other crops. This in turn reduced the  
161 supply of soybeans and wheat, causing these prices to increase as well.

162 Production of corn, soybeans and wheat occupies about two-thirds of U.S. cropland. The  
163 top panel of Fig. S8 shows harvested area of these three crops since 1995. In the mid-90s, these  
164 crops occupied similar amounts of land. Since then, corn and soybean area has increased and  
165 wheat area has declined. Corn area increased by 24% in 2007 as the expansion in the RFS  
166 loomed. Much of this increase was in central Corn Belt states such as Iowa, Illinois and Indiana,  
167 where corn is typically rotated with soybeans (5). After some reversion towards the mean in 2008,  
168 corn area remained high and then trended upward. From 2001-05, average corn area was 1%  
169 below soybean area. From 2006-10, average corn area exceeded soybean area by 8%. Soybean  
170 area recovered in the later years in response to increased demand for exports to China.

171 The bottom panel of Fig. S8 shows a steady increase in corn production, aside from the  
172 2012 drought, which affected corn production much more than soybeans or wheat. Soybeans  
173 produce fewer bushels per unit of area than corn and wheat, but soybean production increased  
174 steadily throughout the sample period; it increased from 2.2 billion bushels in 1995 to 4.4 billion  
175 bushels in 2017. Wheat has steadily become less prevalent. Between 1995 and 2017, wheat area  
176 declined by 38%. Wheat production declined 20% during the same period because increasing  
177 yields offset some of the area decline.

178 Figure S9 shows the rates of use for corn, soybeans, and wheat in the U.S. since 1995.  
179 For corn, the dominant change reflects the increase in ethanol use. About one-third of each corn  
180 kernel that enters an ethanol plant is recycled as dried distillers grains (DDG), which are used for  
181 animal feed and have a price similar to corn grain. The other two-thirds of the kernel — the starch  
182 — is converted to ethanol. Fig. S9 displays these two components separately; the black area in  
183 the figure (denoted “ethanol”) is the net amount of corn used for ethanol. The amount of corn  
184 used directly for food is relatively constant over the period. With the exception of the 2012

185 drought year, the quantity exported is also relatively stable. Note that the food category for corn  
186 and wheat also includes seed and industrial uses, and that these two categories are included in  
187 the residual category for soybeans.

188 Soybean exports grew by a factor of 2.5 between 1995 and 2017. By 2017 half of all U.S.  
189 soybeans were exported. Much of this demand came from China, which consumed 22% of the  
190 world's soybeans in 2017, up from 8% in 1995. This increase in demand for soybeans created  
191 upward pressure on soybean prices in addition to the pressure from the RFS.

192 Almost all domestically consumed soybeans are crushed (processed into oil and meal)  
193 before use. Soybean meal is used predominantly as animal feed and oil is used for human  
194 consumption or to make biodiesel. By weight, about 80% of each bean becomes meal and the  
195 other 20% becomes oil. Since most of the soybean becomes meal and half of soybeans are  
196 exported, the proportion of U.S. soybeans by weight that end up as oil is small, as illustrated in  
197 Fig. S9. Soybean oil prices typically run about double meal prices, so while biodiesel would be  
198 more prominent by dollar value rather than by weight, it remains a relatively minor source of  
199 income for soybean producers.

200 Most wheat is either exported or used domestically for food, with a small amount  
201 employed as animal feed. The quantity used for food is relatively constant from year to year. This  
202 suggests that exports and animal feed demand are relatively more elastic and that it is these  
203 areas that adjust to accommodate fluctuations in production.

204 The price of corn increased by about 50% in fall 2006 and has remained at or above that  
205 level since (Fig. S10). In the first five years after the RFS signal hit the markets (Sept 2006 – Aug  
206 2011), corn prices were up 77%, soybean prices up 62%, and wheat prices up 62% relative to the  
207 last five pre-RFS years (Sept 2001–Aug 2006).

208 To ascertain how much of these price increases can be attributed to the RFS, we  
209 estimated a model that controls for other factors including the business cycle, global commodity  
210 demand, and yield fluctuations. All prices spiked around the 2008 commodity boom for reasons  
211 related more to the business cycle and global commodity demand than to the RFS. Prices spiked  
212 again in 2010-12 as relatively poor yields, especially for corn, coincided with high demand for  
213 biofuels and for soybean exports to China. Prices came back from these peaks after the 2012  
214 drought. In summary, the three largest trends in the markets for corn, soybeans, and wheat after  
215 2006 were higher prices, increased corn use for ethanol, and increased soybean exports.

## 216 *Price model development and estimation*

217 We apply the method in Carter *et al.* (2017), which uses a partially identified structural  
218 vector autoregression model to estimate the effect of the RFS on corn prices (1). Here, we update  
219 the corn model with data through the 2016-17 crop year, and we also apply the model to  
220 soybeans and wheat.

221 Our model incorporates the fact that the RFS is a persistent rather than transitory shock  
222 to agricultural markets. This distinction is important because persistent shocks have larger price  
223 effects than transitory shocks. The market can respond to a transitory shock, such as poor  
224 growing season weather, by drawing down inventory. This action mitigates the price effect. A

225 persistent shock, such as an increase in current and expected future demand, cannot be  
226 mitigated by drawing down inventory. To identify these two types of shocks, the model uses data  
227 on inventory levels and on the term structure of futures prices.

228 Table S4 summarizes the data used to estimate the model. It includes global real  
229 economic activity, which has been shown to be an important driver of commodity prices (3). To  
230 represent global economic activity, we use the index developed by Kilian (2009) from dry-cargo  
231 shipping rates (1, 6). As Kilian emphasizes, “the proposed index is a direct measure of global  
232 economic activity which does not require exchange-rate weighting, which automatically  
233 aggregates real economic activity in all countries, and which already incorporates shifting country  
234 weights, changes in the composition of real output, and changes in the propensity to import  
235 industrial commodities for a given unit of real output” (pg. 1056) (6).

236 The timeline at the bottom of Table S4 shows when the variables are measured. We  
237 measure inventory ( $I$ ) at the end of the crop year. The real economic activity index ( $X$ ), the futures  
238 price ( $F$ ), and the spot price ( $S$ ) are all measured at the same point in the middle of the crop year,  
239 i.e., in March, which is after the previous crop has been harvested and before the new crop is  
240 planted. Winter wheat is the exception, as it is planted late in the fall of the previous year. The  
241 arrow indicates that the futures price is the contract for delivery in November or December, which  
242 is after the next harvest.

243 Following (1), we use the futures and spot prices to compute the convenience yield,  
244 which is essentially the spot price minus the futures price. In computing the convenience yield, we  
245 also adjust the spread for interest and warehousing costs as in equation (13) of (1). Convenience  
246 yield provides crucial information for identifying the differing effects of transitory and permanent  
247 shocks. For example, in response to poor growing season weather, the spot price increases and  
248 inventory decreases, but the futures price does not increase much because traders understand  
249 that supplies will be replenished by the new harvest before the futures contract delivers. In such  
250 cases, the convenience yield increases. In contrast, persistent shocks such as the RFS cannot be  
251 met by drawing down inventory, so spot and futures prices increase by similar amounts and the  
252 convenience yield does not increase. Observing both the spot and futures price allows them to be  
253 identified separately, whereas observing only one price for a commodity does not.

254 Unlike corn and soybeans, which are relatively homogeneous, there are several classes  
255 of wheat produced in the United States. They vary according to where they are grown, the  
256 growing season, hardness, and protein content. Hard red winter wheat (HRW) makes up 40-45%  
257 of production in a typical year. It is grown mostly in and around Kansas, and is planted in the fall  
258 for harvest in early summer. Hard red spring wheat (HRS) makes up about 25% of production in a  
259 typical year and is considered the highest quality class due to its high protein content. It is grown  
260 in the Northern Plains states, and is planted in the spring for harvest in late summer. Soft red  
261 winter wheat (SRW) provides about 20% of production and most of the rest is white wheat.  
262 Robust futures markets exist for HRW in Kansas City, HRS in Minneapolis, and SRW in Chicago.  
263 The SRW futures market has a long history and remains the most actively traded, even though it  
264 lags behind the other two in production. The HRW and HRS futures markets are newer and have  
265 reported viable prices only since the late 1970s. In our analysis, we use SRW prices until March  
266 1976, after which we switch to HRW and HRS futures prices. The results are the same if we  
267 instead use a weighted average of the three prices after 1976.

268 Estimating the incremental effect of the RFS requires an estimate of ethanol use that  
269 would have occurred in the absence of the RFS. This business-as-usual amount depends on  
270 factors that are difficult to quantify, including the true value of ethanol to the fuel industry and the  
271 extent to which, by guaranteeing demand for ethanol, the RFS caused large capital investment in  
272 ethanol plants and fueling infrastructure. Thus, rather than estimate the BAU ethanol quantity  
273 directly, we estimate the difference between the BAU and observed quantities. For price  
274 estimates of each commodity, we follow (1) and fit the model using data prior to the 2006 crop  
275 year and use them to project business-as-usual (BAU) prices that would have occurred after 2006  
276 in the absence of the RFS.

277 To assess the model fit, we compute the Corrected Akaike Information Criterion (AIC<sub>c</sub>)  
278 and Bayesian Information Criterion (BIC), and we evaluate the impulse response functions for  
279 concordance with economic theory. We generate confidence intervals for the impulse response  
280 functions using a recursive-design wild bootstrap with 10,000 replications (7). For each bootstrap  
281 draw, we estimate the identified parameter set and the range of impulse responses defined by  
282 that set. We keep only draws that satisfy our identification conditions. This exercise produces  
283 10,000 bootstrap draws for both the estimated lower and upper bounds of the identified set. For  
284 this component of the price impact analysis we set the lower limit of the confidence interval equal  
285 to the 0.05 quantile across draws of the estimated lower bound and the upper limit as the 0.95  
286 quantile across draws of the estimated upper bound. This interval, as reported in Figs. S13 and  
287 S16, covers the identified set with probability 0.90, because 90 percent of the estimated  
288 parameter sets lie entirely inside it.

289 We estimate business-as-usual prices by simulating from the model what prices would  
290 have been if the markets had experienced the same shocks to (i) real economic activity, (ii) U.S.  
291 production, (iii) Chinese soybean imports, and (iv) the supply of grain storage that we  
292 experienced post-2006, but no other shocks. The average difference between observed prices  
293 and these simulated BAU prices provides an estimate of how much the RFS affected prices.  
294 Although Garcia *et al.* (2015) show significant decreases in convenience yield since 2006,  
295 especially for wheat (8), allowing observed post-2006 convenience yield shocks (supply of  
296 storage) to enter the BAU simulation reduces the estimated effect of the RFS on wheat prices by  
297 only two percentage points.

## 298 Estimating effects on crop rotations

299 Following estimation of the price impacts of the RFS, we subsequently assessed the  
300 response of crop rotations to changes in price. We assumed an estimated 30% persistent  
301 increase in the price of corn and 20% increase in the prices of soybeans and wheat (see  
302 supplementary results) and followed the approach of Hendricks *et al.* (2014) to estimate how  
303 changes in prices affect the likelihood of continuous corn, continuous other crops, and corn-other  
304 crop rotations (5, 9).

### 305 *Crop rotation model input*

306 To estimate our model, we built a spatiotemporal database of U.S. cropland fields, crop  
307 types, soil properties, climate data, and observed crop futures and basis prices. To delineate  
308 individual fields, we used field boundary data from the publicly available 2008 USDA Common



309 Land Unit (CLU) produced by the Farm Service Agency (10, 11). If CLUs were not available for a  
 310 given area, then we used satellite-delineated field boundaries from Yan and Roy (12).  
 311 Information on annual crop types, soil properties, and climate data for each field were then drawn  
 312 from the Cropland Data Layer (13), the Soil Survey Geographic Database (SSURGO) (14), and  
 313 the PRISM climate group (15), respectively.

314 Crop futures and local cash prices used for the model were obtained from the Bloomberg  
 315 Terminal (16). In total, the dataset represents local prices from 1,367 corn markets, 1,252  
 316 soybean markets, 84 HRS wheat markets, 96 HRW wheat markets, and 123 SRW wheat markets  
 317 that were continuously observed from 2004-16. National prices for cotton and rice were also  
 318 included in areas where these crops are relevant alternatives to corn. While we do not observe  
 319 georeferenced prices of rice or cotton, the production of these commodities is far more localized.  
 320 The goal in collecting these prices was to construct estimates of the price that producers expect  
 321 to receive at harvest time while they are making their planting decisions. Since corn planting does  
 322 not take place before March, this expected price is constructed as the spread between the nearby  
 323 and harvest futures prices plus the local price, averaged over the months of January and  
 324 February. Depending on the commodity, this spread will be the difference between the price of a  
 325 November or December contract and the price of a March contract. The spread between the  
 326 nearby and harvest futures prices represents the market's expected cost of storing a single  
 327 bushel from planting time to harvest time. Adding the local price to this spread completely  
 328 compensates a producer that would store a bushel to sell at harvest time relative to selling at  
 329 planting time.

### 330 *Crop rotation model estimation*

331 First, we estimated the impact of corn prices and other crop prices on the probability of  
 332 planting corn or another crop on a given field. Our regression models are the same as those  
 333 used in Pates and Hendricks (2021), which follow the frameworks of Hendricks *et al.* (2014) to  
 334 account for the common practice of rotating crops (e.g., alternating between corn and  
 335 soybeans)(5, 9, 17). The probability of planting corn if corn was previously planted on the field  
 336 was estimated as

$$337 \quad \text{Prob}(y_{it} = \text{corn} | y_{i,t-1} = \text{corn}) = \Lambda(\beta_{10} + \beta_1^C P_{it}^C + \beta_1^O P_{it}^O + \boldsymbol{\gamma}'_1 \mathbf{X}_{it}),$$

338 and the probability of planting corn given that a different crop was previously planted was  
 339 estimated as

$$340 \quad \text{Prob}(y_{it} = \text{corn} | y_{i,t-1} = \text{other}) = \Lambda(\beta_{20} + \beta_2^C P_{it}^C + \beta_2^O P_{it}^O + \boldsymbol{\gamma}'_2 \mathbf{X}_{it}).$$

341 The variable  $y_{it}$  is a binary indicator if the crop on field  $i$  in year  $t$  is corn or some other crop,  $P_{it}^C$  is  
 342 the price of corn,  $P_{it}^O$  is the price index of other crops, and  $\mathbf{X}_{it}$  is a vector of controls. To reflect  
 343 local basis patterns, we derived field-specific prices using an ordinary kriging of observed prices  
 344 from thousands of locations in the region. The controls in our model include the field's slope,  
 345 National Commodity Crop Productivity Index (NCCPI), irrigation status, and binary indicators for  
 346 extreme precipitation conditions during the planting season. We also include a linear time trend  
 347 to account for technology change. We estimated logistic models as denoted by the function  $\Lambda(\cdot)$ .  
 348 We estimated separate models in different Major Land Resource Areas (MLRAs) and soil texture  
 349 groups to account for the fact that corn area may be more responsive to price in some regions.

350 We estimated the models for all fields greater than 6 ha (15 acres) that were in regions where (i)  
 351 over 20% of the total area was cropland; (ii) more than 10% of cropland area was planted to corn;  
 352 and (iii) more than 50% of the cropland not planted to corn was planted to a crop for which prices  
 353 were available, specifically wheat, soybeans, rice, and cotton. This set of criteria ensured  
 354 adequate data were available to train the model. Our final sample included 3.6 million fields that  
 355 accounted for 91.6% of corn area between 2009-16, inclusive. A complete description of the  
 356 modeling and data sources can be found in Pates and Hendricks (2021).

357 Next, we used the estimated model to simulate the impact of a change in prices on the  
 358 probability of specific crop rotations. The probabilities of planting a corn-corn rotation  
 359 ( $Prob^{CC}{}_{ROT}$ ), an other-other rotation ( $Prob^{OO}{}_{ROT}$ ), and a corn-other rotation ( $Prob^{OC}{}_{ROT}$ ) were  
 360 calculated for a given price scenario as follows (Pates and Hendricks, 2021):

$$361 \quad Prob^{CC}{}_{ROT} = Prob^{corn} \times Prob(y_{it} = corn | y_{i,t-1} = corn),$$

$$362 \quad Prob^{OO}{}_{ROT} = (1 - Prob^{corn}) \times (1 - Prob(y_{it} = corn | y_{i,t-1} = other)),$$

$$363 \quad Prob^{OC}{}_{ROT} = \frac{1}{2} [Prob^{corn} \times (1 - Prob(y_{it} = corn | y_{i,t-1} = corn)) \\ 364 \quad + (1 - Prob^{corn}) \times Prob(y_{it} = corn | y_{i,t-1} = other)],$$

365 where  $Prob^{corn}$  is the long-run probability of planting corn calculated as

$$366 \quad Prob^{corn} = \frac{Prob(y_{it} = corn | y_{i,t-1} = other)}{1 - Prob(y_{it} = corn | y_{i,t-1} = corn) + Prob(y_{it} = corn | y_{i,t-1} = other)}.$$

367 We calculated the change in probability of each rotation due to the RFS for each of the 3.6 million  
 368 crop fields as the difference in the probability under the RFS scenario with observed prices and  
 369 the counterfactual BAU scenario based on our estimates of crop price impacts from our vector  
 370 autoregression model described in the previous section — 30% higher corn prices and 20%  
 371 higher soybean and wheat prices. To estimate the change in area of specific crop rotations, we  
 372 multiplied the change in rotational probability for each field by the corresponding field size. These  
 373 field-level changes were subsequently aggregated to the county and national level for  
 374 visualization and reporting, respectively.

### 375 Estimating effects on cropland area

376 We assessed the impact of the RFS on cropland area by estimating changes in the  
 377 probability of cropland expansion and abandonment. To do this, we estimated the probability of  
 378 transitions between cropland and both land in pasture or in the Conservation Reserve Program  
 379 (CRP). These transition probabilities were estimated as a function of cropland, pasture, and CRP  
 380 returns and trained using point-level data from the National Resources Inventory (NRI) from  
 381 2000-12. We then used the model to predict the change in transitions between 2008-16 based  
 382 on changes in prices associated with the RFS (18).

383 *Cropland transitions model input*

384 We developed our model of cropland area changes based on point-level land use  
385 transition data from the USDA National Resources Inventory (NRI) collected by the Natural  
386 Resources Conservation Service (NRCS) (18). The NRI provides annual land use data at a  
387 sampling of points across the United States from 2000-12. For our analysis, we focused on  
388 cropland (cultivated and noncultivated) transitions with either pasture or CRP land. We also used  
389 information in the NRI about the land capability classification of each point and its soil texture. If a  
390 point was enrolled in the CRP, the NRI indicates the year of the general signup number  
391 associated with its enrollment. Because the point-level data from the NRI indicate the county in  
392 which a point is located — but not its GIS location — variables constructed from other data  
393 sources were then merged into the NRI by county.

394 We constructed cropland returns as a 10-year discounted stream of expected returns  
395 averaged across the relevant crops of the county, assuming a discount rate of 5%. Crops in the  
396 calculations include corn, soybeans, winter wheat, spring wheat, rice, cotton, and sorghum.  
397 Projected prices for the next 10 years were obtained from the Agricultural Baseline Database  
398 from the Economic Research Service (19). These prices are created as part of the USDA's  
399 longterm projections report. For expected crop yields, we estimated county-specific trend yields.  
400 Costs of production were from Economic Research Service Commodity Costs and Returns (20)  
401 and utilized at the Farm Resource Region level or groups of states — ERS has changed its  
402 reporting regions over time. We included costs for seed, fertilizer, pesticides, and custom  
403 operations, which represent the primary cost differences across commodities. Other cost  
404 categories available in the data were excluded because of their minor role and because their  
405 definitions have changed over time, which could have improperly distorted the model. For all  
406 categories, we assumed costs remain constant over the 10-year projection period for the stream  
407 of expected returns. Returns were then averaged across crops for each county, where the weight  
408 given to each crop was the five-year moving average of area planted to that crop. Pasture  
409 returns were calculated as an estimate of pasture rental rates, which were derived from  
410 information about animal stocking densities and the price of hay (21). Pasture stocking densities  
411 (measured in animal-unit months) at the county level were obtained from Atwood *et al.* (2005)  
412 who extracted the values from the STATSGO soils data and cleaned the data (22). Hay prices  
413 were a five-year moving average of prices from NASS (23). Translating animal-unit months into  
414 rental rates requires several other parameter assumptions that can vary across states. Instead of  
415 making such assumptions about these parameters, we calibrated our rent estimates by state so  
416 that our rent estimates were similar in magnitude to 2009-16 pasture rental rates reported by  
417 NASS.

418 Several important variables for the CRP were obtained at the county level through a  
419 Freedom of Information Act request. The return from enrollment in the CRP is the rental rate of  
420 newly enrolled contracts. While the CRP rental rate data available online report the average rent  
421 for all enrolled land, we used only the rental rate of newly enrolled contracts, which better  
422 represents the decision variable for farmers. We also utilized data on (i) the average  
423 Environmental Benefits Index of land offered — both accepted and rejected — for CRP  
424 enrollment; (ii) the area of land with expiring contracts in each year based on the original contract;  
425 and (iii) the area of land eligible for early contract release in 2015 (see (24)).

426 We used climate data at the county level (25), and assumed that farmers make land use  
427 decisions based on expected climate conditions and that these climate conditions are

428 approximated by a 30-year average of weather variables. Weather variables included were the  
 429 water deficit, water surplus, growing degree days between 10°C and 30°C, and extreme degree  
 430 days (days above 30°C). Water deficit and surplus were calculated from a daily water balance  
 431 model. Water deficit represents the amount of reference evapotranspiration demand that cannot  
 432 be met by available water. Water surplus represents precipitation in excess of evapotranspiration  
 433 demand. See (25) for details.

434 In order to allow for geographic variation in the extensive margin response of land use to  
 435 crop prices, we trained independent models for each of seven Land Resource Regions (LRR) that  
 436 correspond to aggregated Major Land Resource Areas (MLRAs) from the Natural Resources  
 437 Conservation Service. For our sample of NRI points to estimate the models, we selected Major  
 438 Land Resource Regions (MLRAs) where (i) over 20% of total land area is crop production; (ii)  
 439 over 10% of cropland is planted to corn, soybeans, or wheat; and (iii) more than 50% of total crop  
 440 area was planted to crops included in our estimate of cropland returns. Fig. S11 shows the  
 441 regions that met these criteria and were included in our analysis. The region label indicates the  
 442 letter of the Land Resource Region (LRR). Multiple letters indicate that LRRs were combined.  
 443 LRR  $M$  had many more NRI points than other LRRs and included some areas that were very  
 444 densely cropped while other areas had a substantial portion of grassland. Therefore, we divided  
 445 this LRR based on whether the Major Land Resource Region (subregions within the LRR) had  
 446 grassland area less than or greater than 15% of the area of cropland.

#### 447 *Cropland transitions model development*

448 We utilized the NRI data to estimate how changes in land use returns over time affect the  
 449 probability of transitions between cropland and pasture and between cropland and the CRP (26–  
 450 30). We estimated only these two transition types because there are very few transitions  
 451 between cropland and other types of land use in our study region. Notably, between 2000-12 in  
 452 our region, only 0.01% of cropland became rangeland, 0.02% was changed to forestland, 0.01%  
 453 of rangeland transitioned to cropland, and 0.01% of forestland became cropland. These represent  
 454 too small a sample of NRI data to estimate how returns impacted the likelihood of a transition.

455 The probability of expansion of cropland from pasture was estimated as

$$456 \quad \text{Prob}(lu_{nt} = \text{crop} | lu_{n,t-1} = \text{pas})$$

$$457 \quad = \Phi(\theta_0^{\text{crop}} R_{mt}^{\text{crop}} + \theta_0^{\text{pas}} R_{mt}^{\text{pas}} + \varphi_0^{\text{crop}} \bar{R}_m^{\text{crop}} + \varphi_0^{\text{pas}} \bar{R}_m^{\text{pas}} + \delta'_0 X_n)$$

458 where  $\text{Prob}(lu_{nt} = \text{crop} | lu_{n,t-1} = \text{pas})$  denotes the probability that NRI point  $n$  has a land use of  
 459 cropland in year  $t$  and pasture in year  $t - 1$  and this probability is a function of the returns to  
 460 cropland ( $R_{mt}^{\text{crop}}$ ) in county  $m$ , returns to pasture ( $R_{mt}^{\text{pas}}$ ), and a vector of other characteristics of the  
 461 NRI point ( $X_n$ ). The notation  $\Phi(\cdot)$  denotes the cumulative normal distribution to indicate that the  
 462 probability is estimated with a probit model. The probability of abandonment of cropland to  
 463 pasture was estimated similarly as

$$464 \quad \text{Prob}(lu_{nt} = \text{pas} | lu_{n,t-1} = \text{crop})$$

$$465 \quad = \Phi(\theta_1^{\text{crop}} R_{mt}^{\text{crop}} + \theta_1^{\text{pas}} R_{mt}^{\text{pas}} + \varphi_1^{\text{crop}} \bar{R}_m^{\text{crop}} + \varphi_1^{\text{pas}} \bar{R}_m^{\text{pas}} + \delta'_1 X_n).$$

466 The controls included in the regression to account for soil productivity include a set of  
 467 binary variables to indicate if the land capability classification is 1 or 2 or whether the land  
 468 capability classification is 3 or 4, as well as indicators for five soil texture classifications. Controls  
 469 to account for the climate of each county included water deficit, water surplus, growing degree  
 470 days, and extreme degree days. The models were estimated separately for each region in Fig. S5  
 471 because we expected that crop returns have a different impact on transitions in different regions.

472 A key difference between our specification and previous literature is that we controlled for  
 473 average returns ( $\bar{R}_m^j = \frac{1}{T} \sum_t R_{mt}^j$ ) to account for unobservable variables that may be correlated  
 474 with returns. This specification is known as the correlated random effects probit model and  
 475 assumes that, conditional on average returns and observables  $X_n$ , any remaining unobserved  
 476 heterogeneity is uncorrelated with returns (31). Intuitively, adding  $\bar{R}_m^{crop}$  and  $\bar{R}_m^{pas}$  as controls  
 477 means that we are exploiting changes in returns over time rather than the pure cross-sectional  
 478 variation in returns. The terms  $\varphi^{crop}$  and  $\varphi^{pas}$  are nuisance parameters to account for  
 479 unobserved heterogeneity and should not be interpreted as causal parameters. The cross-  
 480 sectional variation in returns is subject to concerns about omitted variable bias because the NRI  
 481 points in counties with higher returns may be more likely to convert to cropland but for reasons  
 482 not fully accounted for in our controls  $X_n$ . The correlated random effects specification exploits  
 483 changes in crop returns over time that occurred due to changes in the demand for crops. The  
 484 correlated random effects model is similar to a fixed effects model but is free from bias from the  
 485 incidental parameters problem (31). While the correlated random effects model substantially  
 486 reduces endogeneity concerns, there could still be some remaining endogeneity. One potential  
 487 source of endogeneity is that additional cropland area could decrease crop prices. This remaining  
 488 endogeneity is expected to bias our estimates of cropland area response to price downward and  
 489 understate the environmental impacts of the RFS.

490 The probability of expansion of cropland from the CRP (i.e., exiting the CRP) was  
 491 estimated as

$$492 \text{Prob}(lu_{nt} = crop | lu_{n,t-1} = CRP \text{expiring})$$

$$493 = \Phi(\theta_0^{crop} R_{mt}^{crop} + \theta_0^{CRP} R_{mt}^{CRP} + \varphi_0^{crop} \bar{R}_m^{crop} + \varphi_0^{CRP} \bar{R}_m^{CRP} + \delta_0' X_n).$$

494 One important note about expansion of cropland from the CRP is that we estimated the  
 495 model only for NRI points that were enrolled in the CRP the previous year and for which the  
 496 contract may be expiring. Farmers enrolling in the CRP agree to a multiyear contract — typically  
 497 10 years. Therefore farmers make a decision about changing land use only when their CRP  
 498 contract is expiring. While we cannot know the exact date an individual point expires, we can  
 499 approximate this date because the NRI data indicate the CRP signup year for each NRI point.  
 500 Complicating determination of the exact expiration year, however, is that the USDA offered two-  
 501 to five-year contract extensions for contracts expiring between 2007-10 in order to stagger the  
 502 expiration of CRP contracts (24). Using this information and the NRI data, we tabulated how  
 503 often land exited the CRP for each signup year, determined the common exit years, and  
 504 estimated the model only for points in the respective years of potential exits.

505 The probability of abandonment of cropland to the CRP (i.e., enrollment into the CRP) is  
 506 estimated as

507 
$$Prob(lu_{nt} = CRP | lu_{n,t-1} = crop, t = \text{signup year})$$

508 
$$= \Phi(\theta_1^{crop} R_{mt}^{crop} + \theta_1^{CRP} R_{mt}^{CRP} + \varphi_1^{crop} \bar{R}_m^{crop} + \varphi_1^{CRP} \bar{R}_m^{CRP} + \delta_1' \mathbf{X}_n).$$

509 We estimated our model of CRP enrollment only in years where there was a signup for  
 510 general CRP. There were signups for the CRP in 2000, 2003, 2004, 2006, 2010, and 2011.  
 511 However, actual land use change usually occurs in the year after the signup, therefore we  
 512 estimated the model of CRP enrollment in years 2001, 2004-07, and 2011-12. We include 2006  
 513 because there were two signups in 2006 and one signup was in the spring, and we observed a  
 514 significant number of land use transitions to the CRP in 2006. Our models of CRP transitions are  
 515 unique compared to previous literature because we account for the effect of the CRP contract on  
 516 land use transitions.

517 The controls in the CRP transition equations were the same as for pasture, but they also  
 518 included the average Environmental Benefits Index (EBI) of land offered for the CRP in the  
 519 county. We did not use the EBI of the respective years due to endogeneity concerns — the EBI of  
 520 land offered for the CRP increases when crop prices are high because less land is offered for  
 521 enrollment. Instead, we used the average EBI of offered land over time as the control to account  
 522 for the fact that CRP enrollment is more likely in some counties because of a higher EBI.

523 *Cropland transitions model simulation.*

524 For the simulations, we estimated the area of land that transitioned to and from cropland  
 525 2009-16, inclusive, for each region due to the RFS. For transitions with pasture, we first predicted  
 526 the probability of transitions at each point with observed crop returns between 2009-12. The  
 527 probability of transitioning was multiplied by the area of land the point represented — this is  
 528 included in the NRI data — and aggregated to the region level. We then calculated new cropland  
 529 returns if the price of corn had not experienced a 30% increase and the price of soybeans and  
 530 wheat had not experienced a 20% increase, and we calculated the predicted area of transition to  
 531 represent the counterfactual BAU scenario without the RFS. The average annual change in area  
 532 of transition was then multiplied by eight to predict the total changes in transitions due to the RFS  
 533 over the course of 2009-16, inclusive.

534 The same basic simulation approach was used to estimate the change in transitions with  
 535 the CRP, except that we accounted for expiring CRP area and signups. To predict how much  
 536 land exited the CRP we calculated the change in the probability of exiting the CRP if the contract  
 537 was expiring and multiplied this by the total area expiring in a given year. For years 2013-16 that  
 538 are outside the NRI sample period, we scaled our estimate of CRP exiting by the relative change  
 539 in the number of CRP contracts with expiring area. The relative change in the number of expiring  
 540 contracts was calculated from county-level data from the Farm Service Agency. To simulate CRP  
 541 enrollment, we estimated how predicted enrollment changed in signup years between 2009-16.  
 542 The only general CRP signups in this period were in 2010, 2011, and 2013. We assume that all  
 543 points in cropland in 2012 were eligible for CRP enrollment in fiscal year 2013.

544 Estimating specific locations of change

545           After estimating the transition areas of cropland with pasture or CRP due to the RFS, we  
546 then used high resolution data on the likely locations of cropland transitions in order to spatially  
547 allocate and identify for further modeling the characteristics of converted land. To do this, we first  
548 mapped observed land use change at the field level during our study period, building upon the  
549 approach of Lark *et al.* (32) and using updated recommended practices (33) to extend the  
550 analysis up through the 2016 growing season (34). To enumerate environmental impacts, these  
551 data were then used to link the estimated extent of land use change associated with the RFS in  
552 each major LRR region to specific locations of observed conversion. Thus, while high-resolution  
553 data were used to identify the specific field-level parcels and characteristics of converted land, the  
554 data from the NRI were used to estimate the magnitude of this conversion that occurred within  
555 each region and how much could be attributed to the RFS. This hybrid approach thereby  
556 combined the NRI data's high certainty and long-term temporal coverage (prior to any RFS price  
557 signals — needed to estimate our probit model) with the field-level detail and specificity of the  
558 satellite-based land conversion observed during the study period (33).

### 559 Estimating water quality impacts

560           Determining the impacts of the RFS on water quality indicators due to changes in crop  
561 rotations and cropland transitions requires an assessment of the effects of various cropping  
562 systems and of recent cropland expansion and abandonment. To do this, we employed a  
563 process-based agroecosystem model — Agro-IBIS — to simulate fluxes of water, energy, carbon,  
564 nitrogen, and phosphorus across our study period for alternate cultivation scenarios based on the  
565 methods of Motew *et al.* (35) and Donner and Kucharik (36).

566           For both the crop rotation and cropland transition sets of scenarios, we simulated a  
567 common historical period, followed by unique simulations for each pathway. The common period  
568 was 1750 to 1960 when all state variables of the model (e.g., soil carbon and nitrogen) are “spun-  
569 up” to account for the legacy of historical land cover and agricultural practices. The datasets used  
570 to simulate this time period included historical land cover, nutrient applications, and irrigation  
571 extent. The second period was 1961 to 2016 and was simulated differently for the crop rotation  
572 and the cropland transitions impact pathways.

573           For crop rotations, we simulated five cropping systems uniformly across all agricultural  
574 land in the conterminous US (CONUS) under identical initial conditions: continuous corn (CC),  
575 continuous soy (SS), corn-soy rotation (CS), continuous wheat (WW), and corn-wheat rotation  
576 (CW). The spatial scale for the crop rotations modeling was 2.5 arc-minute grid cells and was  
577 performed for all land classified as cropland according to Lark *et al.* (37). To determine the  
578 impacts of the RFS, we multiplied the outputs for each cropping system by the change in its  
579 probability due to the RFS as determined via the econometric model described earlier. For all  
580 non-corn (i.e. “other”) crops, including those not modeled, we estimated the water quality impacts  
581 as a weighted average of soybeans and wheat based on the planted area ratio of each crop  
582 within each county or region.

583           For cropland transitions, we modeled two land cover scenarios — cropland and  
584 noncropland — for the areas determined by the specific cropland expansion and abandonment  
585 locations described above. For this set of scenarios, we estimated impacts for each distinct patch  
586 of converted land that was classified as expanded or abandoned in the land transition model. We  
587 then compared the median patch-level losses of nitrogen, phosphorus, and sediment for 2007-16  
588 between the cropland and non-cropland simulations to estimate the differential impact of cropland

589 area changes. These per-area differential impact values (or impact intensities) were then  
590 multiplied by the estimated areas of land use change due to the RFS within each major LRR  
591 region to estimate the total impact of the RFS due to increased cropland expansion and reduced  
592 abandonment.

593 Outputs from both pathway simulations included the median annual field-level losses of  
594 nitrogen (via potential nitrate leaching to groundwater or flux past a soil depth of 1.5 m) [kg of  
595 NO<sub>3</sub>-N/ha], phosphorus (via runoff) [kg/ha], and sediment (via runoff) [tons/km<sup>2</sup>] for the years  
596 2007-16, which provided a recent 10-year simulation period that overlapped fully with our period  
597 of study (2008-16) as well as two Censuses of Agriculture (2007 and 2012), thereby providing  
598 broader representation of data inputs and conditions across the period of interest.

599 Below, we describe the development of the model inputs and datasets, including those  
600 for soil and topography, historic land-use/land-cover (LULC), nutrient application rates, and the  
601 extent of irrigation. In general, all inputs were resampled to 2.5 arc-minute resolution for the crop  
602 rotation simulations or maintained in their native resolution to determine patch-level  
603 characteristics for the cropland transitions simulations.

#### 604 *Agroecosystem model input — Soil texture and topography*

605 We created maps of the major USDA soil texture classes based on the 30m resolution  
606 POLARIS dataset (38) which is a probabilistic remapping of the USDA Soil Survey Geographic  
607 database (SSURGO). We used values of percent sand, silt, and clay associated with the surface  
608 soil layer (0 to 5 cm depth) to predict the USDA textural class based on boundaries defined by the  
609 National Soil Survey Center (39).

610 We created maps of the following variables related to topography and that are needed as  
611 inputs to AgrolBIS: land surface elevation, slope, slope length and steepness factor (LS-factor),  
612 and slope length. All variables were derived from a 30m resolution, hydrologically conditioned  
613 land surface elevation dataset from the USGS Elevation Derivatives for National Applications  
614 (EDNA) project (40). We then calculated slope using the nine parameter, second order  
615 polynomial method from Zevenbergen and Thorne (41). Slope was then resampled at one arc-  
616 second using a simple nearest neighbor calculation.

617 The LS-factor used in the Modified Universal Soil Loss Equation (MUSLE), which is  
618 embedded in Agro-IBIS, was calculated following the method of Panagos *et al.* (42). First, we  
619 calculated flow accumulation and specific contributing area using the "Multiple Flow Direction"  
620 option in SAGA-GIS (43, 44). We then calculated the LS-factor within SAGA-GIS using the  
621 method from Desmet and Govers (45). Lastly, we resampled the LS-factor to one arc-second  
622 using a simple nearest neighbor calculation.

623 To calculate slope length, we first resampled land surface elevation to three arc-seconds  
624 using bilinear interpolation and then calculated slope length within SAGA-GIS using the method  
625 from Olaya (46). We then developed a method to modify the slope length based on the location of  
626 channels as defined by the USGS National Hydrography Dataset Plus (NHDPlus V21) (47). The  
627 original intention of the slope length term used in MUSLE (48) was to represent the length of  
628 slope before overland flow reaches a channel or some area with substantial deposition.  
629 Therefore, we set the value of slope length for grid cells that contain a defined channel to half of  
630 the cell-width. To implement this method, we converted the national seamless network flowline  
631 from NHDPlus V21 to a three arc-second raster with a value of 45 meters using ArcGIS. We then  
632 mosaicked this new raster dataset with the original slope length raster.



633 *Agroecosystem model input — Historical land-use/land-cover*

634 Land cover categories for the agroecosystem modeling were determined based on the  
635 vegetation types simulated in Agro-IBIS (Table S5). We used several gridded land cover datasets  
636 (Table S6) as well as historical county-level USDA Census of Agriculture data (49) to span this  
637 entire time period. Note that for post-1900 land cover and nutrient application rate map creation,  
638 we accounted for changing county boundaries over time by using county boundary shapefiles  
639 from the National Historical Geographic Information System (50).

640 We extracted data from each available year and each county of the USDA Census of  
641 Agriculture (hereafter referred to as the Ag Census) (49) over the period 1939-2012 including  
642 area associated with harvested cropland for each distinct crop type, pasture, irrigated cropland,  
643 and irrigated pasture. We then removed outliers and interpolated missing values from each  
644 county's time-series for each variable. Next, we grouped variables to create statistics relevant for  
645 the land cover map creation (Table S7). Note that the "wheat" category is comprised of wheat,  
646 oats, barley, buckwheat, emmer and spelt, rye, and triticale (all members of the Pooideae  
647 subfamily).

648 We used all input datasets from Table S6 to define open water grid cells based on  
649 whether they were ever classified as open water regardless of the year or dataset. We did this to  
650 avoid the case where open water cells (not simulated by Agro-IBIS) convert from or to land cells.  
651 We used a global dataset representing potential natural vegetation created by Ramankutty and  
652 Foley (51) to associate with years 1750-1900. This 151-year period with constant vegetation  
653 cover was used during part of the biogeochemical spin-up period of the model where rates are  
654 artificially accelerated so that a quasi-equilibrium is reached in a more rapid and computationally  
655 efficient manner similar to Motew *et al.* (35).

656 For the period 1901 to 2007, we used a combination of datasets (52–56) that specify land  
657 cover types that are natural (e.g., forest, grassland) or broad agricultural (e.g., cropland,  
658 hay/pasture), as well as historical county level Ag Census data (49) to allocate crop types and  
659 pasture within the broader agricultural land covers. We used a semirandom algorithm that  
660 accounts for the relative areas of cropland and crop type within a given county, similar to Hamlin  
661 *et al.* (57). Due to the county-level nature of the USDA Census of Agriculture data, we used  
662 historical county boundaries available from the National Historical Geographic Information  
663 System (50).

664 For the period 1901-98, we used data from the FORE-SCE model (55, 56) for the years  
665 1938-98 combined with Ag Census data for the years 1939, 1944, 1949, 1954, 1959, 1964, 1969,  
666 1974, 1978, 1982, 1987, 1992, and 1997. First, non-agricultural grid cells were determined based  
667 on the FORE-SCE model output and a look-up table. Additional modifications were needed for  
668 the "developed" and "mechanically disturbed forests" classes. If a cell was categorized as  
669 "developed," we used the developed subclass (high, medium, low intensity, open) from the 2011  
670 USGS National Land Cover Dataset (NLCD) for that cell. Therefore, once a cell was "developed",  
671 its subclass did not change over the simulation. For the FORE-SCE model output in the  
672 "historical" (56) time period (1993-98), we converted the "mechanically disturbed forest" (i.e.,  
673 clearcut) classes to the nearest forest subclass from the 2006 USGS NLCD.

674 Next, we developed a method to estimate agricultural land cover that included major crop  
675 types (corn, soy, wheat, alfalfa) at the subcounty scale. Broadly, this method uses the FORE-  
676 SCE model output to determine where within a county certain cover types should be located,  
677 combined with the Ag Census data to determine the relative proportions of each cover type within  
678 a county. In addition, this method addressed the challenge of mapping pasture area within the

679 FORE-SCE model and modified the dataset so that it was consistent with the pasture areas  
 680 reported in the Ag Census. To do this, we isolated the grid cells categorized as "cropland" by the  
 681 FORE-SCE model for each county. We then used the processed Ag Census dataset (see  
 682 discussion above) to semi-randomly assign corn, soy, and wheat to grid cells based on each  
 683 crop's area relative to the total cropland area as reported in the Ag Census. If no cropland area  
 684 was reported in the census data but FORE-SCE simulated cropland for a given cell, then the  
 685 "hay" class was assigned. Next, we isolated the grid cells categorized as 'hay/pasture land' by  
 686 FORE-SCE for each county and used the Ag Census data to semi-randomly assign alfalfa,  
 687 nonalfalfa hay, and pasture, based on each cover type's area relative to the total area of all three  
 688 cover types as reported in the Ag Census. Following these land cover assignments, we  
 689 calculated the total pasture area that had been assigned and compared it to the pasture area  
 690 reported in the Ag Census. If the Ag Census pasture area value was greater than that which was  
 691 currently assigned, then we randomly assigned a portion of grassland and shrubland within the  
 692 county to pasture so that the areas matched. For our modeling purposes, we used the 1938 land  
 693 cover for the years 1901-37.

694 Lastly, we used a nearly identical method for the period 1999-2007 using NLCD land  
 695 cover data (52, 53) instead of the FORE-SCE model output. We used NLCD 2001 for years 1999-  
 696 2003 and NLCD 2006 for years 2004-07. For the period 2008-17, we used the USDA-NASS  
 697 Cropland Data Layer (CDL) and a look-up table to convert CDL land cover classes to vegetation  
 698 types simulated by AgrolBIS. Look-up table values for crops not simulated by AgrolBIS were  
 699 made based on the closest plant functional type with corn as the default in ambiguous cases.

#### 700 *Agroecosystem model input — Fertilizer and manure N and P application rates*

701 Following completion of the land cover dataset, we used county-level estimates of  
 702 nitrogen (N) and phosphorus (P) inputs to the land surface developed by the U.S. Geological  
 703 Survey (58–63) for the period 1945-2012 for fertilizer and 1982-2012 for manure (Table S8). We  
 704 determined crop-specific rates of fertilizer N and P application based on the total mass of fertilizer  
 705 N and P applied at the county-scale and an assumption of constant ratios between fertilizer rates  
 706 for corn and those for the other agricultural land covers (soy, wheat, alfalfa, nonalfalfa hay, and  
 707 pasture). We assumed that total fertilizer mass for a given county ( $m_{fert}$ ) could be calculated using  
 708 the following equation:

$$709 \quad (1) \quad m_{fert} = F_{corn} \times A_{corn} + F_{soy} \times A_{soy} + F_{wheat} \times A_{wheat} + F_{alfalfa} \times A_{alfalfa} + F_{hay} \times A_{hay} \\ 710 \quad \quad \quad + F_{pasture} \times A_{pasture}$$

711 where  $F_x$  is the county-average fertilizer application rate for a given crop  $x$  and  $A_x$  is the area  
 712 devoted to crop  $x$  within that county. The constant ratios (Table S9) were determined based on  
 713 current recommendations from several university extension publications (64, 65).

714 We used estimates of county-level fertilizer N and P mass from Alexander and Smith (58)  
 715 for years 1938-85 (using 1945 values for the missing years of 1938-44), Gronberg and Spahr (60)  
 716 for years 1986-2006 (using 1987 values for the missing year of 1986), and Brakebill and  
 717 Gronberg (59) for years 2007-17 (using 2012 values for the missing years of 2013-17).

718 For manure N and P application rates, we used county-level estimates from Ruddy *et al.*  
 719 (63) based on several Ag Census years (1982, 1987, 1992, and 1997) and applied them to the  
 720 nearest year for the time period 1980-99. Similarly, we used manure data from Mueller and  
 721 Gronberg (62) based on the 2002 Ag Census and applied it to the years 2000-04; and manure

722 data from Gronberg and Arnold (61) based on 2007 and 2012 Ag Census data applied to the  
723 years 2005-17.

724 For each year and county, the manure N and P application rates were determined by  
725 dividing the total manure mass by the total area devoted to cropland, hay, and pasture (as  
726 specified by the land cover data). Thus, manure application is assumed to be uniform across all  
727 cover types that could potentially receive manure in each county.

#### 728 *Agroecosystem model input — Irrigated extent*

729 Maps of irrigated agriculture (cropland and pasture) for 1938-2017 were created based  
730 on the Moderate Resolution Imaging Spectroradiometer (MODIS) Irrigated Agriculture Dataset for  
731 the United States (MlrAD-US) (66) for the years 2002, 2007, and 2012, and processed historical  
732 data from the Ag Census (see above). First, we created a maximum irrigation extent map that  
733 included all grid cells that were identified as irrigated in 2002, 2007, or 2012. Next, for each  
734 county and year in the period 1938-99 we extracted processed Ag Census data from the nearest  
735 census year on the fraction of cropland and fraction of pasture that were irrigated. Using the  
736 fraction of cropland that was irrigated, we calculated the number of grid cells that would need to  
737 be classified as irrigated cropland based on the total cropland area from the land cover map for  
738 the current year and county. We then determined which grid cells were both within the maximum  
739 irrigation extent for a given county and classified as cropland for the current year. If the number of  
740 grid cells needing to be classified as irrigated cropland was greater than or equal to the number of  
741 overlapping cells (irrigation extent and those classified as cropland), then all overlapping cells  
742 were classified as irrigated. If the number was less than the number of overlapping cells, then  
743 cells were randomly drawn from the pool of overlapping cells so that the total area of irrigated  
744 cropland was satisfied. An identical method was then implemented for irrigated pasture. For the  
745 period 2000-17, we used the closest MlrAD-US dataset (e.g., the 2002 dataset for years 2000-04)  
746 to classify cells as irrigated if they were also classified as cropland or pasture.

#### 747 Estimating greenhouse gas (GHG) emissions from land use change (LUC)

748 We used the nonlinear nitrogen effect model (NL-N-RR) of Gerber *et al.* (67) to estimate  
749 nitrous oxide (N<sub>2</sub>O) emissions. For each change in crop rotation or cropland area due to the  
750 RFS, we used the associated change in N application data based on the agroecosystem model  
751 above and estimated the corresponding change in N<sub>2</sub>O emissions. We converted our N<sub>2</sub>O  
752 estimates to CO<sub>2</sub>e by assuming a 100-year global warming potential of 265 (68).

753 We used the methods of Spawn *et al.* (2019) to estimate the ecosystem carbon  
754 emissions from RFS-related land conversion (69). Carbon emissions from soil and biomass  
755 degradation associated with land conversion were modeled for all observed cropland expansion,  
756 including methane (CH<sub>4</sub>) emissions from conversion of organic wetlands. The model has been  
757 validated against field observations of post-conversion SOC change from Sanderman (70) and  
758 accurately predicts SOC emissions throughout the US for conversion subsequently managed with  
759 conventional tillage. Model predictions are also similar to those observed after conversion of CRP  
760 land when managed with conventional tillage (71).

761 In addition, a variant of the Spawn *et al.* model was created to assess forgone  
762 sequestration associated with reduced rates of cropland abandonment. This model was  
763 structurally the same as that used for conversion to cropland but used a carbon response function  
764 (72) for conversion of cropland to grassland to estimate expected soil organic carbon

765 accumulation over a 15 year period — the average length of a CRP contract. We thus assumed  
766 that any abandoned land would have been retired to the CRP and sequestered carbon for the  
767 duration of its contract. To attribute emissions to the RFS, we multiplied total emissions from all  
768 observed land conversion within a given LRR by the percentage of that region's observed  
769 conversion that could be attributed to the RFS, as estimated by the econometric model above.

770 Using the estimate of total cumulative emissions due to the RFS, we then calculated  
771 emissions per liter of increased annual ethanol demand. To do so, we first allocated total  
772 ecosystem carbon emissions over a 30-year period following the approach of the U.S.  
773 Environmental Protection Agency (EPA) (73). While most of the emissions associated with  
774 conversion to cropland are likely to be emitted near the start of the time period, this approach  
775 accounts for the uncertain timing and permanence of those emissions. As noted by (73), utilizing  
776 a longer annualization period would decrease the apparent emissions from the RFS, while a  
777 shorter period would increase apparent emissions. To this annualized value of ecosystem carbon  
778 emissions, we added the annual nitrous oxide emissions from crop rotation and cropland area  
779 changes. We then divided these combined annual emissions associated with the RFS by the  
780 increased annual demand in ethanol estimated from our price impacts model, and subsequently  
781 converted to emissions per unit of energy equivalent using a heating value of 21.46 MJ/L (73).

## 782 Integrating models

783 We estimated the overall effects of the RFS on environmental outcomes by summing the  
784 results of two independent pathways of influence—intensification and extensification—that  
785 integrated results from the price, land use, and biophysical models. The intensification pathway  
786 captured the impacts of the RFS as manifested through changes in crop rotations, whereas the  
787 extensification pathway captured those due to cropland area changes. A summary of model  
788 integration for each pathway is provided below, with details for each step and component  
789 available in the corresponding sections presented above.

### 790 *Intensification – environmental effects of crop rotation changes*

791 We estimated the RFS-induced effects of crop rotation changes on environmental  
792 outcomes by integrating outputs from the crop price, crop rotation, water quality, and nitrous  
793 oxide emissions models. For each individual crop field mapped and modeled in our study, we  
794 multiplied the probability of each rotation under the RFS and BAU scenarios by the area of the  
795 field and the per-area environmental impact. Total losses from nitrate leaching, soil erosion,  
796 phosphorus runoff, and nitrous oxide emissions on existing cropland for both the RFS and BAU  
797 scenarios were thus estimated as

$$798 \quad L = \sum_i a_i \sum_m L_{m,i} \Pi_{m,i}$$

799 where  $a_i$  is the area of field  $i$  in hectares,  $L_{m,i}$  denotes the 10-year median (2007-16) loss of  
800 nitrate, soil, phosphorus, or nitrous oxide per year for crop rotation  $m$  on field  $i$ , and  $\Pi_{m,i}$  denotes  
801 the probability of planting a given crop rotation  $m$  on field  $i$ . The change in losses due specifically  
802 to the RFS was subsequently calculated as  
803  
804

805

$$\frac{\partial L}{\partial RFS} = \sum_i a_i \sum_m L_{m,i} \sum_j \frac{\partial \Pi_{m,i}}{\partial p^j} \frac{\partial p^j}{\partial RFS}$$

806

807 where  $p^j$  denotes the price of crop  $j$  and  $\frac{\partial p^j}{\partial RFS}$  represents the change in crop price due to the RFS  
808 as estimated by our price impact model.

809

#### *Extensification – environmental effects of cropland area changes*

810

811 We estimated the RFS-induced effects of cropland area changes on environmental  
812 outcomes by integrating outputs from the crop price, cropland transitions, water quality, nitrous  
813 oxide emissions, and ecosystem carbon emissions models. We used the estimated change in  
814 crop prices due to the RFS and the marginal probabilities of transitioning between noncropland  
815 and cropland due the changes in crop prices to estimate the total area of transitions within each  
816 LRR. The area of transition within each LRR was subsequently allocated equally across all  
817 specific locations of observed land use change within each LRR, such that each field-level parcel  
818 of cropland expansion or abandonment was assigned a proportion of change that was due  
819 specifically to the RFS. This data fusion approach allowed us to utilize the long time period of the  
820 NRI data to estimate the response of land use to price while employing the high-resolution remote  
821 sensing data to determine the likely locations of these transitions that are important for  
understanding the environmental impacts.

822

823 To assess environmental impacts, we multiplied the proportion of change due to the RFS  
824 for each parcel by the parcel's area and its location-specific environmental effects. For the water  
825 quality indicators, we multiplied the RFS-attributed change by the per-area differential impact  
826 values (or impact intensities) for nitrate leaching, soil erosion, and phosphorus runoff. For GHG  
827 emissions, we multiplied the RFS-attributed change by the estimated nitrous oxide or ecosystem  
carbon emissions (mass per hectare) associated with each specific parcel of land.

828

#### Estimating uncertainty

829

830 We estimated uncertainty at multiple points of our causal analysis framework. Except for  
831 the price impacts, we propagated the uncertainty results throughout the connected components—  
832 from the land use models through to all subsequent environmental impacts. The methods for  
833 deriving each component of uncertainty are described below, with all results presented in the  
834 main text as 95% confidence intervals, reported as [lower limit (0.025 quantile), upper limit (0.975  
quantile)].

835

836 First, to understand the range of plausible price responses to the RFS, we used the  
837 approach of Carter *et al.* (1) to independently estimate 95% confidence intervals for the changes  
838 in price from BAU for corn, soybeans, and wheat. In order to constrain the subsequent estimates  
839 and preserve computational tractability, we then specified the price impacts of the RFS to be  
840 equal to the median percent increase in corn, soybean, and wheat prices and used these results  
841 for simulation of the remaining models. Thus, while we estimate a range of plausible price  
842 impacts of the RFS, our environmental outcomes reflect only those due to the median estimated  
price effects.

843

844 Next, we estimated uncertainty in our crop rotation model using a clustered wild score  
845 bootstrap. This bootstrap works by multiplying the score function by a random variable, called a  
perturbation, with a zero mean and unit variance. Our econometric model is comprised of a set of

846 logit regressions, estimated via maximum likelihood. The expected value of the score function is  
847 zero at the solution to the maximum likelihood estimation procedure. This means that the product  
848 of the score function value and a mean-zero unit-variance perturbation has the same mean and  
849 variance as the score function itself. This allowed us to simulate random draws for our model  
850 parameters by drawing pseudo-score values. Because most of the variation in crop prices is  
851 temporal, we clustered our bootstrap by year to avoid underestimating the amount of uncertainty.  
852 In practice, we do this by drawing a random perturbation term for each year and applying it to  
853 every observation within the respective year and re-estimate our model parameters. We repeated  
854 this process 1000 times to produce our parameter distributions that are used to calculate 1000  
855 different sets of crop rotation probabilities in the BAU and RFS scenarios. To ensure we have  
856 enough possible distinct sets of random draws, we used the perturbation distribution developed  
857 by Webb (74) which allows for six distinct perturbation values.

858 For our cropland transition model, uncertainty in the magnitude of cropland area change  
859 was estimated via a clustered bootstrap routine with 1000 replications. For each region of the  
860 model, the NRI points were resampled with replacement and the predicted change in cropland  
861 area due to the RFS was estimated for each replication. The standard error of the change in  
862 cropland area was estimated as the standard deviation across the bootstrap replications. Our  
863 estimate of uncertainty was robust to heteroskedasticity between points and autocorrelation for a  
864 given point since we clustered the bootstrap by NRI point. Previous analysis indicates minimal  
865 bias to the standard errors through spatial correlation because the NRI points are sufficiently  
866 sparse (26).

867 We then combined the bootstrapped replicate estimates from both the crop rotation  
868 exercise and that for cropland area with the biophysical model outputs to quantify uncertainty in  
869 terms of environmental indicators. For the crop rotation-based (i.e. intensification) estimates, we  
870 multiplied each of the replicate probability bootstraps for a given field by the area of that field and  
871 the impact intensity of each environmental variable. For each bootstrap, we summed the effects  
872 across all CONUS fields to generate a distribution ( $n = 1000$ ) of total nationwide impact estimates  
873 for each environmental indicator from which we summarized the mean and 95% confidence  
874 intervals.

875 For cropland transition estimates (i.e. extensification), since bootstrapped estimates  
876 represented the RFS-induced change in cropland area within larger LRR regions, we used a  
877 variant of the crop rotation procedure that utilized observed patterns of land use change (37) to  
878 further account for the more nuanced geographies of change that underly these aggregated  
879 estimates. Because each bootstrap represented an estimated area of change within each LRR  
880 region, for each estimate we then randomly selected patches of observed land use change from  
881 Lark *et al.* (37) within the corresponding region until the sum of selected patch area was equal to  
882 that of the bootstrap's value. We then also summed the modeled environmental impacts  
883 associated with each of the selected patches. Repeating this procedure for each of the 1000  
884 bootstraps of each LRR region provided a distribution of the estimated total environmental  
885 impacts within each LRR region and, when summed across regions, the nation.

886 Our approach did not capture uncertainty stemming directly from the biophysical and  
887 emissions models nor their inputs, as neither group of models natively quantify this uncertainty.  
888 To help address this limitation, however, we estimate the range of environmental outcomes due  
889 to uncertainty in both the magnitude and location of the underlying land use changes—thereby  
890 providing an indication of the corresponding variability in environmental outcomes. Nevertheless,  
891 the uncertainty ranges we report for emissions and other biophysical outcomes are likely still  
892 conservative estimates of total system uncertainty. In summary, across the study, we quantify

893 uncertainty associated with the price impacts of the RFS, as well as that arising from the  
894 magnitude of crop rotation and cropland area changes, their spatial locations, and the associated  
895 variations in environmental impacts.  
896

897 **Supplementary Text (SI Results and Discussion)**

898 Supplementary results for price impacts

899 We estimated the effects of the RFS on corn, soybean, and wheat prices by comparing  
900 observed prices in the 2006-10 crop years to the BAU projections for those years. Table S1  
901 shows that corn prices exceeded the BAU by 31%, soybean prices by 19%, and wheat prices by  
902 20% in 2006-10. These estimates include 95% confidence intervals of [5%, 70%] for corn, [-8%,  
903 72%] for soybeans, and [2%, 60%] for wheat. Thus, there is a wide range of plausible price  
904 effects in the model, but the point estimates round to 30% for corn and 20% for soybeans and  
905 wheat.

906 The observed and BAU prices for all 2006-16 crop years are presented in Fig. 1 of the  
907 main text, with the detailed outputs for our soybean and wheat models included in Tables S10-  
908 S13 and Figs. S12-S17. For the corresponding output for the corn model, see Tables 2-3 and  
909 Figures 5-7 of Carter *et al.* (1). As the criteria do for the corn model, the AIC<sub>c</sub> and BIC indicate  
910 that the soybean and wheat models fit best when using a single lag, and the impulse response  
911 functions conform to predictions of economic theory.

912 The models contain two distinct identifying assumptions: one provides point identification  
913 while the other provides set (partial) identification. Because the assumptions differ, there is no  
914 reason that the point identified parameter should lie within the identified set. In all cases, the  
915 estimated price effects are very similar whether we use the point estimate or the identified set.  
916 The vertical bars of Fig. 1 are 95% confidence intervals that capture uncertainty in the identified  
917 set for the model parameters. The parameters are estimated using data from the 1961-2005 crop  
918 years and so are subject to sampling error.

919 As additional validation, we compared the detrended prices of corn, soybeans, and wheat  
920 that we use in our analysis with the predicted prices from the VAR model as written in equation  
921 (23) of Carter *et al.* (2017)(Fig. S18). These are predictions of the current-year price given  
922 current-year values of the other variables and prior-year values of all the variables. The R<sup>2</sup>  
923 values for log future prices in the price models depicted in Fig. S18 are 0.81, 0.81, and 0.57 for  
924 corn, soybeans, and wheat, respectively, for the period of 1962-2005 and 0.89, 0.86, and 0.89 for  
925 the period of 2006-2016. Thus, the model fits are somewhat higher in the post-RFS period than  
926 before. These predictions show how well our model estimates prices overall, and we believe that  
927 their congruence with observed prices helps demonstrate the validity of the model across time  
928 and crops.

929 Our main results show that corn prices jumped in 2006 and increased even more the next  
930 year as traders stored additional corn in preparation for the impending ethanol boom (Fig. 1).  
931 Note that in the figure and text, years refer to crop years, and thus a price jump in 2006 refers to  
932 the 2006-07 crop year and therefore to a price for the crop harvested in fall 2006, which we  
933 measure in March 2007. BAU prices also increased during this initial period due to strong global  
934 commodity demand. The relative effect of the RFS was lower than average in the 2008-09 crop  
935 years as the financial crisis and the corresponding crash in oil prices and gasoline demand  
936 caused a drop in demand for corn from ethanol producers. Then in 2010-11, along with worse-  
937 than-expected crop yields, increasing ethanol demand caused corn prices to rise again  
938 significantly above the BAU values. In these two years, we estimate that corn prices were more  
939 than 50% higher than they would have been without the RFS-induced shocks.



940 In the BAU scenario, the market would have reduced corn inventory in 2010-11, making  
941 the market more vulnerable to the 2012 drought than occurred in actuality. In the real world, the  
942 presence of persistent high ethanol demand prevented inventories from being depleted too much  
943 and thus made the market more resilient entering the 2012 crop year. As a result, the drought hit  
944 BAU corn prices harder than observed prices, and the observed 2012 spot price was 30% above  
945 the BAU price. Good weather through the remainder of our study period produced large crops, so  
946 corn prices have declined from their peak values, but these declines also occur in the BAU  
947 scenario.

948 The patterns for corn are mirrored in soybeans and wheat, especially in the 2006-10  
949 period. The 2012 drought had much smaller effects on these commodities than on corn. There  
950 was a relatively small yield decline for soybeans and a yield increase for wheat in that year, so  
951 the BAU price does not spike for them as it does for corn. In the last few years, both the observed  
952 and BAU prices declined.

953 Our BAU projections become less credible as time passes. These projections assume  
954 only four sources of price shocks, and other potential sources of shocks became apparent after  
955 2010. In particular, a severe drought in South America reduced soybean production from  
956 Argentina and Brazil in the 2011 crop year (i.e., the harvest that occurred in the early part of  
957 calendar year 2012). These two countries produce half of the world's soybeans. This event  
958 pushed soybean prices up significantly, but it is not accounted for in the BAU projections. As a  
959 result, the BAU soybean prices after 2011 may be too low.

960 Similarly, for wheat, the 2012 drought caused an increase in the demand for animal feed  
961 due to the reduction in available corn. As a result, wheat prices rose. This shock is not included in  
962 the BAU projection, so the BAU wheat prices after 2011 may be too low. Thus, if we were to  
963 estimate the effect of the RFS by averaging all years from 2006-16, we would obtain estimates for  
964 soybeans and wheat that are larger than 20% but that are likely biased upwards. Therefore we  
965 conservatively used the average for 2006-10, which best captures the effects of the RFS while  
966 reducing interference and uncertainty from events that occur much later.

967 For comparison, Carter, Rausser, and Smith (1) report an alternative estimate of the  
968 effect of the RFS on corn prices. They impose a permanent demand shift of 1.3 billion bushels on  
969 the model and find a new equilibrium with 31% higher prices (90% CI: 0.05, 0.95). Their 1.3 billion  
970 bushel corn demand increase is equivalent to 20.8 billion additional liters of ethanol, which  
971 matches our posited incremental effect of the RFS. Thus, the similarity of the estimate from (1) to  
972 ours in Table S1 further supports our BAU approach.

### 973 Supplementary results for crop rotations

974 The validity of the crop rotation model is assessed by comparing predicted values to  
975 observed values. We find the model predicts well. Figure S19 shows the predicted corn area  
976 compared to the observed corn area over time while figure S20 shows the same for each crop  
977 rotation. The predicted area of corn and each crop rotation changes similarly with the observed  
978 areas over time. On average, our prediction is within 1.8% of the observed area for corn. Figure  
979 S21 shows the performance of the model at predicting differences in the area of each crop

980 rotation across space. The model does a good job of predicting more area of a corn-corn rotation  
981 in regions with a larger observed corn-corn rotation area, and similarly for other crop rotations.

982 Table S14 reports crop rotation elasticities with respect to prices. Elasticities indicate the  
983 percent change in area for each rotation with respect to a 1 percent increase in price, holding all  
984 else constant. As expected, the model indicates that an increase in the price of corn increases  
985 the area of a corn-corn rotation and corn-other rotation and decreases the area of other-other  
986 rotation. We also find that an increase in the price of other crops decreases the area of rotations  
987 with corn and increases the area of an other-other rotation. Corn-corn and other-other rotations  
988 are elastic with respect to the price of corn, in part because the area of corn-corn and other-other  
989 rotations are smaller than a corn-other rotation.

990 Table S15 reports the aggregate corn acreage elasticity. We estimate a long-run own-  
991 price elasticity of 0.574 and a cross-price elasticity of -0.467. In other words, a 10% increase in  
992 the price of corn increases corn acreage by 5.74% across the nation, holding constant the price  
993 of other crops. The cross-price elasticity is similar in magnitude to the own-price elasticity, but of  
994 the opposite sign.

995 We estimate that the 2007 RFS increased annual corn extent by 2.8 Mha across our  
996 modeled region, which included about 91.6% of corn area in the U.S. Assuming a similar  
997 increase in the remaining areas of the country suggests there were approximately 3.0 Mha of  
998 additional corn each year following the RFS. According to the USDA, farmers planted an average  
999 of 37.0 Mha of corn annually between 2009-16. Therefore our estimate implies that farmers would  
1000 have planted only 34.0 Mha of corn on average during this period had the RFS not occurred,  
1001 which suggests that about 8.2% of the current corn extent is attributable to the policy. More  
1002 broadly, the area planted to corn increased 5.1 Mha between the periods 1999-2006 and 2009-  
1003 16. Thus, while several factors played a role in this expansion, we attribute roughly 60% of the  
1004 recent increase to the 2007 expansion of the RFS. Absolute increases in corn area were largest  
1005 in North Dakota, South Dakota, and northwestern Minnesota (Fig. S1, a-c). Relative to existing  
1006 corn extent, the Mississippi Alluvial Plain and the Columbia Plateau region of Oregon and  
1007 Washington experienced the greatest transformations, with more than a 100% increase due to  
1008 the RFS (Fig. S1, d-f). In other words, roughly half of the current corn area in these locations can  
1009 be attributed to the RFS.

1010 This proliferation of corn occurred through changes in its rotation pattern relative to other  
1011 crops. For example, the area of continuous corn rotations (i.e. corn planted as successive crops)  
1012 increased by 2.1 Mha [95% CI: 1.8, 2.3] due to the RFS or 47% [36%, 63%] relative to BAU, with  
1013 greatest influence in the Upper Midwest (Fig. S1). To accommodate this increase in corn  
1014 monoculture, the area of non-corn (i.e. other) crops planted in back-to-back years decreased by  
1015 3.4 Mha [2.6, 4.2] or 10.8% [7.8%, 13.6%]. The area of corn planted in rotation with other crops  
1016 varied by region throughout the US. In core agricultural locations, where rotation with other crops  
1017 was already common (e.g., Iowa, Illinois, and Nebraska), there was a reduction in corn-other  
1018 rotations associated with the shifting trend toward increased continuous corn production. On the  
1019 other hand, in areas previously dominated by other crops, like soybeans and wheat (e.g., North  
1020 Dakota, South Dakota, and the Mississippi Alluvial Plain), more corn was added to the landscape  
1021 via rotation with other crops. In total across the study region, the area of corn-other rotations  
1022 increased by 1.4 Mha [0.8, 1.9] or 4.6% [0.8%, 8.3%].

1023 Supplementary results for water quality impacts from crop rotations

1024 Continuous corn cropping systems generate on average 163% more nitrate leaching than  
1025 continuous soybean and 145% more than continuous wheat systems (Table S16). These larger  
1026 losses of nitrate for continuous corn are driven primarily by the larger amount of nitrogen fertilizer  
1027 inputs for corn compared to the other cropping systems (Table S17). Patterns of nitrate leaching  
1028 across the US (Fig. S22) reveal higher values for all cropping systems within the Corn Belt and  
1029 the Mississippi Alluvial Plain, where substantial mineralization of nitrogen occurs due to soils rich  
1030 in organic matter, where historical applications of nitrogen fertilizer were high, and where  
1031 additional high inputs are currently applied. Nitrate leaching is also high in heavily irrigated  
1032 regions in Nebraska and the Mississippi Alluvial Plain where nitrogen is more easily mobilized via  
1033 irrigation-induced drainage. Lastly, areas with coarser soils and more precipitation are also  
1034 subject to heightened drainage and leaching of nitrate (e.g. northern part of the Mississippi  
1035 Alluvial Plain).

1036 Regarding soil erosion and phosphorus runoff, continuous corn also leads to the largest  
1037 impacts compared to other cropping systems, with 56% and 71% more soil loss and 58% and  
1038 40% more phosphorus runoff compared to continuous soy and continuous wheat systems,  
1039 respectively. This is mainly due to the relatively high erosion risk associated with continuous corn  
1040 relative to the other systems, and partially due to high P input for continuous corn relative to the  
1041 other systems.

1042 Variation in soil erosion and sediment loss (Fig. S23) is primarily driven by slope and  
1043 runoff, with finer-grained soils and higher precipitation also contributing to this susceptibility.  
1044 Phosphorus is bound to soil, so steeper slopes, finer-grained soils, and higher precipitation also  
1045 lead to higher phosphorus losses. In addition, phosphorus can be lost downstream in dissolved  
1046 form and the amount is dependent on its concentration in soil at the ground surface.  
1047 Overapplication of phosphorus can build up this surface soil concentration and lead to higher risk  
1048 of dissolved and soil-bound phosphorus. Spatial patterns of phosphorus runoff (Fig. S24) thus  
1049 show higher values in areas with steeper slopes (e.g., western Iowa) and historical legacies of  
1050 heavy application of fertilizer and manure phosphorus.

1051 We calculated the differential impact of continuous corn versus the four other cropping  
1052 systems to visualize where the impacts of continuous corn may be both greatest and least  
1053 substantial (Table S18 and Fig. S25-S27). Maps of this difference (continuous corn vs. other  
1054 systems) reveal a variable pattern where the vast majority of areas show much higher differential  
1055 impacts while very few areas show slightly less. For nitrate leaching, the largest differences (i.e.,  
1056 where continuous corn has greatest impact) occur in the regions with the highest nitrate leaching  
1057 values (Corn Belt and Mississippi Alluvial Plain), which shows that the impacts of changes in crop  
1058 type are highest in the areas of most intense production. These high differential impacts are  
1059 primarily driven by more nitrogen inputs for continuous corn relative to the other cropping systems  
1060 (Table S17 and Fig. S28). The only area to show a slightly lower impact from continuous corn is  
1061 in the south-central Mississippi Alluvial Plain, with wheat. Here the difference in primary  
1062 production between corn and wheat is the largest (corn higher than wheat) and this leads to both  
1063 relatively large differences in nitrogen uptake (more uptake by corn) and slightly more water use  
1064 (less drainage in the corn system). Thus nitrate leaching is slightly less for continuous corn  
1065 compared to continuous wheat even though the nitrogen inputs for wheat are less than 50% of  
1066 that for corn.

1067 The differential impact maps for phosphorus are also quite variable, however most areas  
1068 show continuous corn to have greater impacts than the other cropping systems. This is primarily  
1069 driven by two factors: inputs of P are higher for corn (Fig. S29), and corn is more susceptible to  
1070 erosion compared to the other cropping systems. The highest differences occur in regions where  
1071 the slope is relatively steep (e.g., southwestern Iowa). The only regions where continuous corn  
1072 has slightly less phosphorus impact than other systems are in northwestern Iowa and the  
1073 southern part of the Mississippi Alluvial Plain. In northwestern Iowa, high manure P inputs lead to  
1074 high surface soil P concentrations for both corn and wheat but slightly less for corn because  
1075 primary production is higher than wheat. In the southern Mississippi Alluvial Plain, higher primary  
1076 production for corn leads to more mining of soil P and lower surface soil P concentrations relative  
1077 to wheat. Low slopes in this region also minimize the differences in soil loss (and soil-bound P)  
1078 between corn and wheat.

#### 1079 Supplementary results for cropland area

1080 The validity of the cropland transition model was also assessed by comparing predicted  
1081 versus observed land use. Figure S30 shows the predicted area of cropland compared to the  
1082 observed area over time and figure S31 shows the same for the area of cropland transitions. The  
1083 predicted area follows the same pattern as the observed area over time. The largest difference  
1084 was in 2001 where the National Resources Inventory indicated a large transition from cropland to  
1085 pasture that is not predicted by the model. On average, the predicted area of cropland is within  
1086 0.2% of the observed area. Figure S32 indicates that the model does well at predicting the Land  
1087 Resource Region where cropland transitions occurred as well. The model predicts large  
1088 transitions from CRP to cropland between 2007 and 2012 in Land Resource Regions where large  
1089 transitions were observed.

1090 Table S19 reports cropland transition elasticities. These elasticities indicate the percent  
1091 change in transitions due to a 1 percent increase in the price of crops, pasture rent, or CRP rent.  
1092 The elasticities are relatively large because they represent the percent change in transitions—not  
1093 the percent change in final land use—and there are relatively few transitions. The price of crops  
1094 has no significant impact on aggregate transitions between cropland and pasture. Elasticities of  
1095 cropland transitions with CRP all have the expected sign and are statistically significant. When  
1096 crop prices increase by 10%, the transitions from CRP to cropland increase by 73.5% and  
1097 transitions from cropland to CRP decrease by 12.18%. An increase in CRP rental rates  
1098 decreases exits from CRP to cropland and increases enrollment of cropland to CRP.

1099 The five-year elasticities of aggregate cropland area with respect to prices are reported in  
1100 table S20. Five-year elasticities are reported as a medium-run elasticity relevant to the time frame  
1101 of our modeling. We estimate an elasticity of cropland with respect to crop prices of 0.071—a  
1102 10% increase in crop prices increases cropland area by 7.1%. This elasticity of 0.071 is likely  
1103 larger than the national cropland elasticity implied by our model because we only consider the  
1104 areas of the United States with substantial corn growing area and these areas are likely more  
1105 responsive to crop prices than areas outside our analysis. Our estimate is similar in magnitude to  
1106 other estimates from the literature. Previous estimates include the following: 0.07 (Li, Miao, and  
1107 Khanna, 2019 (75)); 0.16-0.20 (Claassen, Langpap, and Wu, 2016 (30)); 0.05 for a 5-year  
1108 elasticity (Ahmed, Hertel, and Lubowski (2009)(76) using the model estimates of Lubowski,  
1109 Plantinga, and Stavins (2008)(26)); and 0.03 (Barr, et al., 2011)(77). Langpap and Wu (2011)

1110 estimate an elasticity with respect to corn price of 0.059 in the Corn Belt and 0.142 in the Lakes  
1111 States (29). The estimate of Langpap and Wu (2011) would be even larger if it included an  
1112 increase in all crop prices as we estimate. Our estimate of the elasticity of cropland with respect  
1113 to pasture rent is the opposite sign that was expected, perhaps because we do not have as  
1114 accurate a measurement of pasture rents. The effect of CRP rental rates on cropland area is  
1115 negative, as expected, and more inelastic than the effect of crop prices.

1116 Overall, across transitions between cropland and noncropland (including pasture and  
1117 CRP), we found that cropland expansion increased by 1.8 Mha [95% CI: 1.5, 2.1] and  
1118 abandonment decreased by 0.4 Mha [0.1, 0.6] due to the RFS (Table S21). Combined, this  
1119 resulted in a net increase of 2.1 Mha of cropland area that can be attributed to the RFS for years  
1120 2009-16. Note that for the model simulation and all related results, we predicted changes for  
1121 eight conversion years, with the first transitions occurring between the 2008-09 growing season  
1122 and the final transitions occurring between 2015-16. This approach may thus underestimate the  
1123 total extensive margin land response to the RFS, as some land likely came into initial production  
1124 prior to the 2009 growing season and after the 2016 growing season. Each of these aggregate  
1125 changes in cropland area due to the RFS were significant at the 5% level. The largest increase  
1126 due to the RFS was in the region *Mgrass* where expansion grew by 0.76 Mha and abandonment  
1127 decreased by 0.26 for an overall increase of 1.0 Mha. Region *F* also saw an increase of 0.63 Mha  
1128 and region *H* had an increase of 0.38 Mha due to the RFS.

1129 Specific examinations of the subset of transitions between cropland and pasture revealed  
1130 no statistically significant evidence that the increase in cropland returns due to the RFS increased  
1131 conversion of pasture to cropland (Table S22). However, in region *Mgrass* we estimated an  
1132 increase in conversions of about 0.12 Mha, which is about an 18% increase in the average  
1133 number of conversions. Some of the estimates of cropland expansion show an unexpected  
1134 negative sign, but only one is significant at the 10% level.

1135 Instead, we found stronger evidence that the increase in cropland returns decreased the  
1136 amount of cropland that transitioned to pasture. In region *Mgrass*, we estimated that about 0.21  
1137 Mha that were not abandoned would otherwise have been in the absence of the RFS. This effect  
1138 is statistically significant at the 5% level. We also found significant evidence of reduced  
1139 abandonment in the *KL* region. Our net estimate is that cropland area increased by only 0.06 Mha  
1140 through transitions with pasture due to the RFS. However, the impacts differed by region and  
1141 there was an 0.33 Mha increase in cropland in the *Mgrass* region due to transitions with pasture  
1142 that is significant at the 5% level.

1143 In contrast to the transitions with pasture, we found large and statistically significant  
1144 impacts of the RFS on cropland conversions specifically with the CRP (Table S23). The largest  
1145 increases in cropland expansion from the CRP occurred in regions *F* and *Mgrass* where they  
1146 increased by over 0.63 Mha in each region due to the RFS. Region *H* also saw an increase in  
1147 conversions of 0.32 Mha.

1148 The increase in crop prices not only increased cropland expansion from CRP but also  
1149 decreased the area of associated cropland abandonment (i.e., enrollment into CRP). Enrollment  
1150 of cropland into CRP decreased by about 0.05 Mha in regions *F* and *Mgrass* and about 0.10 Mha  
1151 in region *H*. Overall, net cropland area increased by 2.1 Mha due to the RFS from changes in  
1152 transitions between cropland and the CRP.

1153 We can compare our aggregated results to national-level data from the NRI to estimate  
1154 the relative contribution of the RFS to all land use changes observed over the study period to put  
1155 each change in perspective. Of note, cropland area had been trending downward from 1982-  
1156 2007. Had the most recent trend from 1992-2007 continued, cropland area would have been 7.8  
1157 Mha lower than it actually was in 2015. Instead, cropland area increased nationally by 3.0 Mha  
1158 from 2007-15, in part due to the RFS, but also due to several other factors. One estimate of  
1159 cropland area without the RFS is shown as the point in Fig. S33 and is calculated as the 2015  
1160 NRI cropland area minus the impact of the RFS — simulated between 2008-15 for consistency  
1161 with the NRI endpoints. This indicates that about 24% of the difference between trendline  
1162 cropland area and actual 2015 area is due to the RFS, or that the increase in cropland area in  
1163 2015 was 32% greater than it would have been in the BAU.

1164 Another way to assess the relative changes is to look at the contribution of the individual  
1165 components of cropland area change, i.e., cropland expansion and reduced abandonment. From  
1166 2007-15, the NRI reports total cropland expansion of 8.7 Mha or an average of 1.1 Mha yr<sup>-1</sup>. We  
1167 estimate 1.8 Mha or 0.2 Mha yr<sup>-1</sup> of expansion due to the RFS, which is 21% of the total observed  
1168 by the NRI and 26% larger than what would have occurred without the RFS (Table S2). In a  
1169 similar fashion, the NRI identified 5.6 Mha or 0.7 Mha yr<sup>-1</sup> of abandonment 2007-15. We estimate  
1170 this had been lessened by 0.4 Mha or 0.04 Mha yr<sup>-1</sup> due to the RFS, which is 6.3% of the amount  
1171 identified by the NRI or 5.9% less than would have occurred without the RFS.

#### 1172 Supplementary results for water quality impacts of cropland area

1173 The water quality impact of recent cropland expansion and abandonment depends on the  
1174 amount of land converted as well as the spatially variable impact intensity (impact per unit area)  
1175 of converting from cropland to non-cropland and vice versa. We calculated county-level average  
1176 impact intensities (loss per unit area) to visualize the county-specific differential impacts between  
1177 cropland and non-cropland (Fig. S34). These impact intensities reveal substantial spatial  
1178 variability for nitrogen, phosphorus, and sediment. Across all three variables, however, almost all  
1179 counties had a higher impact associated with cropland than with non-cropland (shades of red in  
1180 Fig. S34).

1181 Areas with higher impact intensity for nitrate leaching tended to have coarser grained  
1182 soils that are more susceptible to high drainage and leaching and have larger inputs of N  
1183 fertilizer. High sediment yield impact intensities largely accompanied areas of steeper slopes  
1184 (e.g., Appalachia and the Driftless Area of southwestern Wisconsin). Spatial patterns of  
1185 phosphorus runoff intensities were similar to soil erosion due to the connection between erosion  
1186 and sediment-bound phosphorus. However, higher phosphorus inputs to cropland (e.g. southeast  
1187 US) also contributed to higher phosphorus impact intensities. The only region with slightly  
1188 negative phosphorus impact intensities was the southern Mississippi Alluvial Plain where corn  
1189 and soybeans are highly productive and able to uptake and reduce soil surface phosphorus  
1190 concentrations more than non-cropland. Thus, the lower soil surface P and its low slope (very  
1191 minimal erosion) led to lower P losses for cropland.

1192 While the impact intensity results were primarily used to assess the parcel-level impacts  
1193 attributed specifically to the RFS (see main text results), we also present here the total impacts –  
1194 due to the RFS or otherwise – of all recent cropland expansion and abandonment to help  
1195 understand the broader underlying trends and spatial patterns. Net impacts at the county level for  
1196 all cropland expansion and abandonment were calculated for nitrate leaching, soil erosion, and

1197 phosphorus runoff by accounting for the total impact (intensity x area) associated with cropland  
1198 expansion and subtracting the total impact associated with abandonment. We then divided this  
1199 total net impact per county by the total county land area to create a normalized net impact (mass  
1200 per county unit area) for visualization. Nationwide net impacts for all cropland expansion and  
1201 abandonment for nitrate leaching, phosphorus runoff, and soil erosion were 81.2 Gg, 0.931 Gg,  
1202 and 903 Gg, respectively. Areas of high net impacts for nitrate leaching included the eastern  
1203 Dakotas, northeastern Nebraska, southern Iowa, western Kentucky, and western North Carolina  
1204 (Fig. S35). High net impacts for sediment and phosphorus yield occurred mostly in southern Iowa,  
1205 western Kentucky, southwestern Wisconsin, and western North Carolina.

#### 1206 Supplementary results for greenhouse gas (GHG) emissions from land use change (LUC)

1207 We found total ecosystem carbon emissions of 397.7 Tg CO<sub>2</sub>e associated with the 2.1  
1208 Mha of additional cropland due to RFS. Following the approach of the EPA's regulatory impact  
1209 analysis (RIA) (73), we amortize these emissions over a 30-year period, which equates to  
1210 annualized emissions of 13.3 Tg CO<sub>2</sub>e yr<sup>-1</sup>. These emissions were induced by a modeled 20.8  
1211 billion liters per year increase in ethanol demand due to the RFS, which suggests emissions of  
1212 approximately 637 g CO<sub>2</sub>e per liter or a domestic ecosystem carbon LUC emissions factor of 29.7  
1213 g CO<sub>2</sub>e MJ<sup>-1</sup>.

1214 In addition to these one-time emissions associated with land conversion, there are  
1215 additional, ongoing emissions of nitrous oxide from the annual fertilizer applied to the additional  
1216 cropland extent. We estimate these emissions at 1.3 Tg CO<sub>2</sub>e yr<sup>-1</sup>, which equates to an  
1217 emissions intensity of 61.4 g CO<sub>2</sub>e per liter of increased annual ethanol demand or 2.9 g CO<sub>2</sub>e  
1218 MJ<sup>-1</sup> (Table S3). Including nitrous oxide emissions from crop rotation changes due to the RFS  
1219 further raise land use nitrous oxide emissions to 4.1 Tg CO<sub>2</sub>e yr<sup>-1</sup>, 194.6 g CO<sub>2</sub>e per liter, and 9.1  
1220 g CO<sub>2</sub>e MJ<sup>-1</sup>.

1221 Several factors may cause these LUC GHG emissions estimates to be conservative,  
1222 particularly for those associated with changes to cropland extent. First, recently expanded  
1223 croplands are typically planted on lower quality land because the highest quality land is already in  
1224 production (32, 78). Thus, the yields of corn planted on new croplands are lower, leading to lower  
1225 yields of ethanol and higher emissions per volume of ethanol produced. New croplands planted  
1226 to corn during the study period yielded, on average, 8% less than the national average (37),  
1227 suggesting that the emissions per liter of ethanol produced from new croplands may be higher  
1228 than that for average croplands reported here.

1229 Second, we attribute 2.1 Mha of cropland area change 2008-16 to the 20.8 billion liter  
1230 increase in annual ethanol demand from the RFS. However, it is likely that some land was  
1231 converted to cropland due to the RFS prior to and following this period, thereby increasing the  
1232 total area of LUC and emissions that should be attributed to the policy and associated ethanol  
1233 demand.

1234 Third, we quantify only the emissions from ecosystem carbon fluxes and onsite nitrous  
1235 oxide due to fertilizer application. However, we also show substantial increases in nitrate  
1236 leaching, phosphorus runoff, and sedimentation, each of which has been shown to increase GHG  
1237 emissions from rivers, lakes, or other water bodies (79–81). Accounting of such downstream  
1238 emissions would thus further increase emissions associated with RFS-induced LUC.

1239           Conversely, our model of ecosystem carbon losses is notably agnostic towards  
1240 management practices used after conversion and may therefore overestimate losses in some  
1241 instances. Ecosystem C losses, particularly those sourced from soil organic matter, often play out  
1242 over several decades. While the general trajectory tends to be that of C loss when natural  
1243 ecosystems are converted to cropland and C gain from the opposite transition, there exist some  
1244 ensuing management practices that can alter these trajectories to varying degrees by enhancing  
1245 rates of C sequestration or slowing rates of C loss. Reduced-, conservation-, and no-tillage  
1246 practices, for example, have been shown in some cases to minimize or even reverse soil C  
1247 losses from some production systems (82). Non-conventional tillage regimes, however, are still  
1248 not yet widely used in the United States, with only 37% of U.S. croplands adopting any type of  
1249 reduced tillage in 2017 (83). Furthermore, rates of long-term no-till adoption remain significantly  
1250 lower (84), and field studies suggest that even intermittent tillage can entirely undermine the C  
1251 gains attained during intervening periods of no-till (85, 86). Lastly, the activity of converting  
1252 grassland to crops frequently entails at least initial tillage to break up soil prior to subsequent  
1253 cultivation. Because the largest relative C losses tend to occur in the year(s) immediately  
1254 following conversion – before the effects of ensuing management might flatten the emissions  
1255 curve – it is therefore likely that the act of conversion itself is more influential than ensuing  
1256 management decisions in terms total C impacts of conversion. Thus, while our results collectively  
1257 reflect the most common management and C outcome from land conversion, it is possible that  
1258 emissions could be reduced or amplified based on subsequent management decisions.

1259           Our GHG emissions analyses are designed to be comparable to those of the EPA  
1260 Regulatory Impact Analysis (RIA) (73), yet our findings differ in both the magnitude of estimated  
1261 LUC area as well as the net impact on emissions. For example, the EPA's RIA scenario for  
1262 ethanol production uses the FASOM model to estimate that by 2022, there would be 0.36 Mha of  
1263 increased cropland area, primarily coming from land classified previously as cropland-pasture.  
1264 However, there are also simultaneous increases in forest pasture by 0.08 Mha acres and a  
1265 decrease in forestland by 0.01 Mha. Though individual land use change contributions to  
1266 emissions are not identified in the RIA, it is likely that the relatively small magnitude of predicted  
1267 domestic cropland extensification along with forest increases attributed to the RFS are at least in  
1268 part responsible for the unlikely net sequestration estimated for domestic LUC by the RIA.

1269           Along with those changes to broad land use areas, the RIA estimates shifts in crop  
1270 planting patterns and associated N<sub>2</sub>O emissions. For example, the RIA estimated an increase of  
1271 1.5 Mha of corn and a decrease of 0.5 Mha in soybeans, as well as changes in other crop  
1272 extents. FASOM was then used to sum all emissions associated with agricultural land (CO<sub>2</sub> and  
1273 N<sub>2</sub>O from cropland, pastureland, CRP land) and forestland (CO<sub>2</sub> from biomass, soil, and forest  
1274 products) between the years 2000-22 for the control and their fuel-specific scenarios. Again,  
1275 individual LUC contributions to emissions are not enumerated, but rather the difference between  
1276 the control and baseline scenarios represents the change in total GHG emissions due to  
1277 domestic LUC, and cumulative emissions are distributed across a 30-year time horizon after 2022  
1278 (with a 0% discount rate) to account for the variable timing of LUC GHG impacts. From all shifts  
1279 in domestic land use – from both broad agricultural area and crop planting patterns – the RIA  
1280 estimates emissions of -4.0 kg CO<sub>2</sub>e mmBtu<sup>-1</sup> or -3.8 g CO<sub>2</sub>e MJ<sup>-1</sup> for corn grain ethanol (p. 362)  
1281 (73).

1282           Looking more broadly at the overall emissions identified in the RIA, it is worth noting that  
1283 the primary estimate upon which the regulatory compliance of corn ethanol was determined  
1284 reflects projected improvements in feedstock production and refining processing that were  
1285 anticipated to occur by 2022. Similar estimates were also made for the GHG intensities of corn



1286 ethanol production for the years 2012 and 2017. For example, the estimated carbon intensities  
1287 (CI) for a base plant (corn ethanol dry mill with dry DDG and using natural gas for its process  
1288 energy source) were already 33% and 10% higher than gasoline, respectively, and would rise to  
1289 79% and 56% higher after incorporating our results of domestic LUC (73). As such, the average  
1290 CI of corn ethanol produced over the life of the RFS program from its inception to present day is  
1291 likely higher than that projected for 2022. We focused on results for 2022, however, as these  
1292 projections received the most vetting during the regulatory review process, formed the basis of  
1293 the fuel compliance decisions, and most closely represent current conditions and other recent  
1294 benchmarks.

1295 Other models and assessments provide additional points of comparison for the LUC-  
1296 associated GHG emissions of corn ethanol production. The California Air Resources Board, or  
1297 CARB, implements the Low Carbon Fuel Standard (LCFS). In its original modeling in 2009, the  
1298 LCFS estimated a LUC CI for U.S.-produced corn ethanol of 30 g CO<sub>2e</sub> MJ<sup>-1</sup>, which included  
1299 emissions from both domestic and international LUC combined. In its updated modeling for 2015  
1300 and 2019, this LUC CI factor was reduced to 19.8 g CO<sub>2e</sub> MJ<sup>-1</sup>. This estimate is calculated using  
1301 the GTAP-Bio-AEZ model, and its results are included in the California version of the Greenhouse  
1302 Gases, Regulated Emissions, and Energy Use in Technologies (CA-GREET) (87). Using a  
1303 representative simulation of the GTAP-Bio-AEZ model used in CA-GREET, we estimate 25.5%  
1304 (5.0 CO<sub>2e</sub> MJ<sup>-1</sup>) of the total LUC emissions modeled by the LCFS occur domestically, with the  
1305 remaining 14.8 CO<sub>2e</sub> MJ<sup>-1</sup> attributable to international land use change.

1306 A more general version of GREET developed and distributed by the Argonne National  
1307 Laboratory has been widely used by independent researchers due in part to its noteworthy ease  
1308 of use (88–90). This version of GREET relies on LUC projections generated using the GTAP-BIO  
1309 computable general equilibrium model parameterized with a host of *a priori* assumptions and  
1310 user-selected emissions factors to predict LUC emissions associated with the demand for  
1311 ethanol. Pertaining to domestic (U.S.) LUC associated with corn ethanol, GREET includes two  
1312 LUC scenarios from which users can choose: (i) the “Corn Ethanol 2011” scenario which predicts  
1313 2.1 Mha of LUC with 55% LUC affecting “cropland-pasture”—a land use type equated to lands  
1314 enrolled in the CRP—and (ii) the “Corn Ethanol 2013” scenario which predicts 1.9 Mha of LUC in  
1315 total, 92% of which displaces “cropland-pasture”. Assumptions underlying the latter scenario  
1316 which predicts less LUC have been called into question and shown to almost certainly  
1317 underestimate LUC emissions (91, 92). Note, however, that the total extent of domestic LUC  
1318 predicted by both of these GREET scenarios falls within the 95% confidence interval of our  
1319 independent estimates of gross cropland expansion (1.5-2.1 Mha) and net cropland  
1320 extensification (1.8-2.5 Mha). Thus, the primary difference between these estimates and ours  
1321 stems from the estimated emissions associated with LUC.

1322 Depending on the emissions factors applied to these LUC projections, GREET-based  
1323 estimates of domestic LUC emissions can range from -2.3 g CO<sub>2e</sub> MJ<sup>-1</sup> using GREET’s  
1324 “CENTURY/COLE” emissions factors with the Corn Ethanol 2013 scenario (the negative value,  
1325 here, indicates net sequestration, rather than emission), to at least 9.5 g CO<sub>2e</sub> MJ<sup>-1</sup> when  
1326 GREET’s “Woods Hole” emissions factors are used in conjunction with the LUC predictions of the  
1327 Corn Ethanol 2011 scenario. Note however, that the “CENTURY/COLE” emissions factors  
1328 responsible for the lowest estimates assume that cropland-pasture conversion—the most  
1329 common form of predicted conversion—sequesters carbon, an assumption that is not supported  
1330 by field observations nor independent modeling (92). Note also that the larger emission estimate  
1331 generated using the Woods Hole emissions factors are definitively an underestimate since they  
1332 inexplicably omit all emissions from cropland-pasture conversion. If the cropland-pasture

1333 emission estimate generated using the GREET's "Winrock" emissions factors (5 g CO<sub>2</sub>e MJ<sup>-1</sup>)  
1334 were used in place of the missing Woods Hole equivalent, estimated emissions would rise to 14.5  
1335 g CO<sub>2</sub>e MJ<sup>-1</sup> (84). GREET also provides separate estimates for international land use change  
1336 ranging from 5-5.5 g CO<sub>2</sub>e MJ<sup>-1</sup> based on the Winrock emissions factors (incomplete, smaller  
1337 estimates are also provided based on the Woods Hole emissions factors without explanation).

1338 While both GREET and CA-GREET domestic emissions estimates are lower than ours,  
1339 we note that, with the exception of the questionable "CENTURY/COLE" emissions factors, the  
1340 generalized GREET domestic emissions factors for each land cover type simply represent the  
1341 national average carbon stocks of those lands as inferred from either literature review or sparse  
1342 field inventories and are relatively agnostic to the geographies of land use change. By contrast,  
1343 the approach we use integrates the latest high resolution data on vegetation and soil organic  
1344 carbon stocks with highly resolved patterns of observed LUC to better reflect realized outcomes.  
1345 Validation of our emissions estimates shows good agreement with independent field  
1346 observations, particularly those from grasslands converted to conventionally tilled croplands (69).

1347 It should also be noted that induced LUC, such as that modeled in our study and the  
1348 others referenced here, is just one way of assigning a cost to the use of land. Others have found,  
1349 for example, that if corn devoted to biofuels were replaced with the global average carbon cost of  
1350 producing corn, the induced LUC emissions would be 200 g CO<sub>2</sub>e MJ<sup>-1</sup> (Supplementary Table 4  
1351 of reference (93)). Such references provide a helpful point of comparison, as any estimate of  
1352 LUC less than this value suggests that either an equivalent amount of that crop will not be  
1353 replaced or that it will be replaced at a fraction of the global average cost of production (93, 94).  
1354 Estimates in both the RFS RIA and CARB LCFS, as examples, assume that at least a portion of  
1355 the displaced crops is not replaced within the food supply (94).

1356

1357 **Figs. S1-S35.**

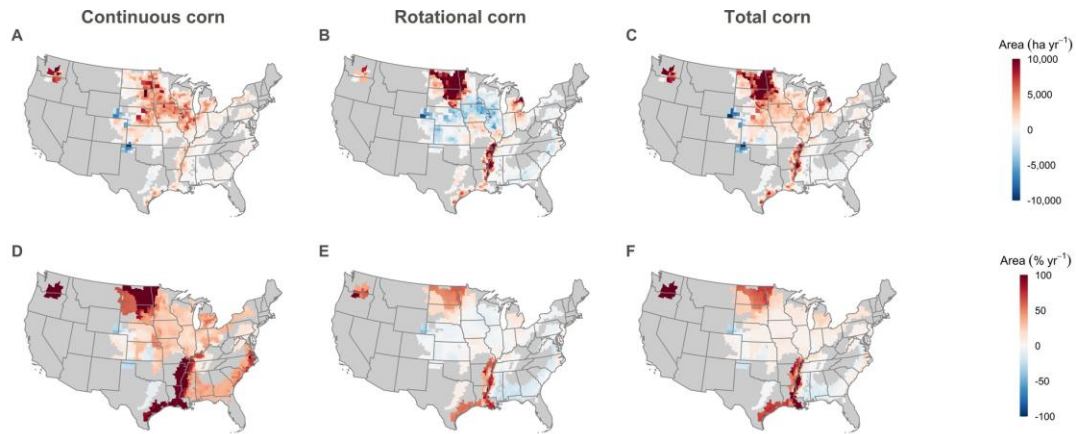

1358

1359 **Fig. S1. Changes in crop rotations due to the RFS. (A-C)** Absolute changes in crop rotation  
1360 area within each county. **(D-F)** Relative changes in crop rotation area, represented as a percent  
1361 of the rotation area in the BAU. Continuous corn represents cropland planted to corn in  
1362 sequential years. Rotational corn represents cropland planted in rotation between corn and  
1363 another crop. Total corn area is equivalent to continuous corn area +  $\frac{1}{2}$  rotational corn area.

1364

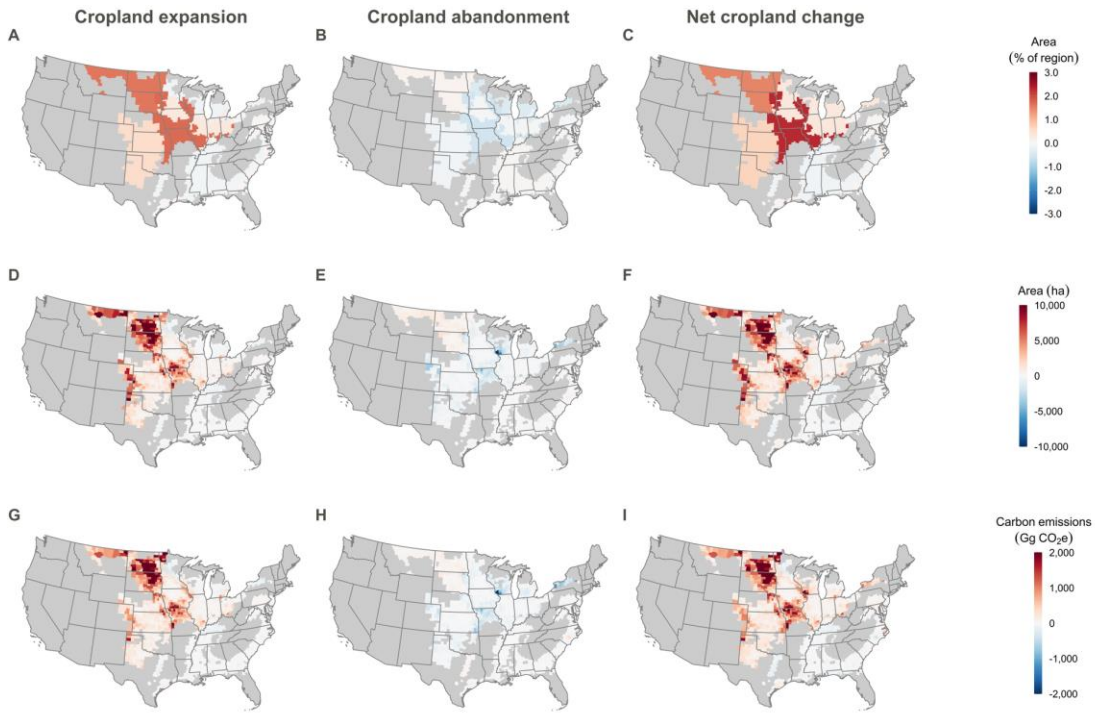

1365

1366 **Fig. S2. Changes in cropland area and associated carbon emissions due to the RFS. (A-C)**  
 1367 **Changes in cropland area as a percent of the total area within each aggregated MLRA region. (D-**  
 1368 **F) Absolute changes in cropland area within each county. (G-I) Changes in associated ecosystem**  
 1369 **carbon emissions.**

1370

1371

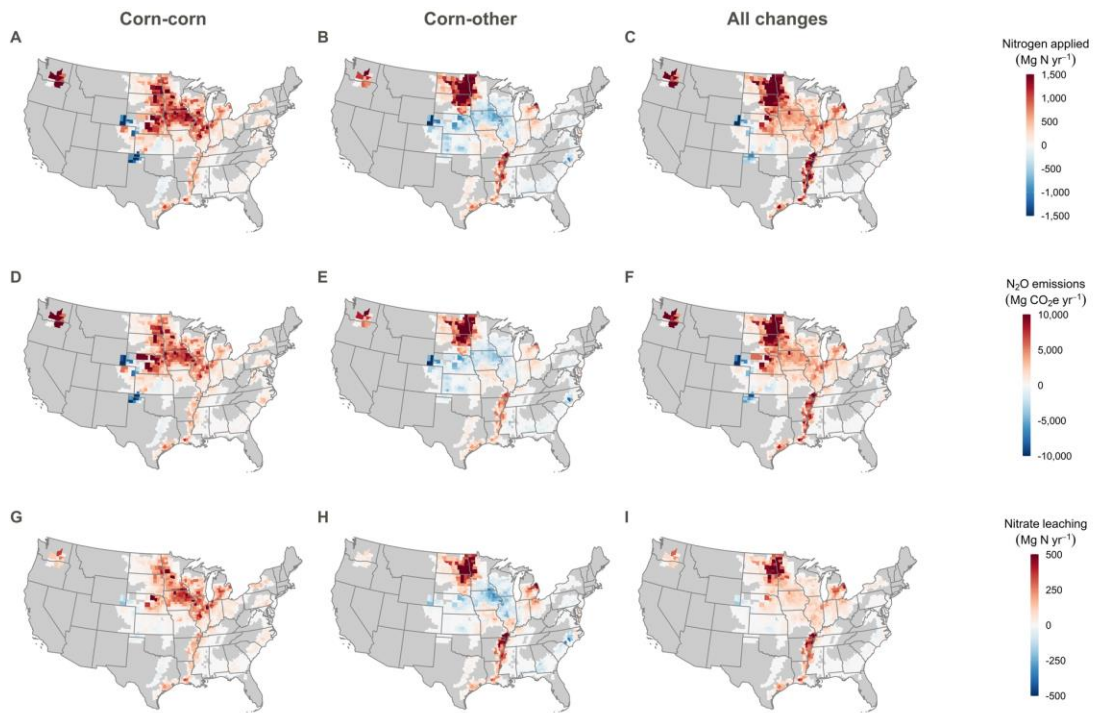

1372

1373 **Fig. S3. Changes in nitrogen-related outcomes due to crop rotation changes under the**  
 1374 **RFS. (A-C) Changes in total applied nitrogen. (D-F) Changes in nitrous oxide (N<sub>2</sub>O) emissions.**  
 1375 **(G-I) Changes in nitrate (NO<sub>3</sub><sup>+</sup>) leaching.**

1376

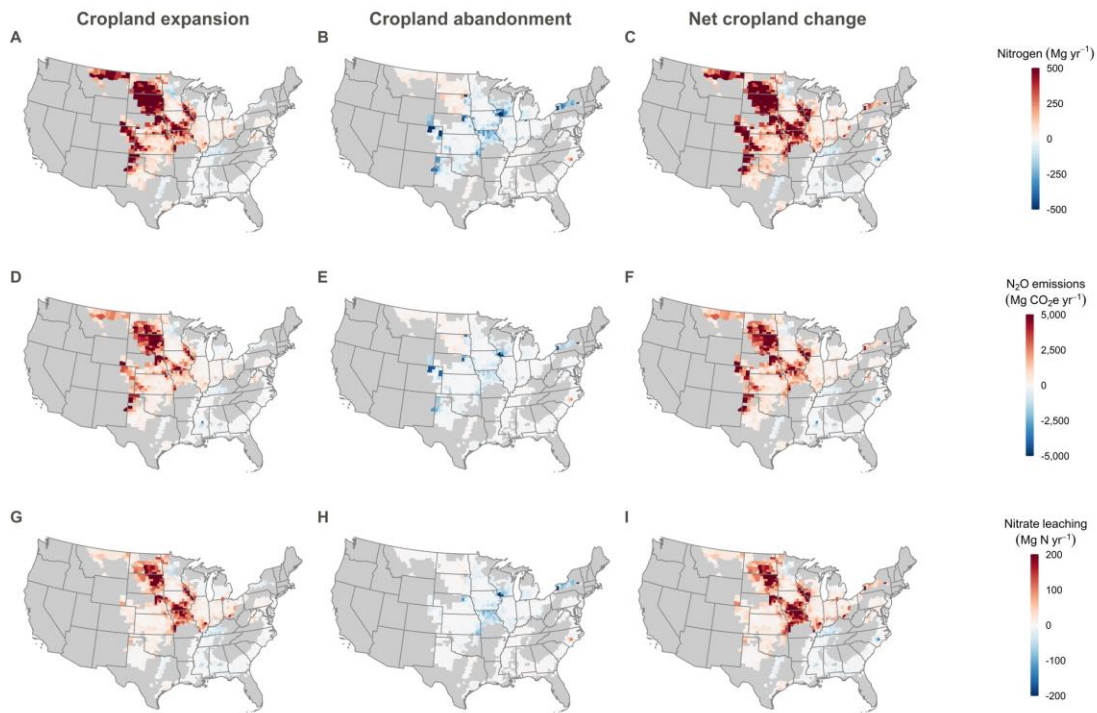

1377

1378 **Fig. S4. Changes in nitrogen-related outcomes due to cropland area changes under the**  
 1379 **RFS. (A-C) Changes in total applied nitrogen. (D-F) Changes in nitrous oxide (N<sub>2</sub>O) emissions.**  
 1380 **(G-I) Changes in nitrate (NO<sub>3</sub><sup>+</sup>) leaching.**

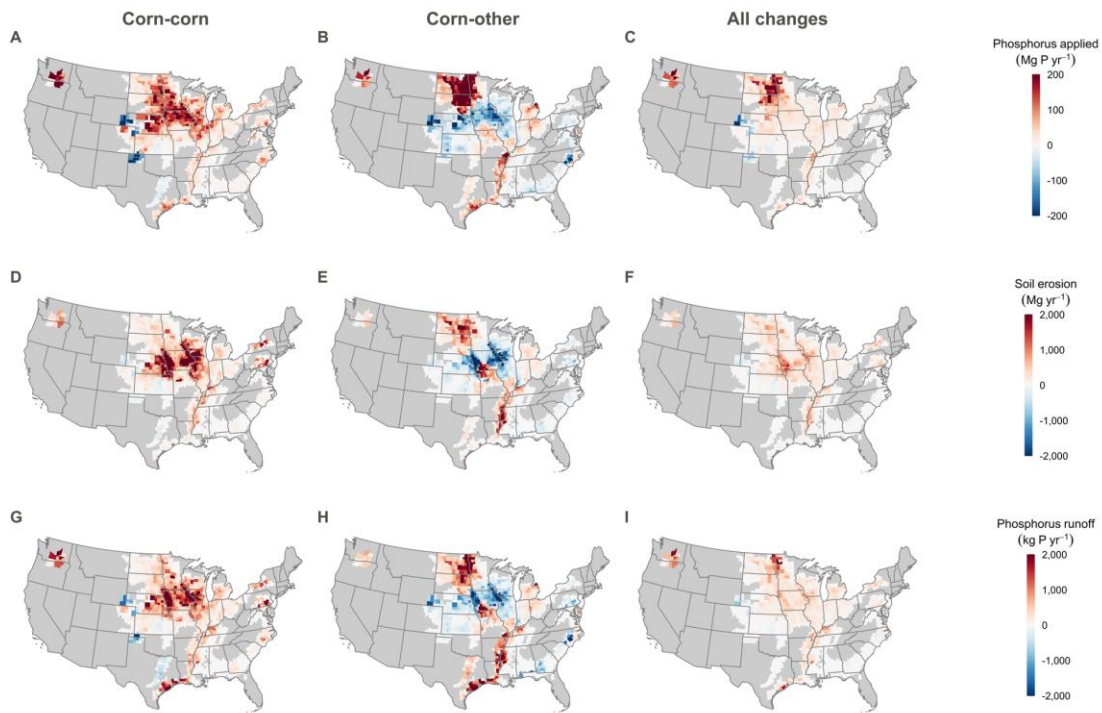

1381

1382 **Fig. S5. Changes in phosphorus and erosion-related outcomes due to crop rotation**  
 1383 **changes under the RFS. (A-C) Changes in total applied phosphorus. (D-F) Changes in soil**  
 1384 **sediment loss. (G-I) Changes in total phosphorus runoff.**

1385

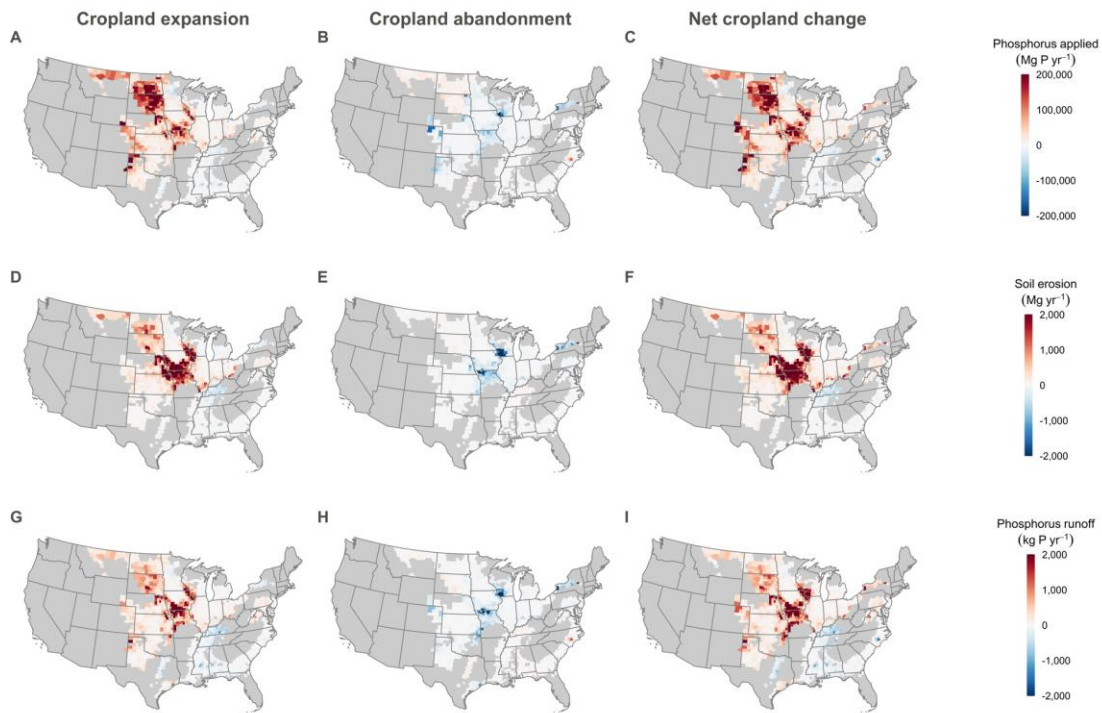

1386

1387 **Fig. S6. Changes in phosphorus and erosion-related outcomes due to cropland area**  
 1388 **changes under the RFS. (A-C) Changes in total applied phosphorus. (D-F) Changes in soil**  
 1389 **sediment loss. (G-I) Changes in total phosphorus runoff.**

1390

1391

1392



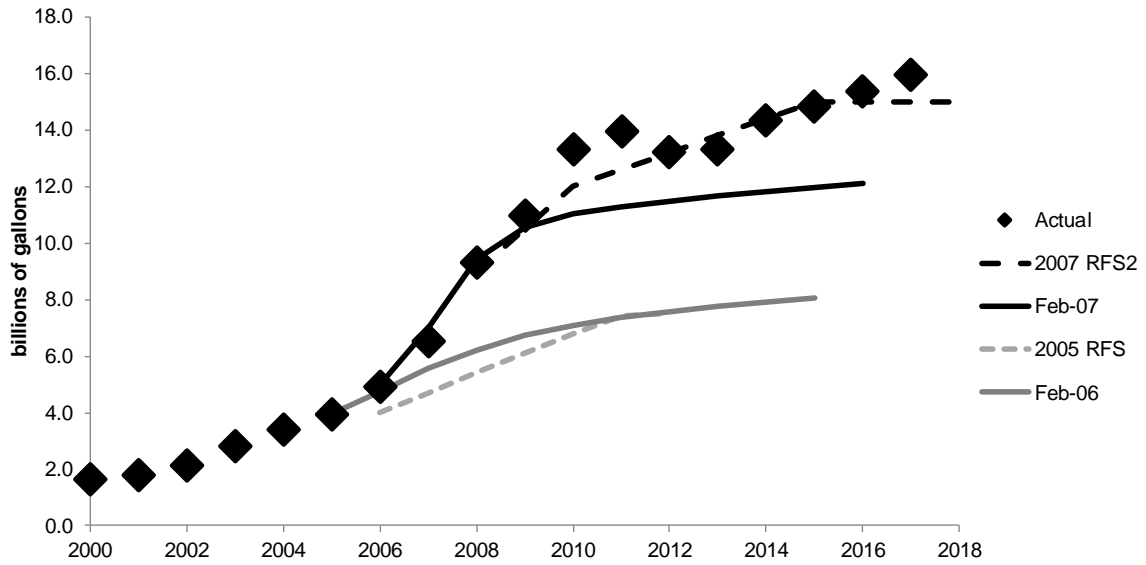

1393

1394 **Fig. S7. Projected, mandated, and actual ethanol production.** Dashed lines represented the  
 1395 amount of conventional renewable fuels mandated by the 2005 and 2007 versions of the RFS.  
 1396 Solid lines represent the amount of production projected by the USDA in February 2006 and  
 1397 February 2007.  
 1398

1399

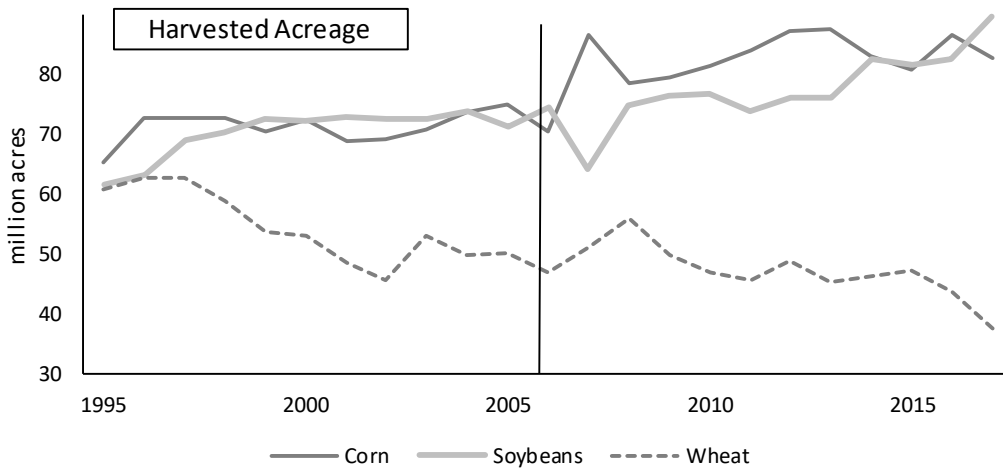

1400

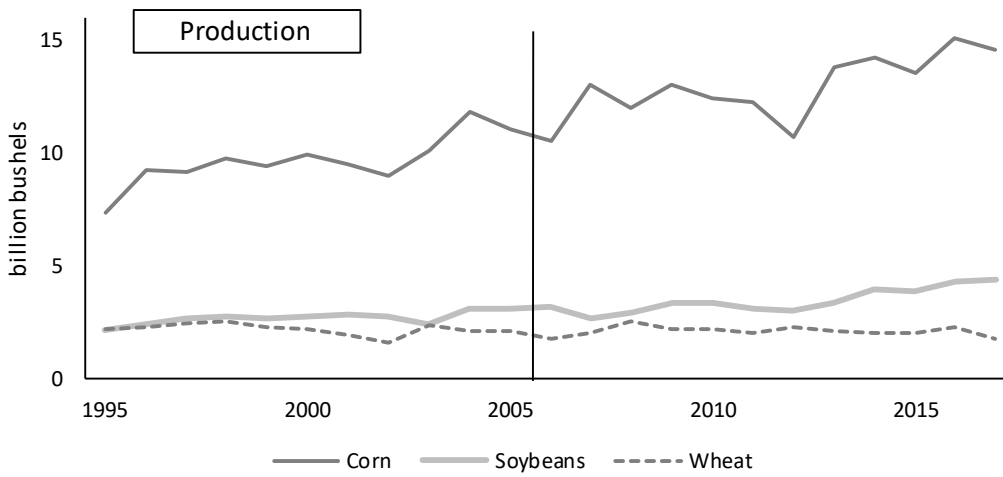

1401

1402

1403

1404

**Fig. S8. Supply of corn, soybeans, and wheat.** Vertical line at 2006 indicates when the 2007 RFS first affected grain markets. Data from USDA (23).

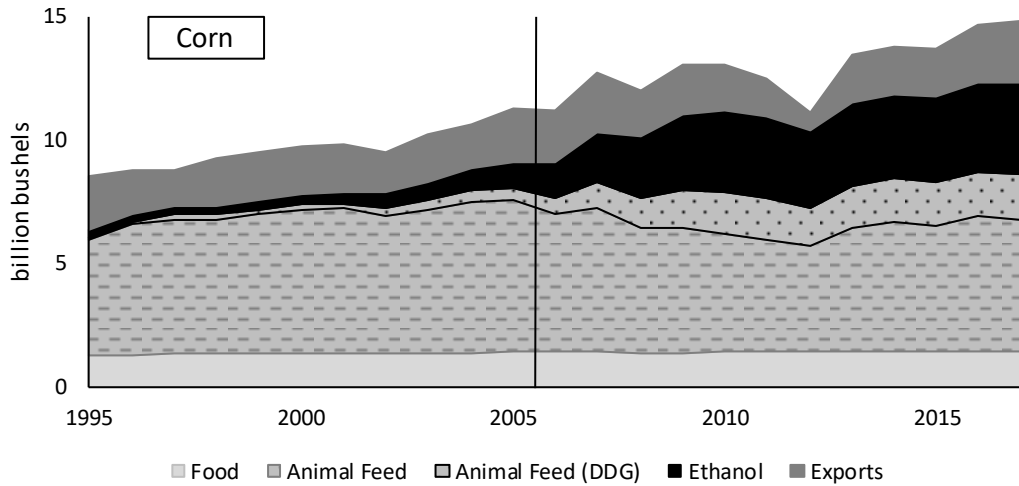

1405

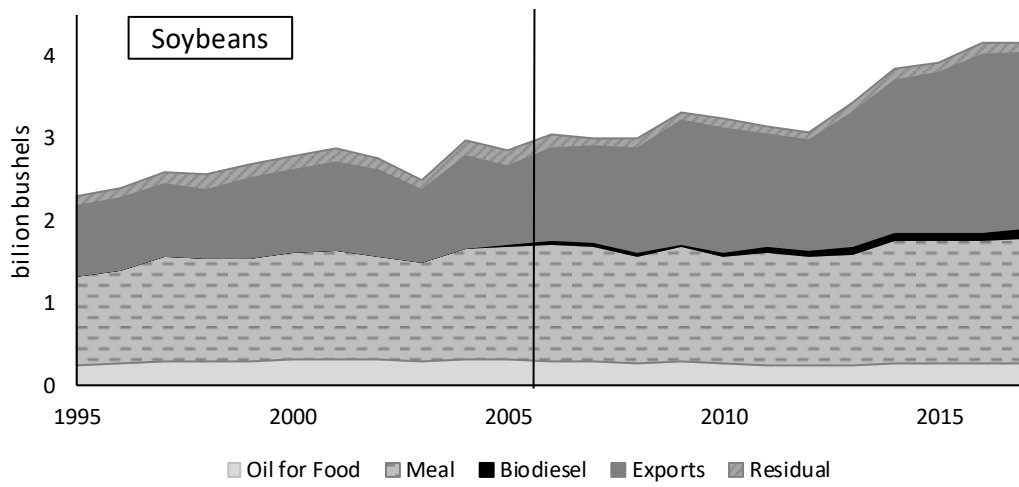

1406

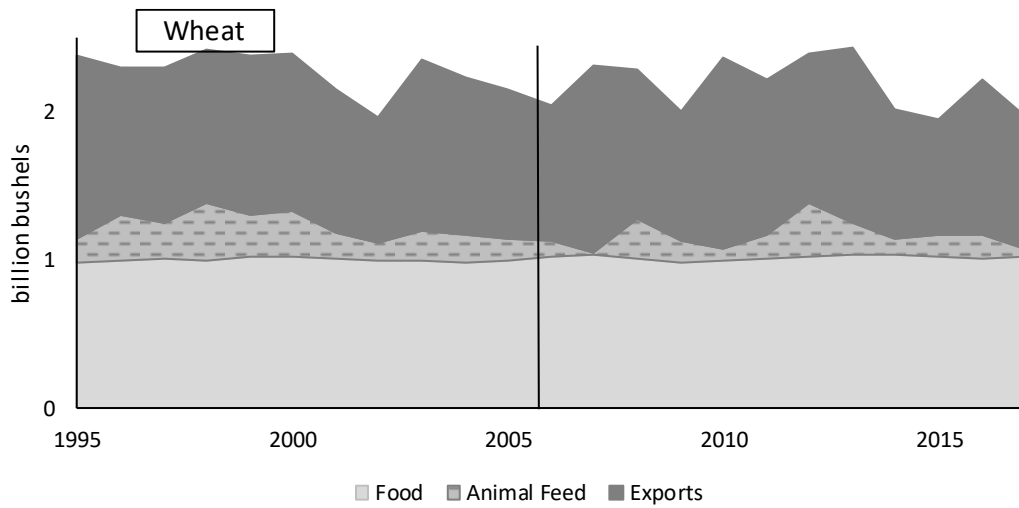

1407

1408

1409

1410

**Fig. S9. Uses of corn, soybeans and wheat in the US.** Vertical line at 2006 indicates when the 2007 RFS first affected grain markets. Data from USDA (23).

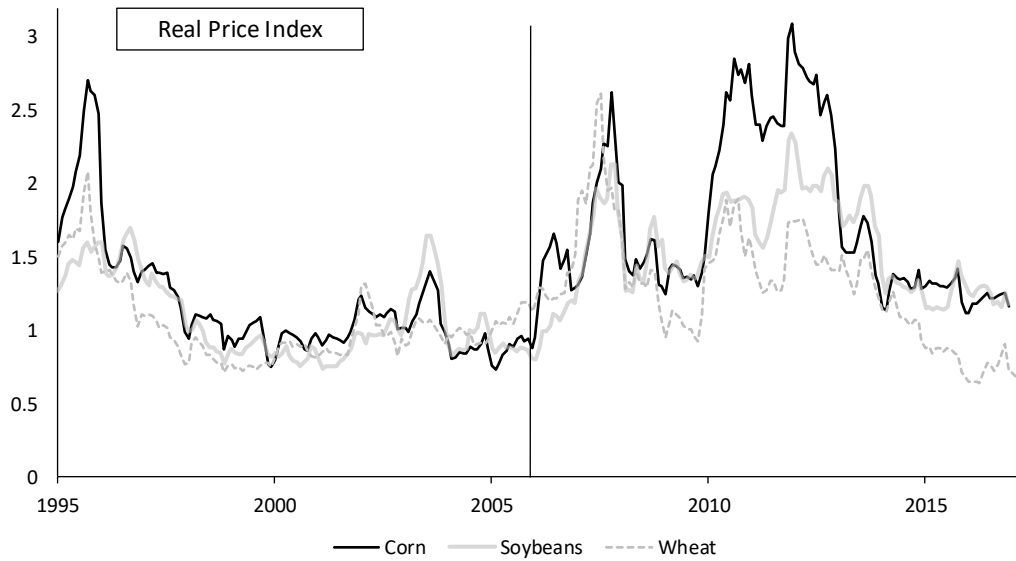

1411  
 1412  
 1413  
 1414  
 1415  
 1416  
 1417  
 1418

**Fig. S10. Real price indexes for corn, soybeans and wheat in the U.S.** Monthly prices deflated using the U.S. consumer price index for all items and indexed to average a value of one across the 2001-05 crop years. Corn and soybean prices are Central Illinois cash bids. Wheat prices are Kansas City hard red winter cash bids. Vertical line at 2006 indicates when 2007 RFS first affected grain markets. Time reflects the crop year, i.e., the label 1995 denotes September 1 of that year. Data from USDA (23).

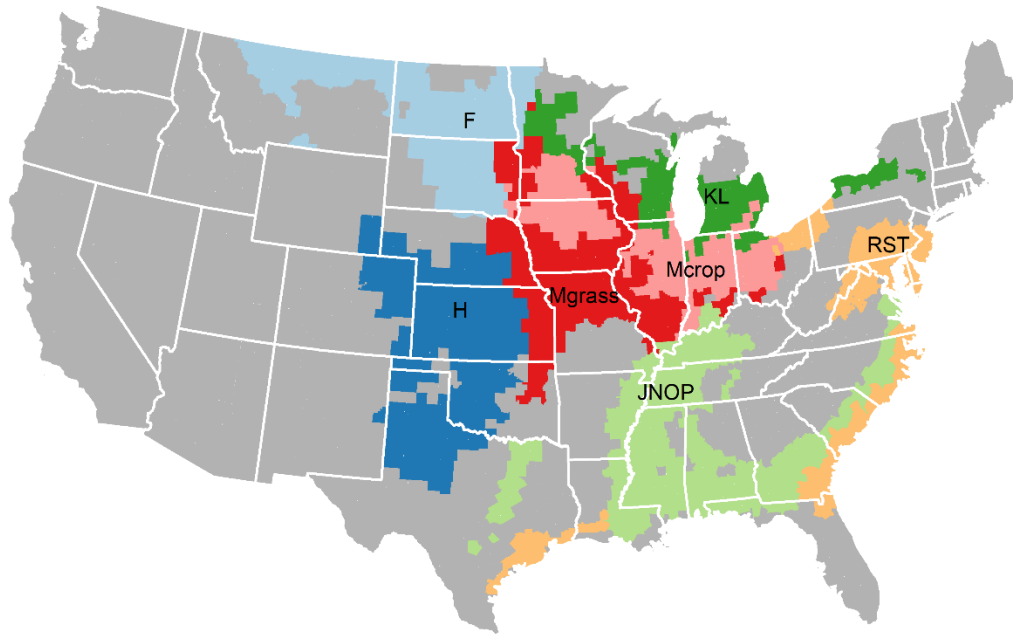

1419

1420 **Fig. S11. Map of regions used in the econometric analysis of cropland transitions.**

1421 Separate models were estimated for each region, with the region label indicating the letter of the  
 1422 Land Resource Region (LRR). Multiple letters indicate that LRRs were combined. LRR M had  
 1423 many more NRI points than other LRRs and included some areas that were very densely cropped  
 1424 and other areas that had substantial portions of grassland. Therefore, we divided this LRR based  
 1425 on whether the Major Land Resource Area (a subregion within an LRR) had grassland area less  
 1426 than (pink) or greater than (bright red) 15% of the area of cropland.

1427

1428

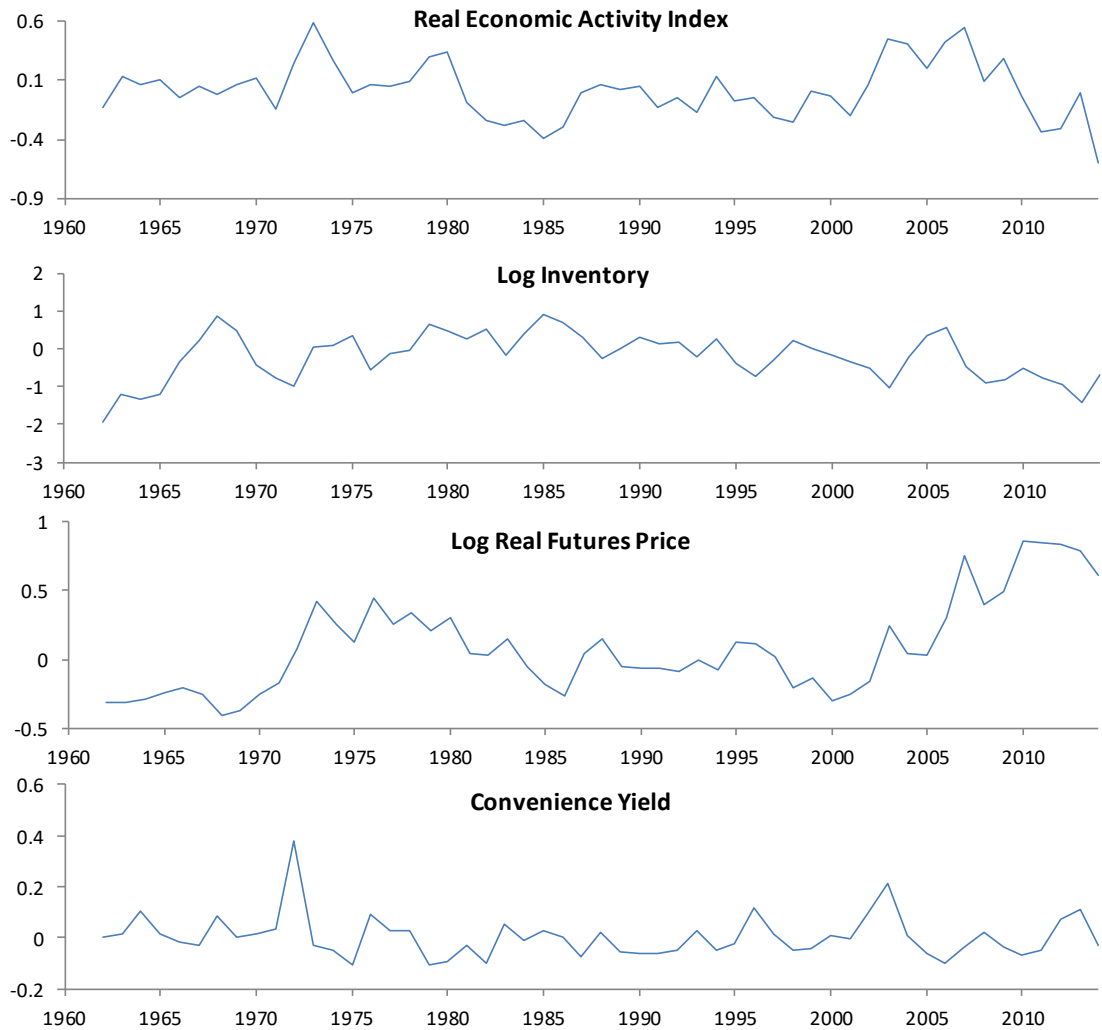

1429  
 1430  
 1431  
 1432  
 1433  
 1434

**Fig. S12. Detrended data for key variables in soybean model.** For clarity, this figure shows linearly detrended series, where we estimate the trend in the pre-RFS period (1961-2005). For the VAR estimation, we use the actual series and include a constant and linear trend in each equation of the model.

1435

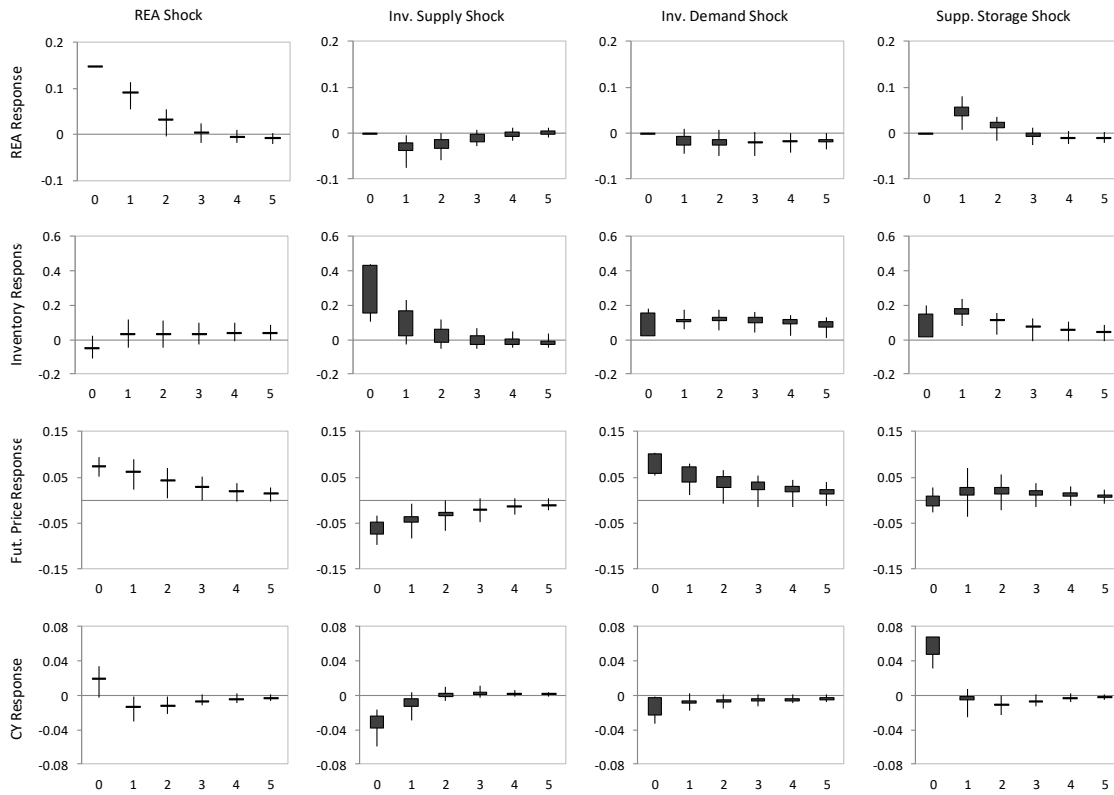

1436  
1437  
1438  
1439  
1440  
1441  
1442  
1443

**Fig. S13. Impulse response functions for soybeans.** Responses to one-time one standard deviation shocks for the two-lag model. The dark boxes indicate the range of impulse responses in the identified set. The vertical bars indicate estimated confidence intervals that cover the true parameter with probability greater than 0.90. We obtain these intervals using a recursive-design wild bootstrap following the approach of Carter *et al.* (1).

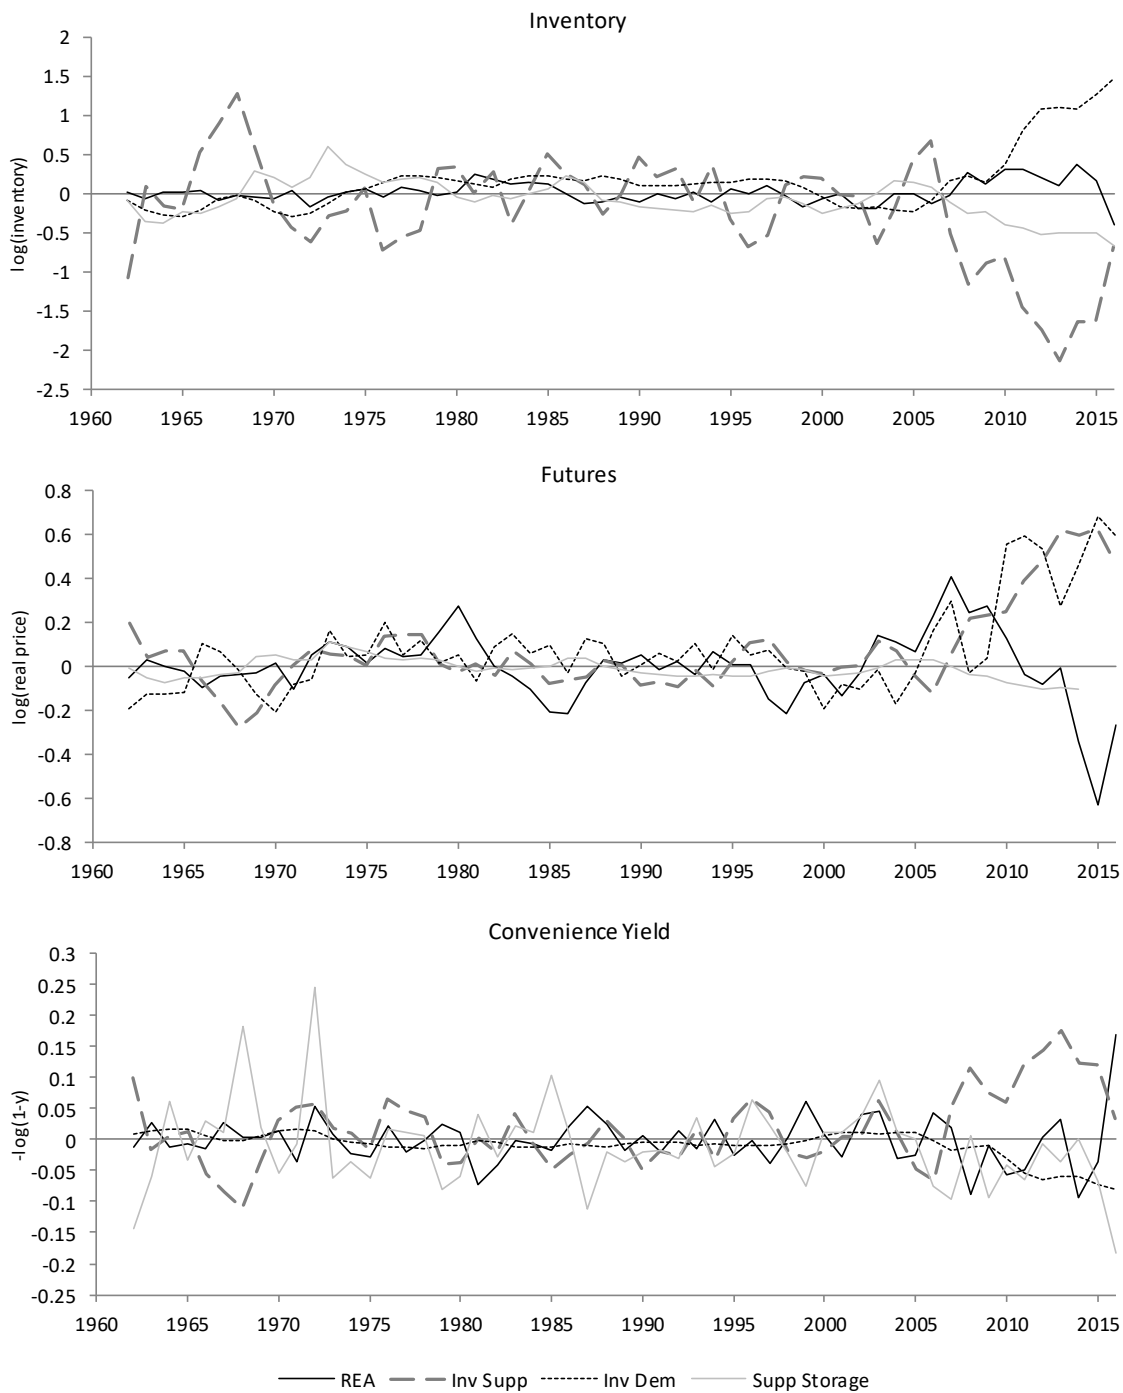

1444  
 1445  
 1446  
 1447  
 1448

**Fig. S14. Historical decomposition for soybeans.** Figures show contributions of each shock to the relevant series for the one-lag model. The sum of the contributions equals the observed data (net of trend).



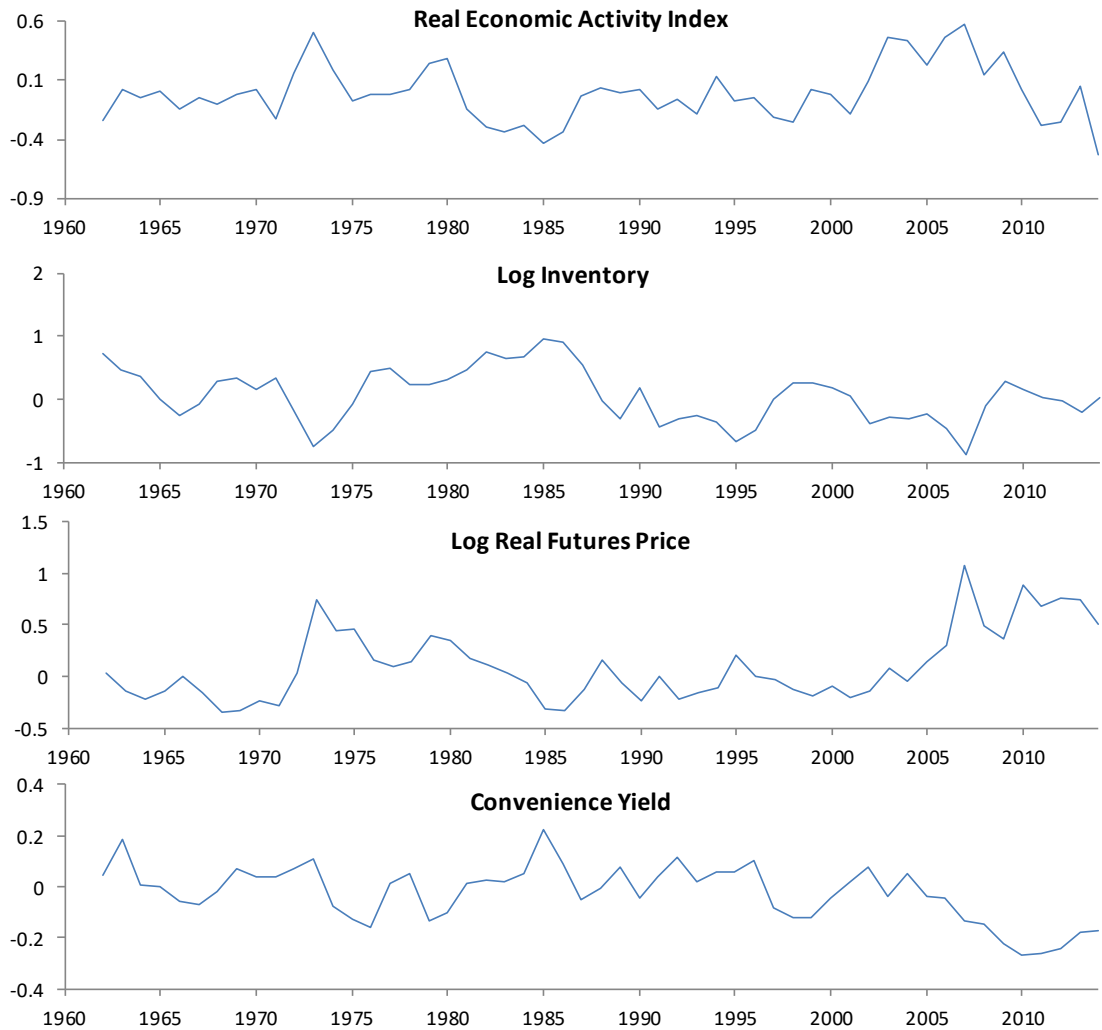

1449  
 1450  
 1451  
 1452  
 1453  
 1454

**Fig. S15. Detrended data for key variables in wheat model.** For clarity, this figure shows linearly detrended series, where we estimate the trend in the pre-RFS period (1961-2005). For the VAR estimation, we use the actual series and include a constant and linear trend in each equation of the model.

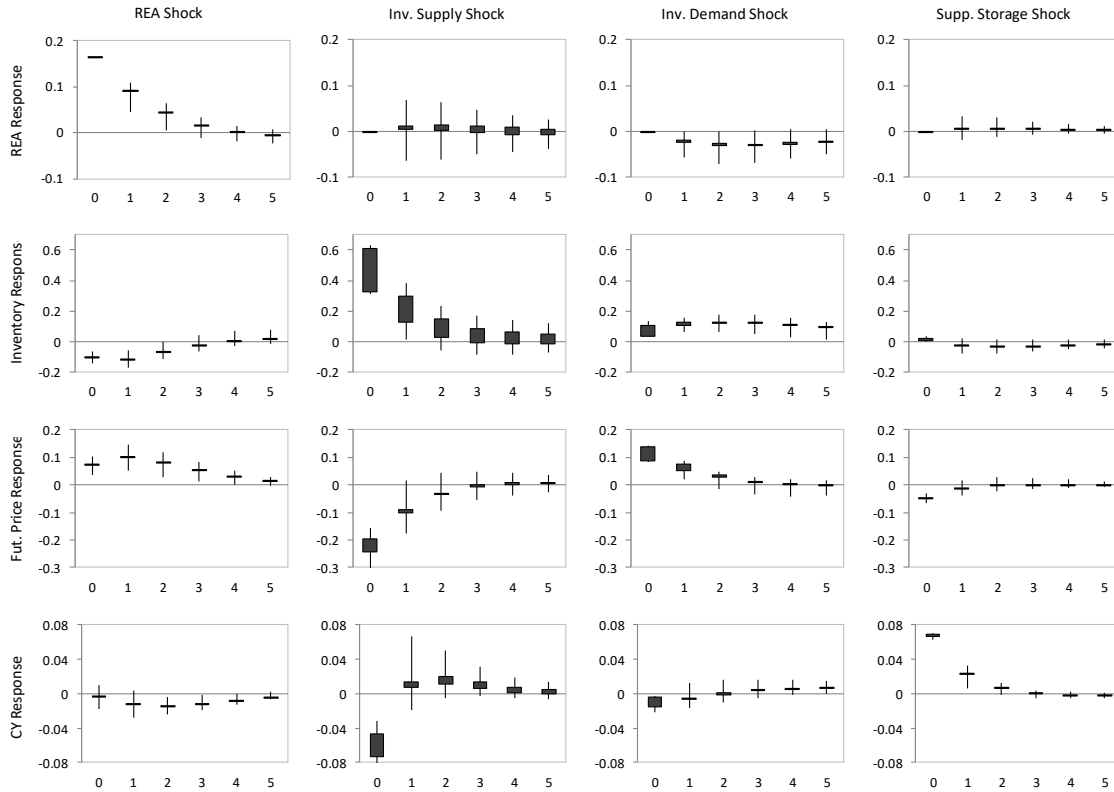

1455  
 1456  
 1457  
 1458  
 1459  
 1460  
 1461  
 1462

**Fig. S16. Impulse response functions for wheat.** Responses to one-time one standard deviation shocks for the two-lag model. The dark boxes indicate the range of impulse responses in the identified set. The vertical bars indicate estimated confidence intervals that cover the true parameter with probability greater than 0.90. We obtain these intervals using a recursive-design wild bootstrap following the approach of Carter *et al.* (1).

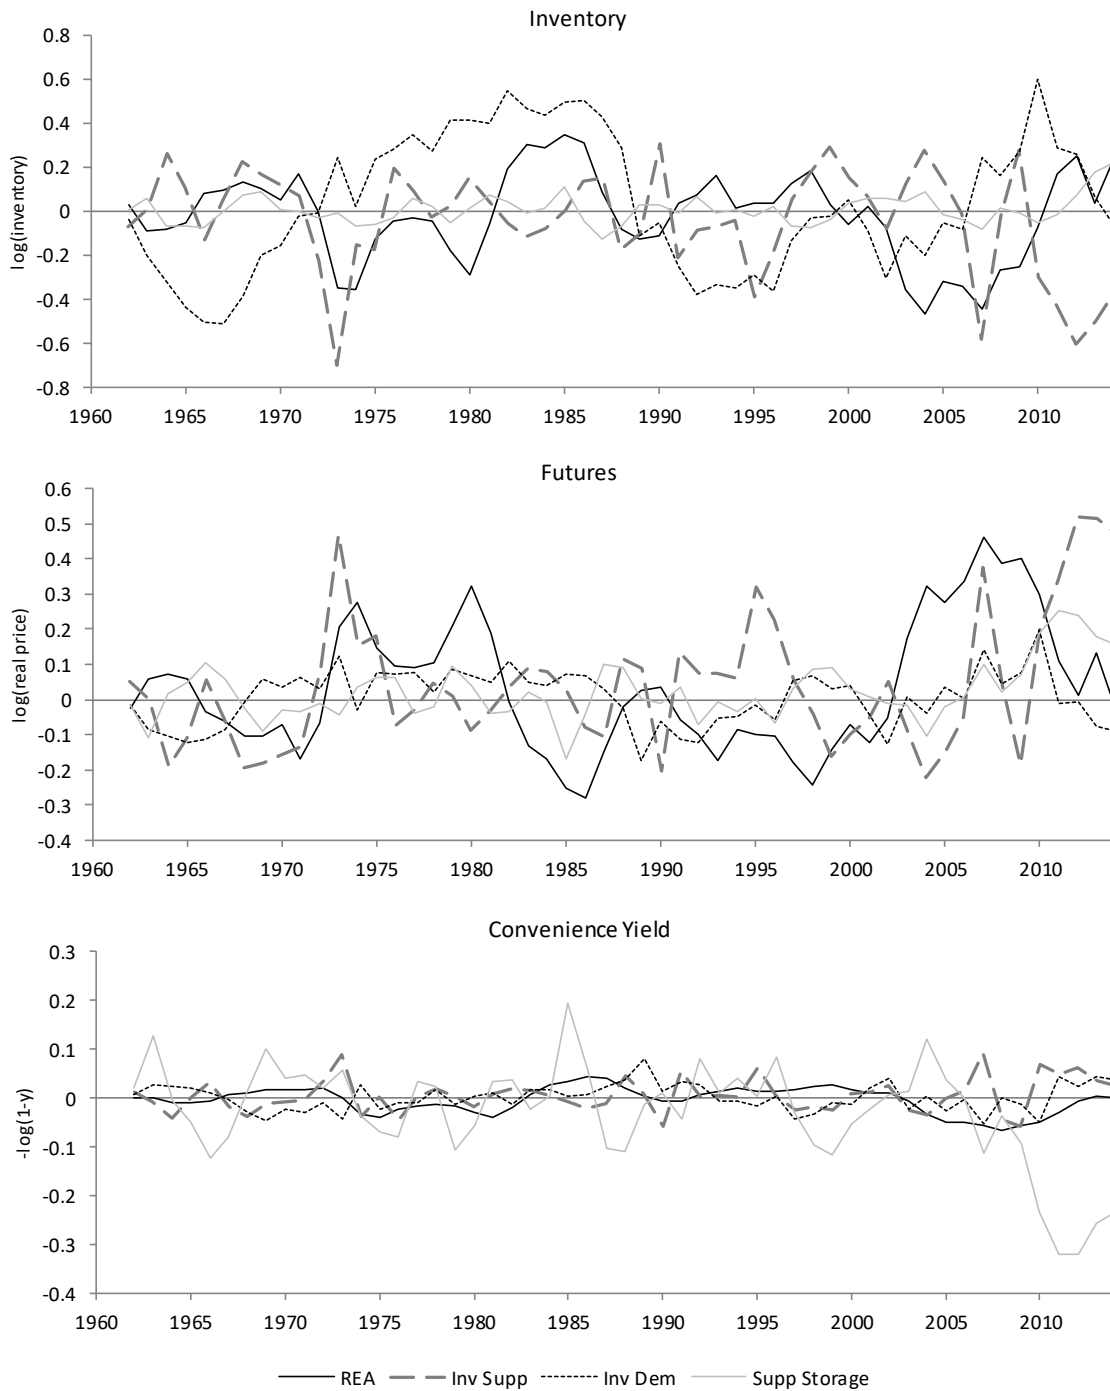

1463  
 1464  
 1465  
 1466  
 1467

**Fig. S17. Historical decomposition for wheat.** Figures show contributions of each shock to the relevant series for the one-lag model. The sum of the contributions equals the observed data (net of trend).

1468

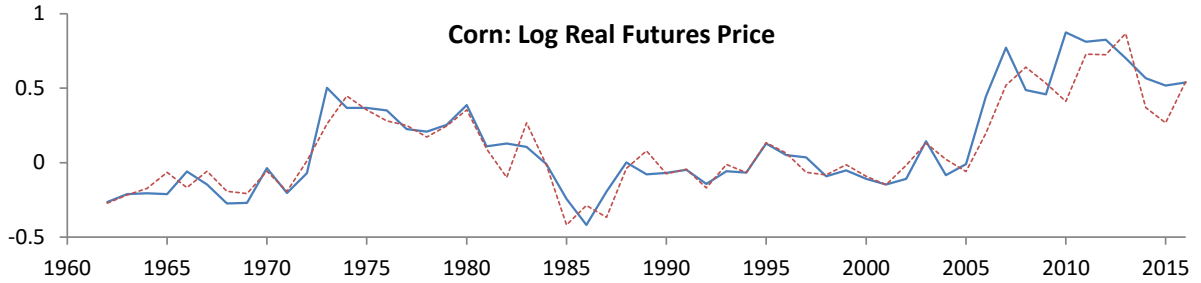

1469

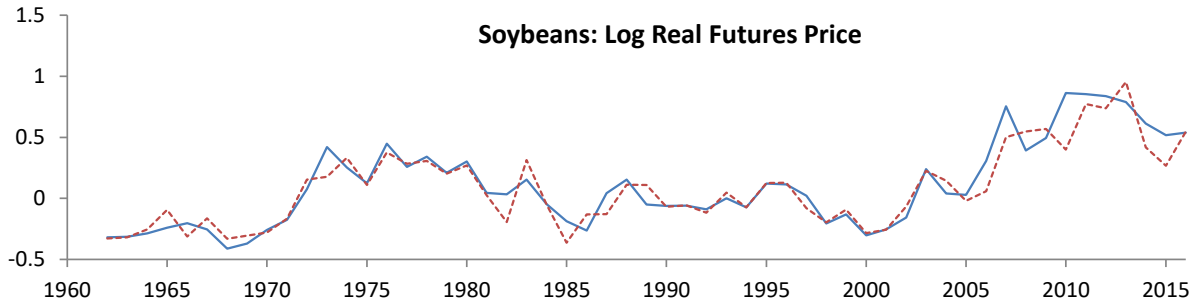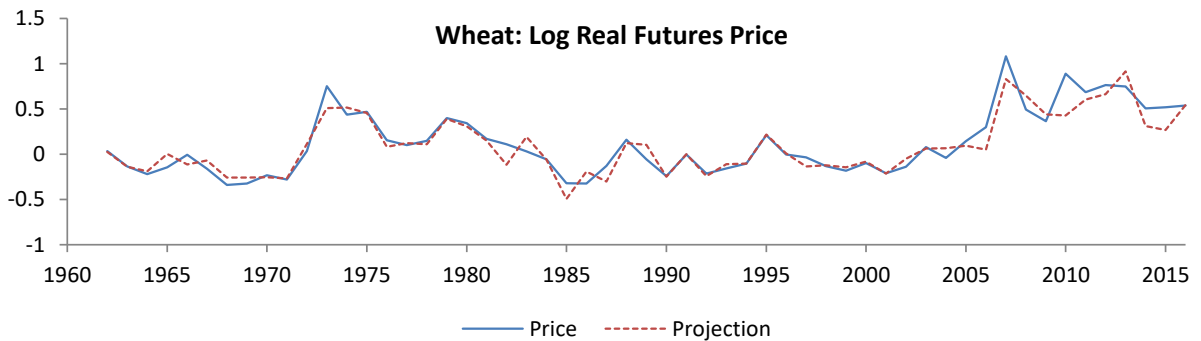

1470

1471

1472

1473

1474

1475

**Fig. S18. Predicted crop prices versus observed crop prices over time.** Figure shows detrended market prices, as predicted by the VAR model compared to observed prices. Predictions are of the current-year price given current-year values of the other variables and prior-year values of all the variables.

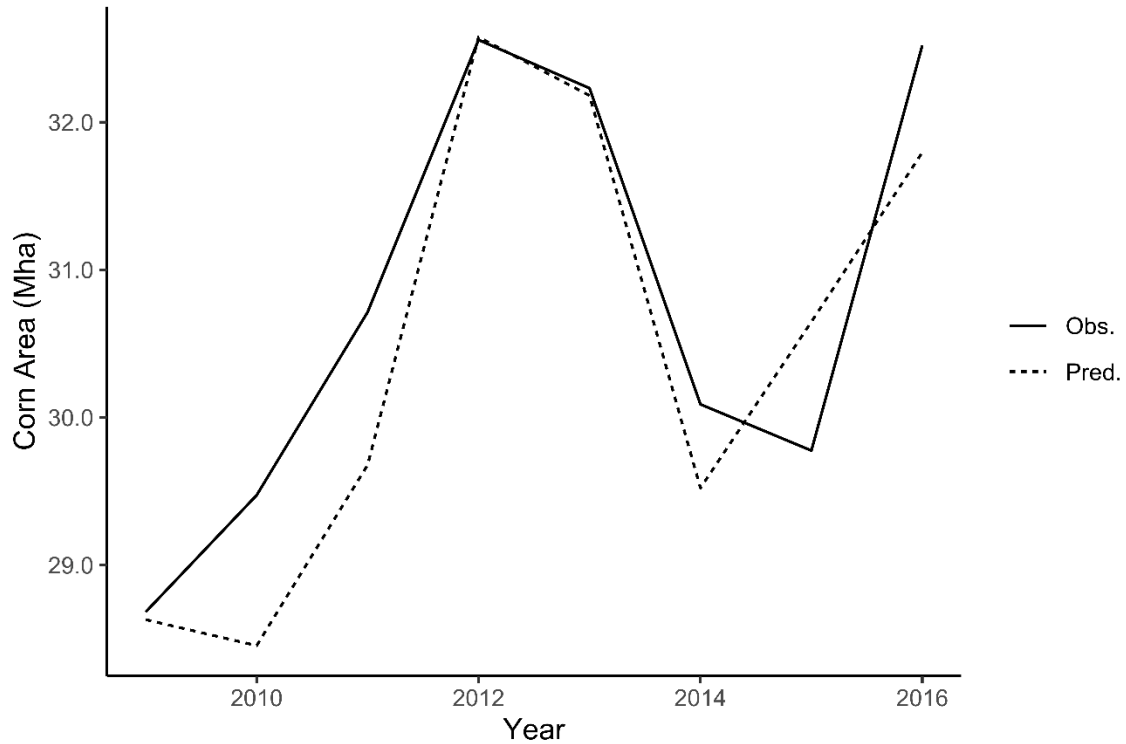

1476  
 1477  
 1478  
 1479  
 1480  
 1481  
 1482  
 1483  
 1484  
 1485

**Fig. S19. Predicted corn area versus observed area over time.** Figure shows the predicted corn area from the crop rotation model (dashed line) compared to the aggregate area from the Cropland Data Layer (solid line) from 2009 to 2016. We begin the graph in 2009 because the Cropland Data Layer was available for the entire nation starting in 2008 and a one-year lag is used in the modeling. The predicted and observed areas only represent the regions used in our econometric model and not the entire nation.

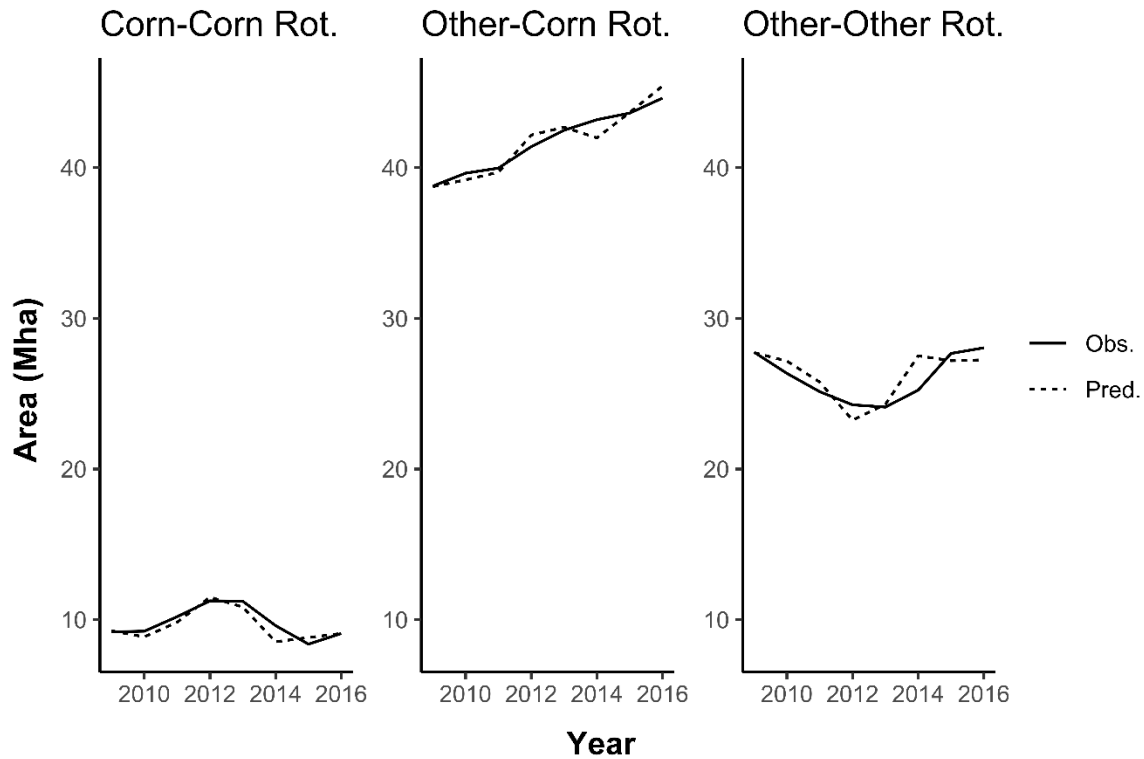

1486  
 1487  
 1488  
 1489  
 1490  
 1491  
 1492  
 1493  
 1494

**Fig. S20. Predicted area of each crop rotation versus observed area over time.** Figure shows the predicted area of each rotation from the econometric model (dashed line) compared to the aggregate area from the Cropland Data Layer (solid line) from 2009 to 2016. We begin the graph in 2009 because the Cropland Data Layer was available for the entire nation starting in 2008 and a one-year lag is used in the modeling. The predicted and observed areas only represent the regions used in our econometric model and not the entire nation.

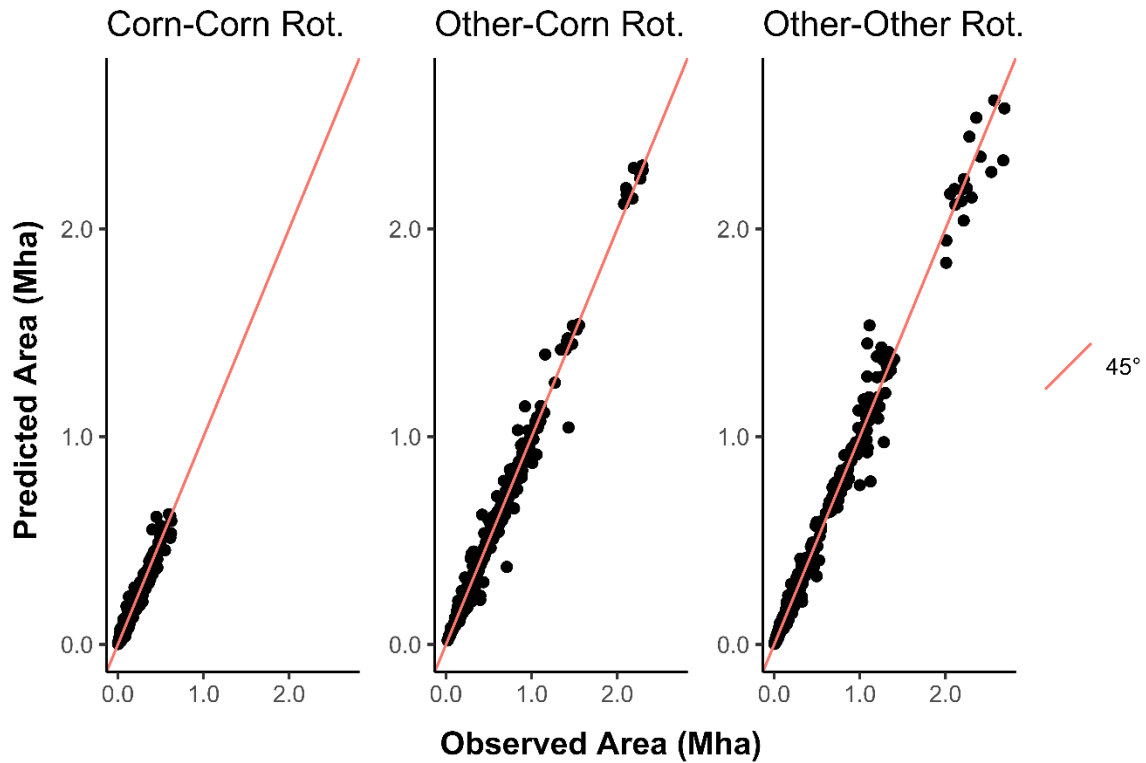

1495  
 1496  
 1497  
 1498  
 1499  
 1500  
 1501  
 1502

**Fig. S21. Predicted area of each crop rotation versus observed area across Major Land Resource Areas.** The points in the figure show the predicted area of each rotation from the econometric model and the area from the Cropland Data Layer for each Major Land Resource Area (MLRA) in each year. In other words, each dot represents an MLRA-year pair. The red line starts at the origin with a slope of 1 and indicates the line of perfect fit.

# Nitrate leaching

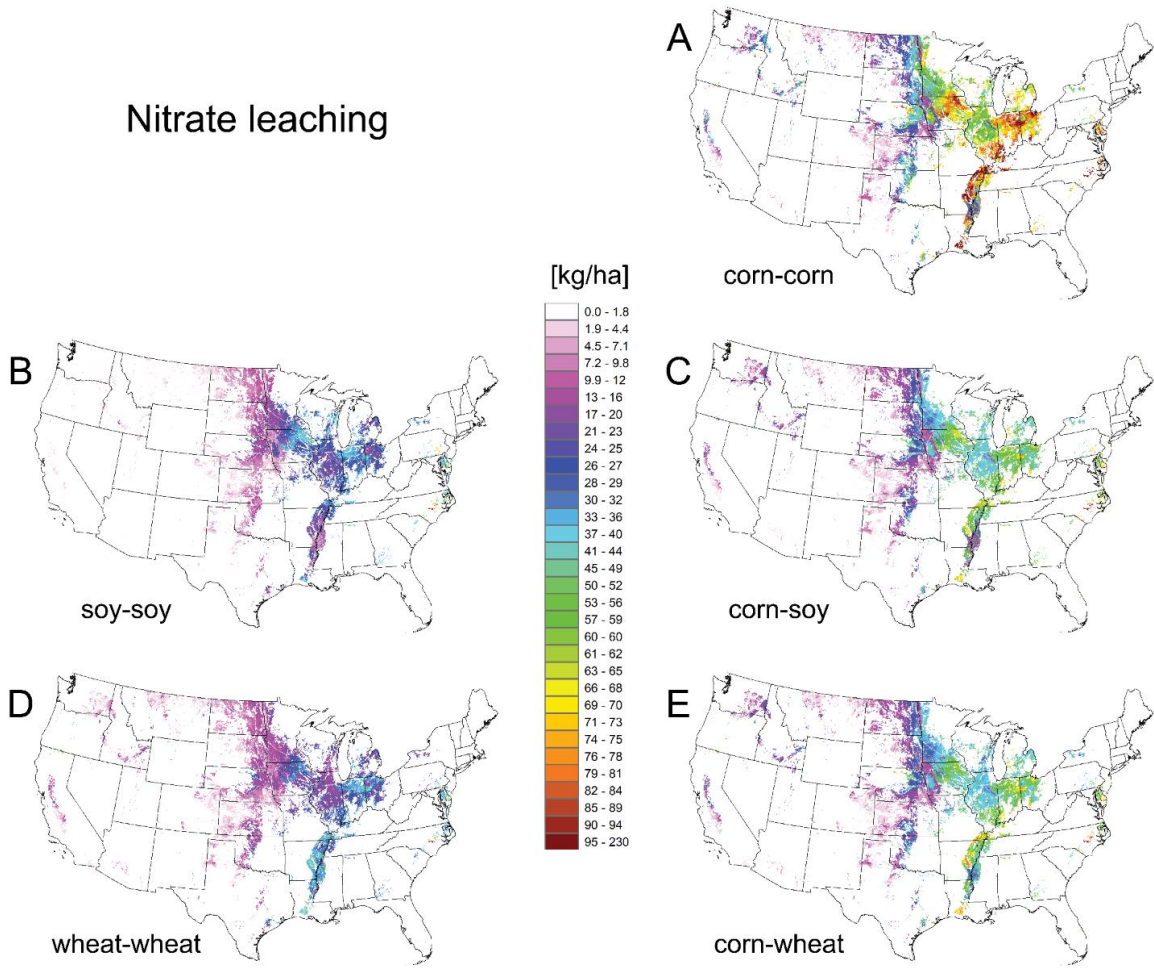

1503  
1504  
1505  
1506  
1507

**Figure S22. Median annual field-level nitrate leaching.** Results shown for the five cropping rotations modeled across all cropland during the 2007-16 time period.



# Soil erosion

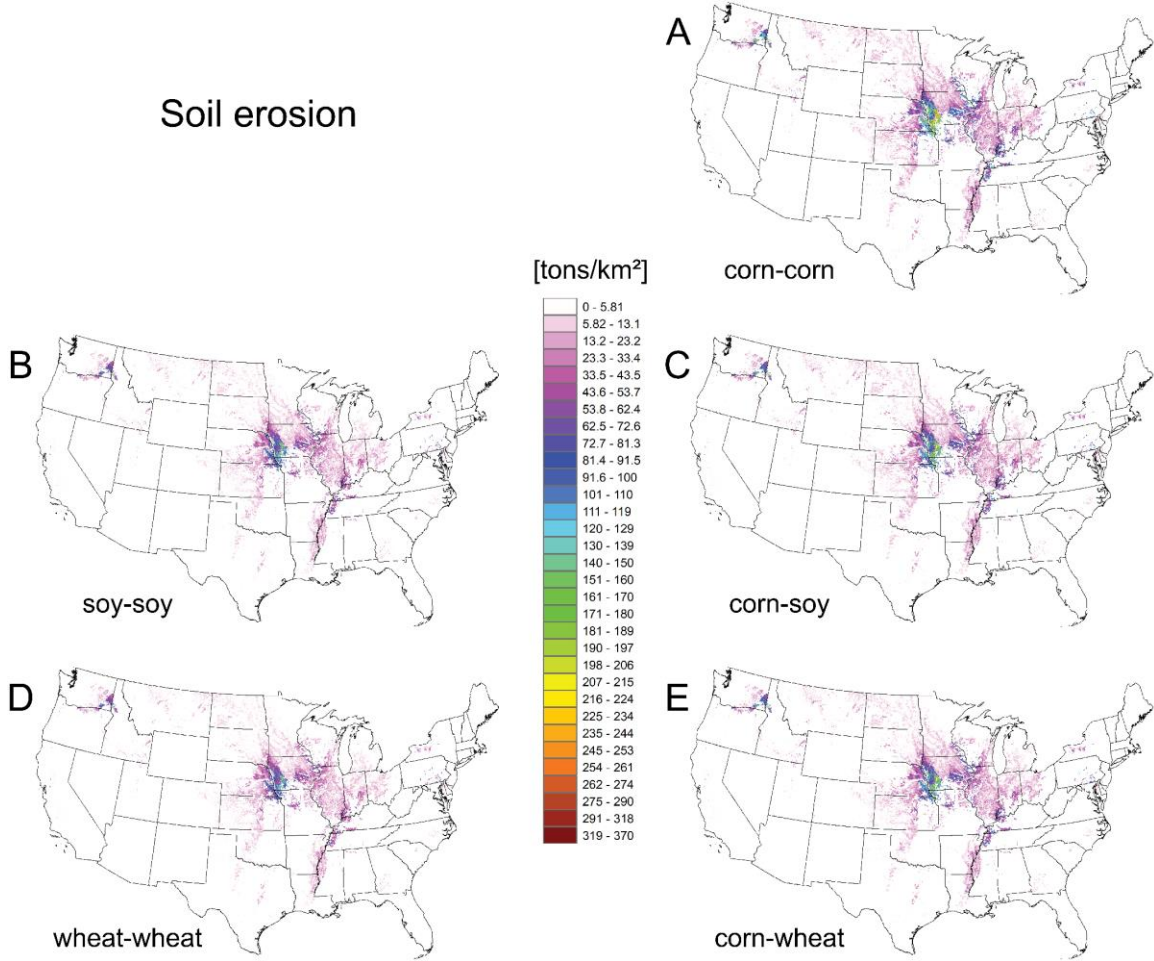

1508  
1509  
1510  
1511  
1512  
1513

**Figure S23. Median annual field-level soil erosion.** Results shown for the five cropping rotations modeled across all cropland during the 2007-16 time period.

# Phosphorus runoff

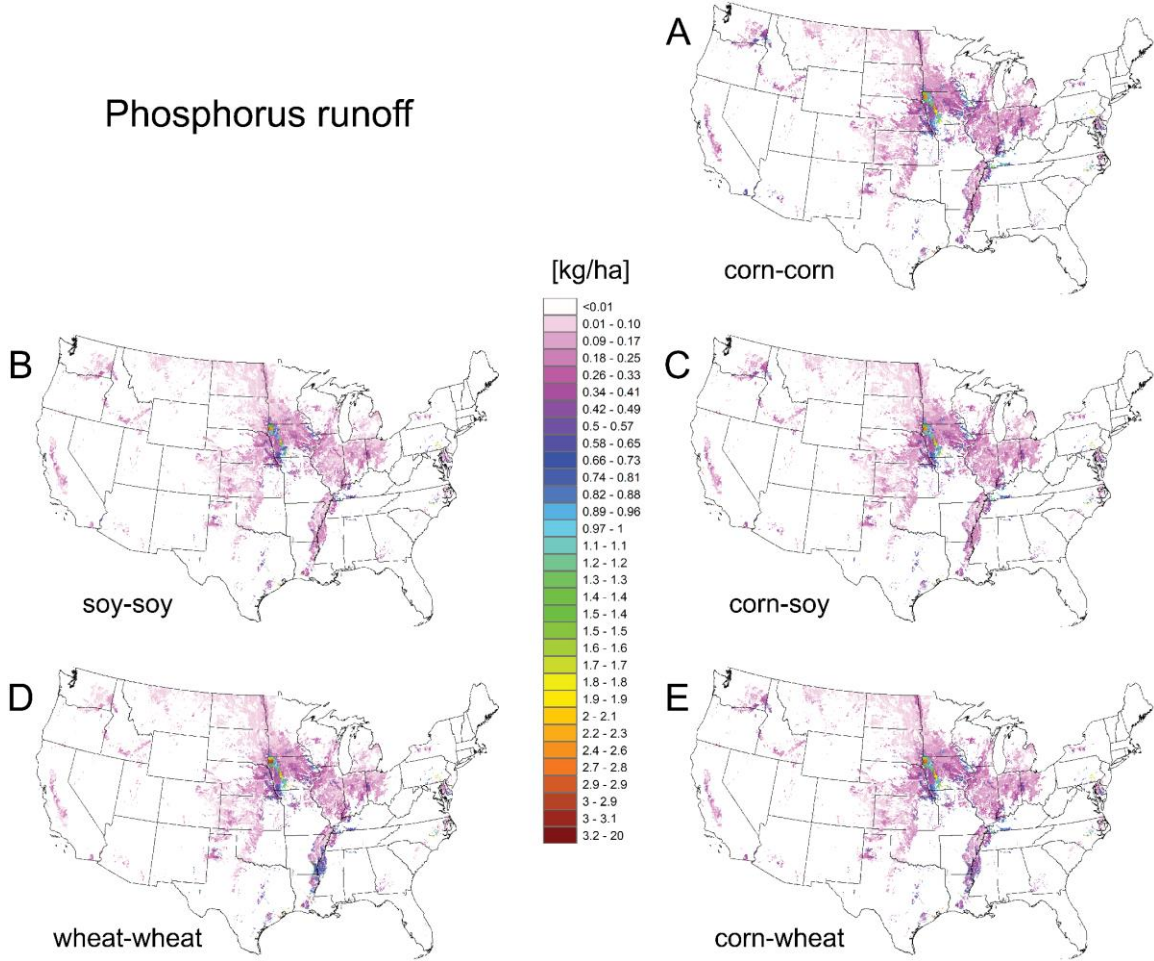

1514  
1515  
1516  
1517  
1518

**Figure S24. Median annual field-level phosphorus runoff.** Results shown for the five cropping rotations modeled across all cropland during the 2007-16 time period.

1519  
1520

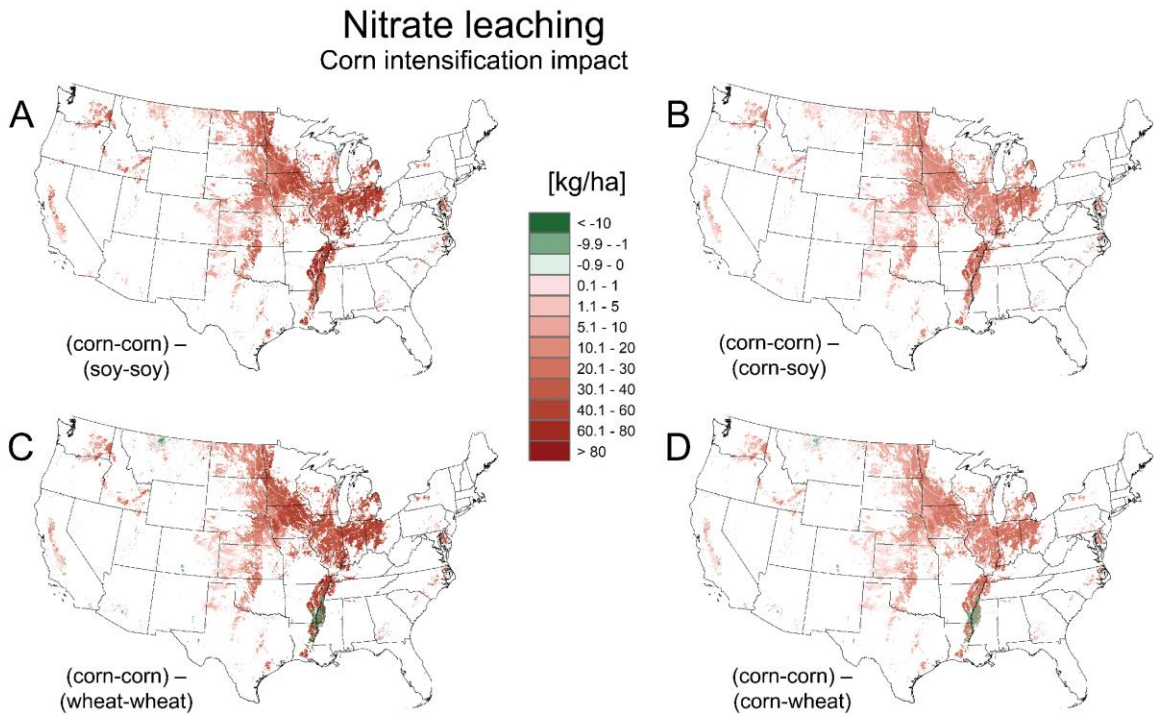

1521  
1522  
1523  
1524  
1525  
1526

**Figure S25. Corn intensification impact.** Difference in median annual (2007-16) nitrate leaching loss between continuous corn and other cropping rotations (green indicates continuous corn has less impact; red indicates continuous corn has more impact).

## Phosphorus runoff Corn intensification impact

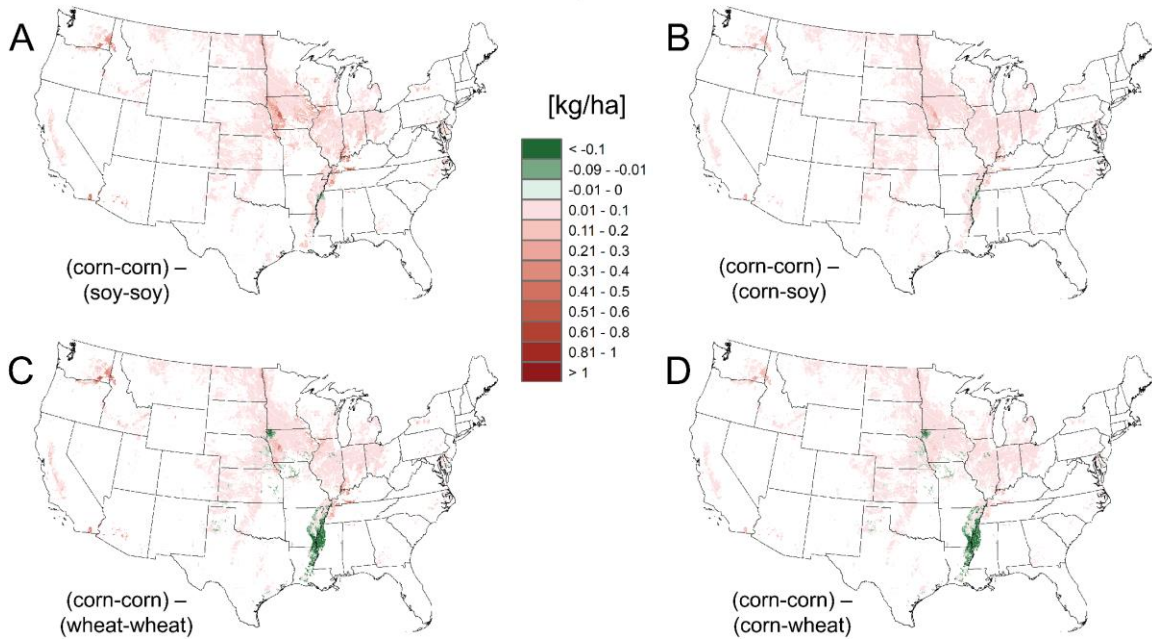

1527  
1528  
1529  
1530  
1531  
1532

**Figure S26. Corn intensification impact.** Difference in median annual (2007-16) phosphorus runoff loss between continuous corn and other cropping rotations (green indicates continuous corn has less impact; red indicates continuous corn has more impact).

## Soil erosion Corn intensification impact

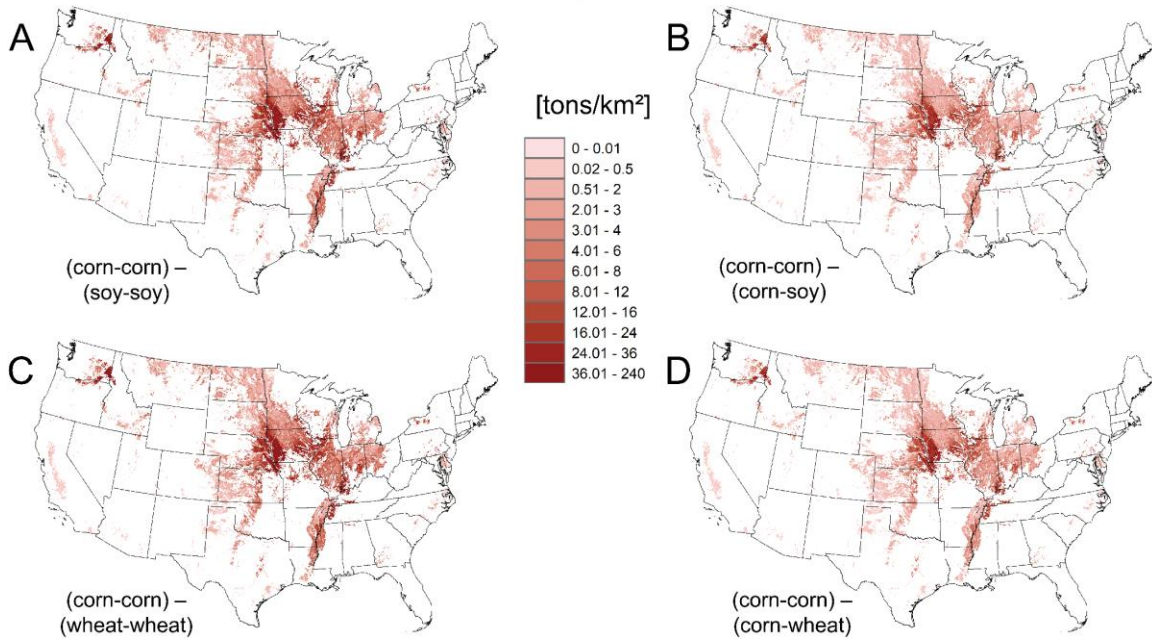

1533  
1534  
1535  
1536  
1537  
1538  
1539

**Figure S27. Corn intensification impact.** Difference in median annual (2007-16) soil erosion loss between continuous corn and other cropping rotations (green indicates continuous corn has less impact; red indicates continuous corn has more impact)



# Nitrogen inputs

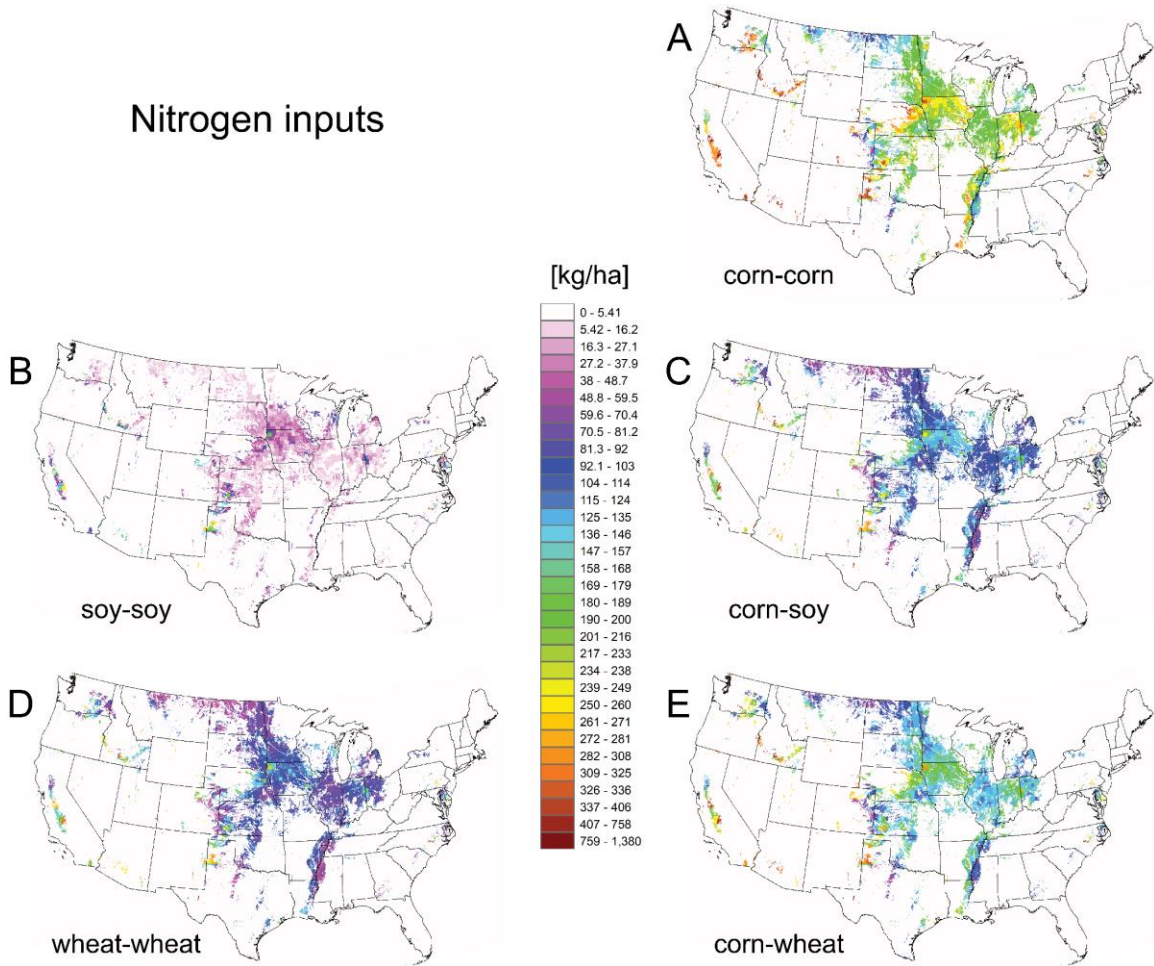

1540  
1541  
1542  
1543  
1544

**Figure S28. Total nitrogen inputs for scenarios.** Mean total (fertilizer and manure) nitrogen inputs over the 2007-16 period for each of the five cropping rotations modeled.

# Phosphorus inputs

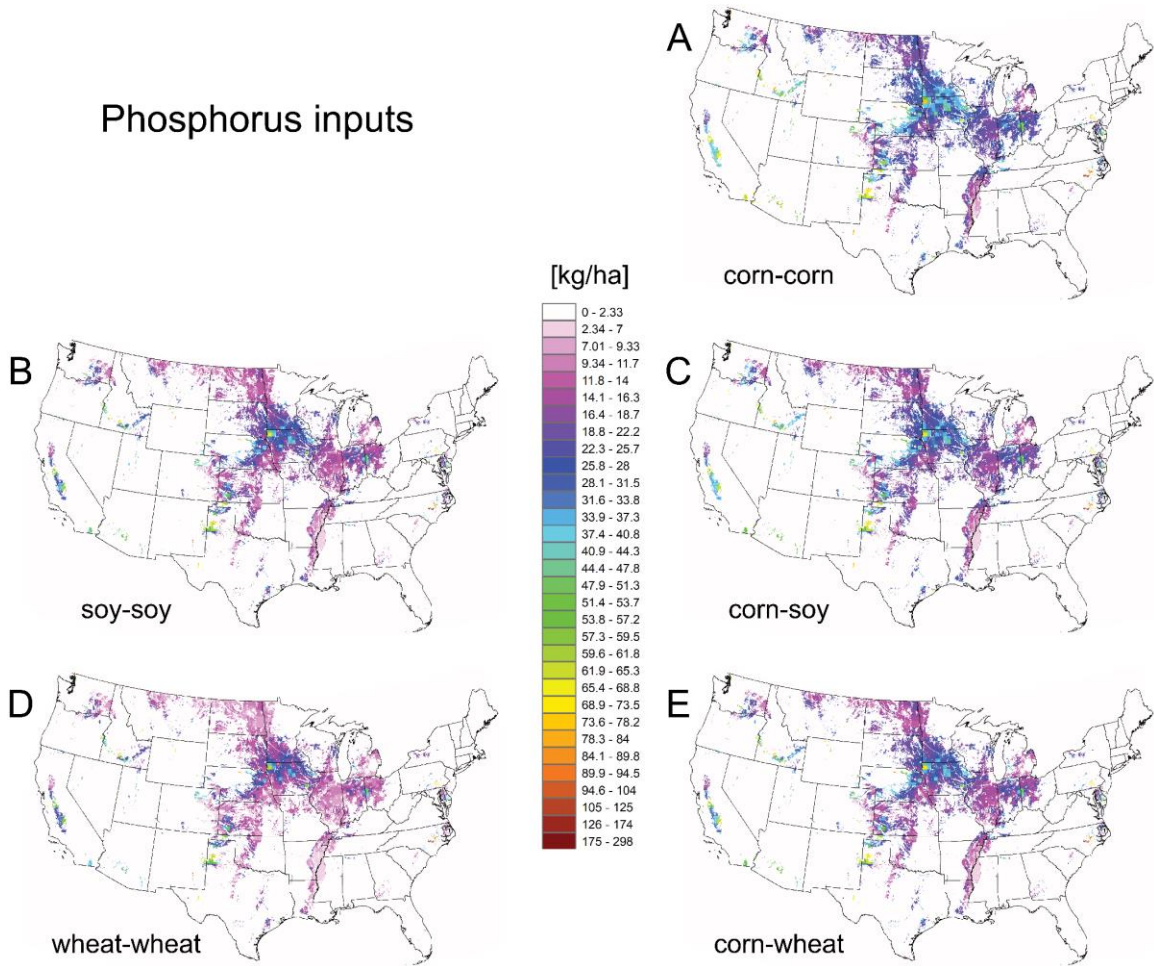

1545  
1546  
1547  
1548  
1549

**Figure S29. Total phosphorus inputs for scenarios.** Mean total (fertilizer and manure) phosphorus inputs over the 2007-16 period for each of the five cropping rotations modeled.

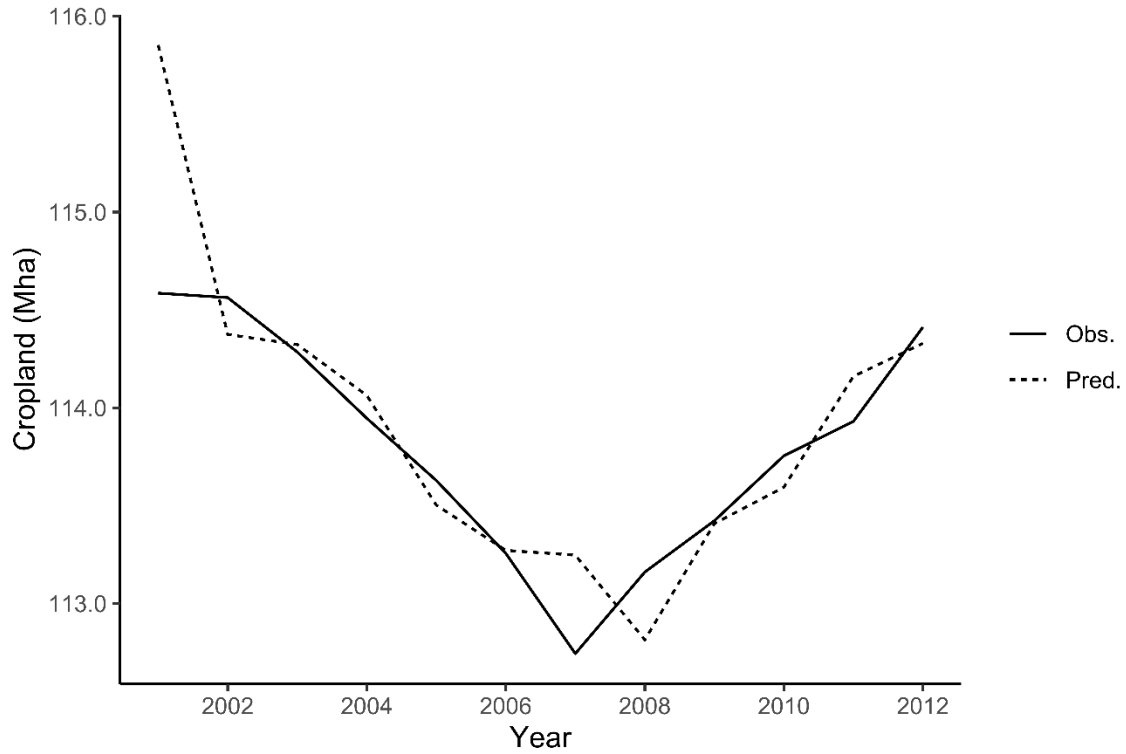

1550  
 1551  
 1552  
 1553  
 1554  
 1555  
 1556  
 1557  
 1558  
 1559

**Fig. S30. Predicted area of cropland versus observed area over time.** Figure shows the predicted area of cropland from the econometric model for cropland transitions (dashed line) compared to the aggregate area from the National Resources Inventory (solid line) from 2001 to 2012. We begin the graph in 2001 because a one-year lag is used in the modeling. The predicted and observed areas only represent the regions used in our econometric model and not the entire nation.



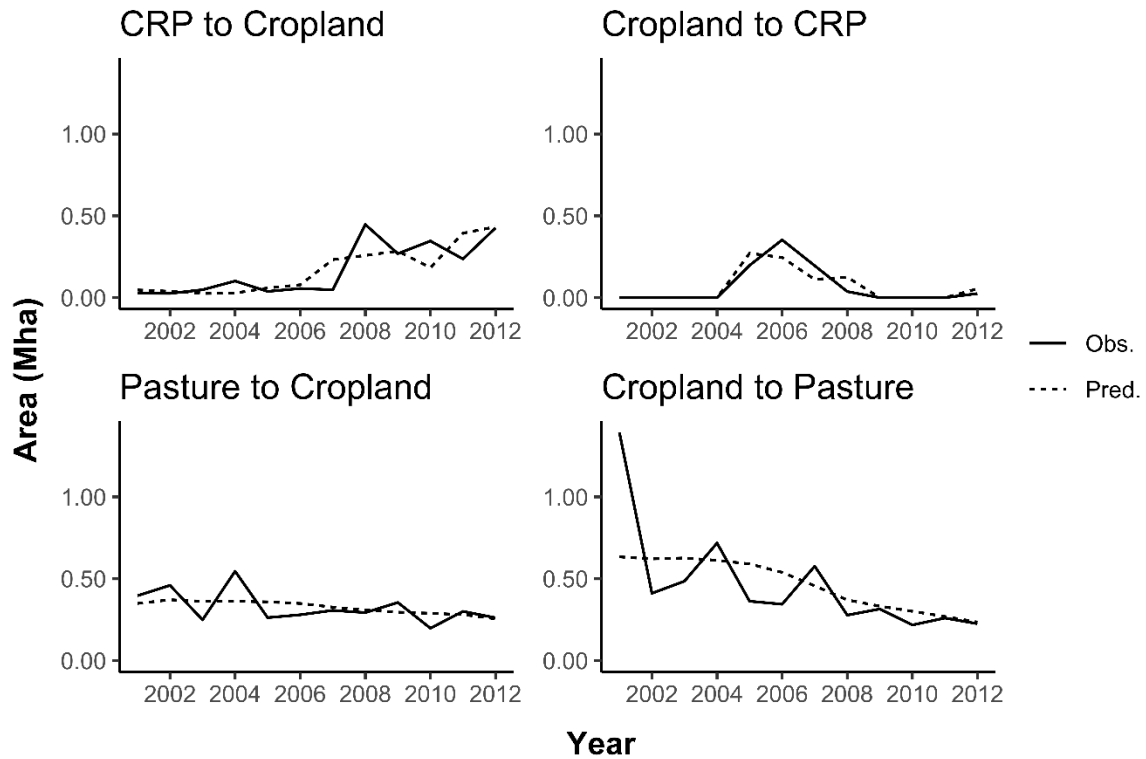

1560  
 1561  
 1562  
 1563  
 1564  
 1565  
 1566  
 1567  
 1568

**Fig. S31. Predicted area of each cropland transition versus observed area over time.** Figure shows the predicted area of each cropland transition from the econometric model (dashed line) compared to the aggregate area from the National Resources Inventory (solid line) from 2001 to 2012. We begin the graph in 2001 because a one-year lag is used in the modeling. The predicted and observed areas only represent the regions used in our econometric model and not the entire nation.

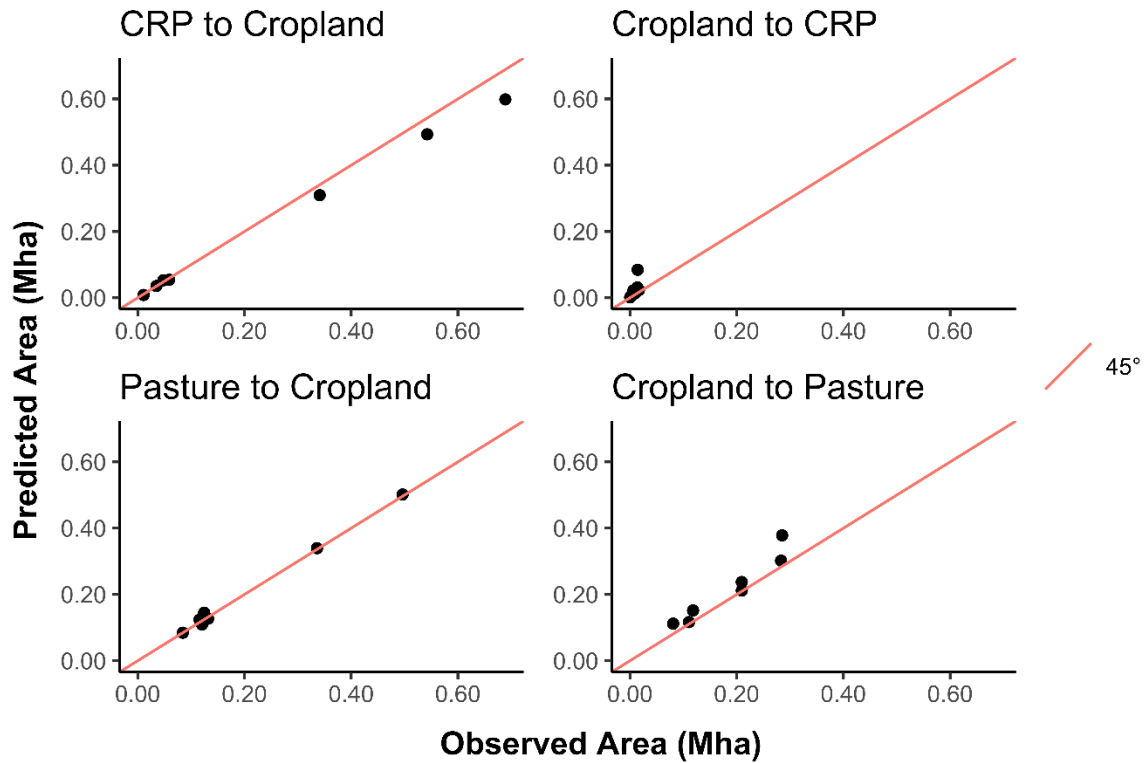

1569  
 1570  
 1571  
 1572  
 1573  
 1574  
 1575  
 1576

**Fig. S32. Predicted area of each cropland transition versus observed area across Land Resource Regions.** The points in the figure show the predicted area of each transition from the econometric model and area from the National Resources Inventory (NRI) for each Land Resource Region group modeled. Areas are averaged for transitions between 2007 and 2012. The red line starts at the origin with a slope of 1 and indicates the line of perfect fit.

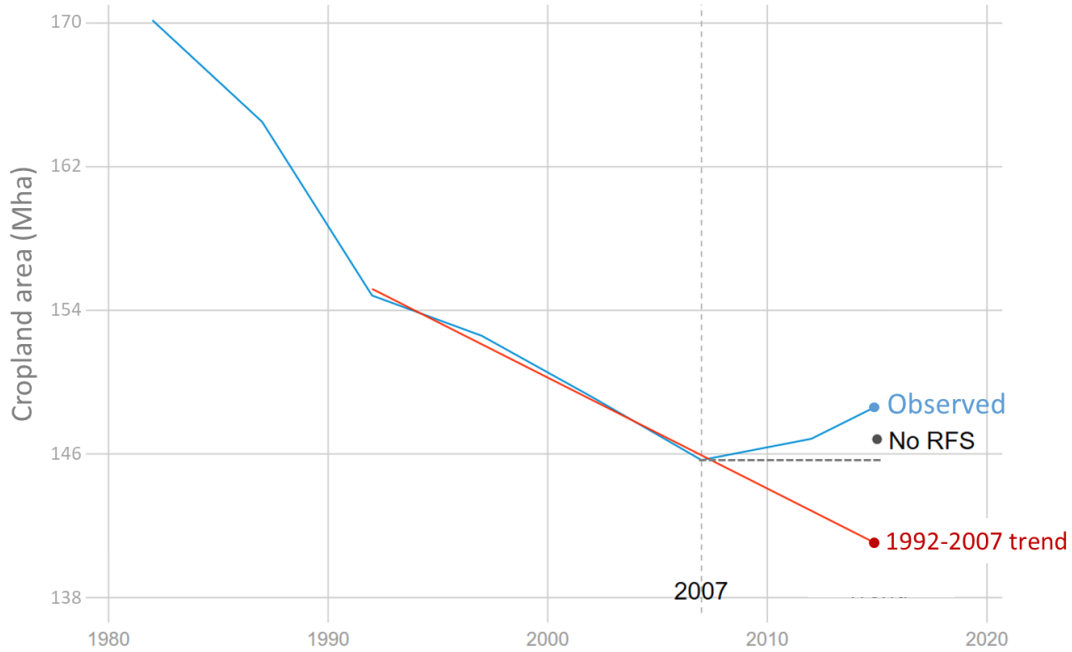

1577  
 1578  
 1579  
 1580  
 1581  
 1582  
 1583

**Figure S33. National cropland area over time.** The blue line shows total observed cropland area according to the NRI data. The red line represents an extension of the 1992-2007 NRI trend. Point estimate of “No RFS” reflects the actual NRI data minus our estimated impact of the RFS.

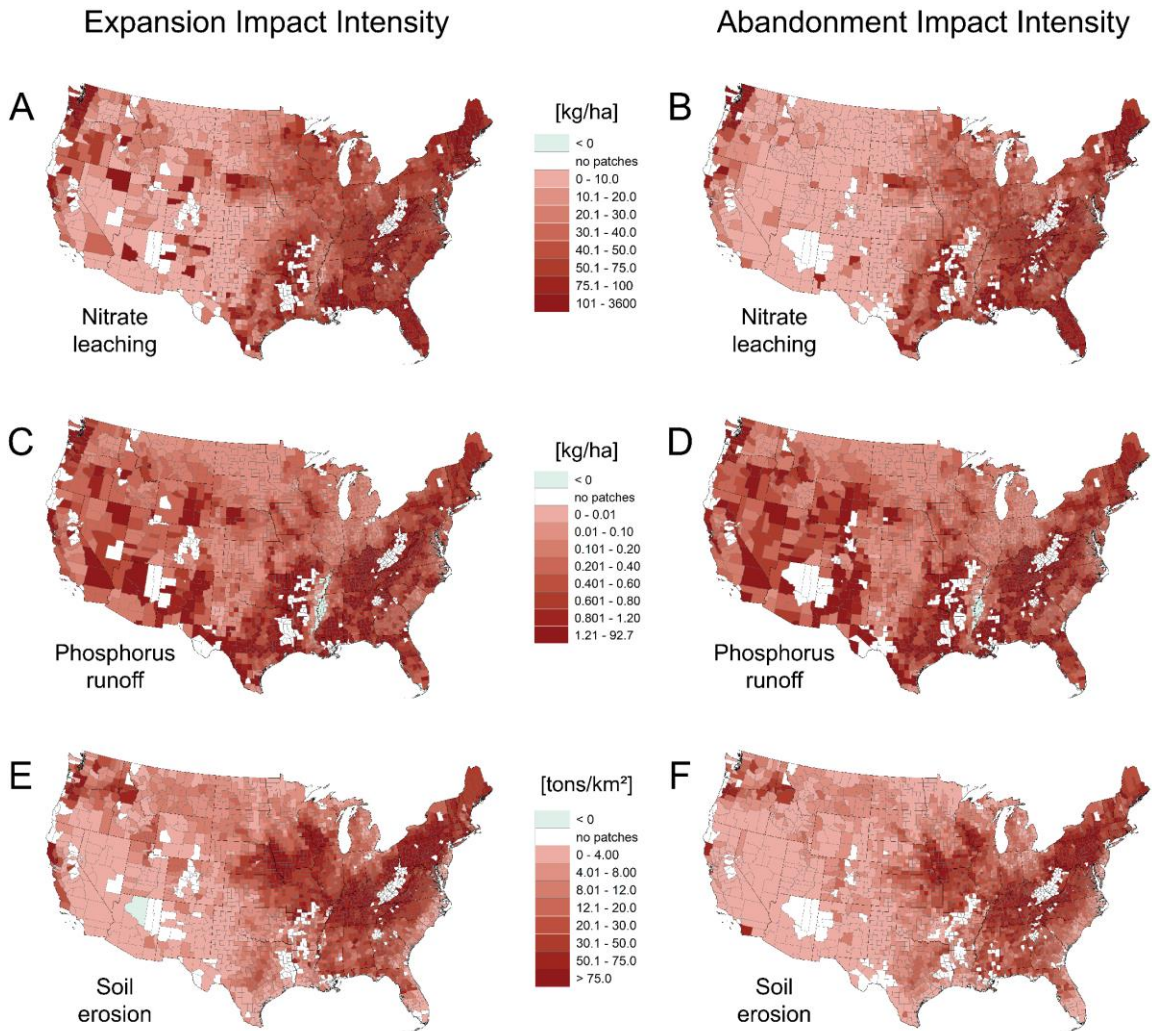

1584  
 1585  
 1586  
 1587  
 1588  
 1589  
 1590

**Figure S34. County-averaged impact intensity for nitrate leaching, phosphorus runoff, and soil erosion.** Results separated into land use patches that underwent cropland expansion (left column) and abandonment (right column). The impact intensities for all maps (A-F) represent the differences in values for cropland minus noncropland.

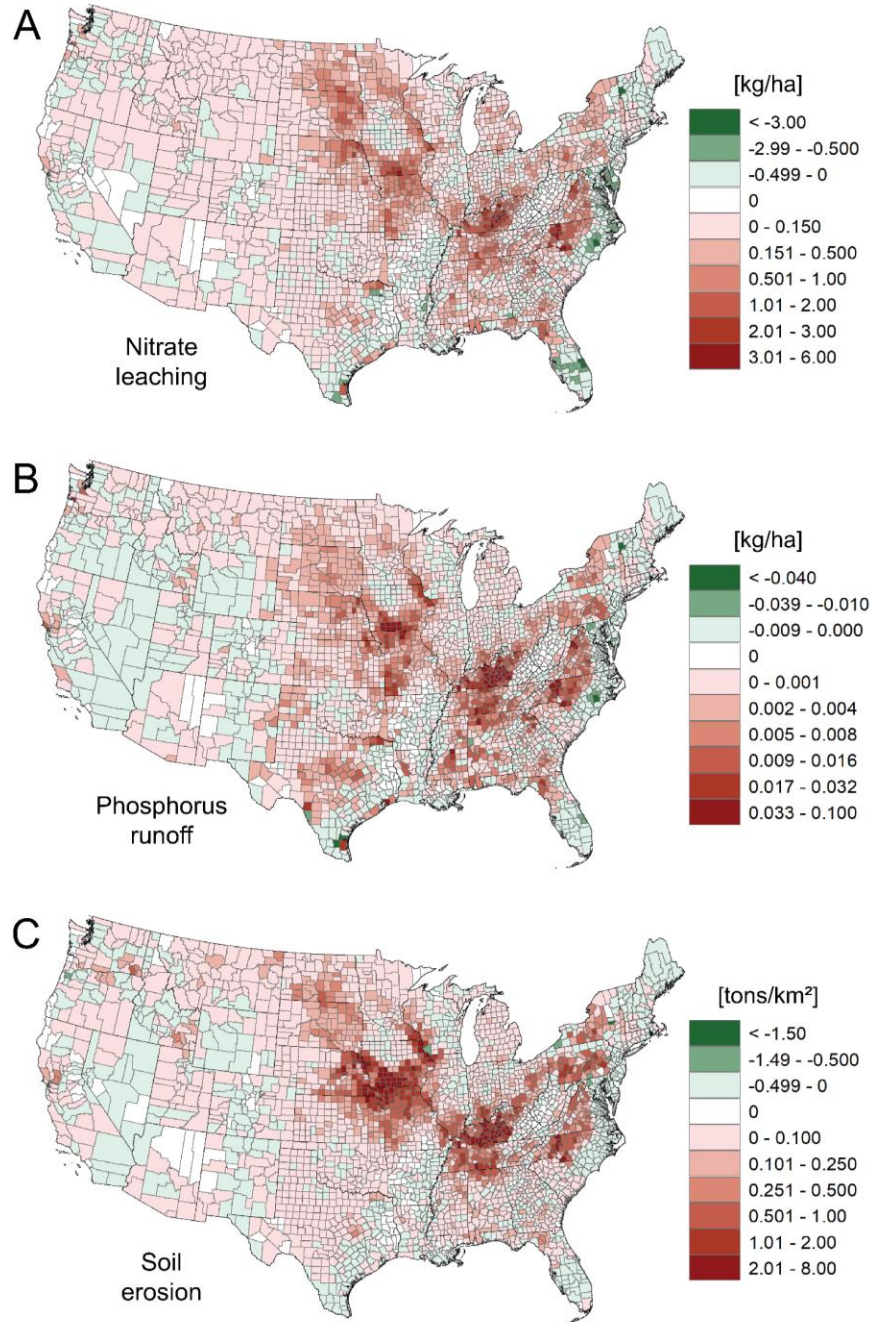

1591  
 1592  
 1593  
 1594  
 1595  
 1596  
 1597  
 1598  
 1599  
 1600

**Figure S35. Net impacts for nitrate leaching, phosphorus runoff, and soil erosion for all cropland expansion and abandonment, 2008-16.** Net impacts reflect the total impacts (intensity x area of conversion) from cropland expansion minus those from abandonment within each county. Net impact values are divided by total county area for normalization and visualization. Note that for this figure only, results reflect impacts from all recent land conversion, not only the subset due to the RFS, and are included to document the underlying trends and data used to estimate RFS-specific water quality impacts.

1601 **Tables S1-S23.**  
 1602

|                                                     | Corn |      | Soybeans |       | Wheat |      |
|-----------------------------------------------------|------|------|----------|-------|-------|------|
| <i>Dollars per bushel</i>                           |      |      |          |       |       |      |
| 2001-05                                             | 2.15 |      | 5.96     |       | 4.03  |      |
| 2006-10                                             |      |      |          |       |       |      |
| Observed                                            | 3.81 |      | 9.67     |       | 6.52  |      |
| BAU                                                 | 2.90 |      | 8.11     |       | 5.45  |      |
| (95% CI for BAU)                                    | 2.24 | 3.65 | 5.61     | 10.56 | 4.07  | 6.39 |
| <br><i>2006-10 percent increase relative to ...</i> |      |      |          |       |       |      |
| ... 2001-05                                         | 77%  |      | 62%      |       | 62%   |      |
| ... BAU                                             | 31%  |      | 19%      |       | 20%   |      |
| (95% CI for BAU)                                    | 70%  | 5%   | 72%      | -8%   | 60%   | 2%   |

1603  
 1604 **Table S1: Observed vs. business-as-usual (BAU) spot prices.** The BAU prices are produced  
 1605 from the model in Carter *et al.* (1) using data updated through the 2016-17 crop year. The model  
 1606 projects the natural log of prices. To obtain the BAU value, we took the average projected  
 1607 difference between the observed and BAU log prices during 2006-10. These differences were  
 1608 0.27 for corn, 0.18 for soybeans, and 0.20 for wheat, which correspond to 31%, 19%, and 20%  
 1609 respective differences and imply that the observed prices were 31%, 19%, and 20% above the  
 1610 BAU for the three commodities. The point estimates come from the point identified parameters in  
 1611 the model and the confidence intervals are generated from the identified set (see **Tables S10-**  
 1612 **S13**).

|             | <u>NRI total cropland <math>\Delta</math></u> |                      | <u>Due to RFS (this study)</u> |                      | <u>RFS contribution</u> |                        |
|-------------|-----------------------------------------------|----------------------|--------------------------------|----------------------|-------------------------|------------------------|
|             | 2007-15<br>(Mha)                              | Annual<br>Ave. (Mha) | 2008-16<br>(Mha)               | Annual<br>Ave. (Mha) | % of<br>NRI             | % $\Delta$ from<br>BAU |
| Expansion   | 8.68                                          | 1.09                 | 1.80                           | 0.22                 | 20.7%                   | 26.1%                  |
| Abandonment | 5.64                                          | 0.71                 | -0.35                          | -0.04                | -6.3%                   | -5.9%                  |
| Net         | 3.04                                          | 0.38                 | 2.15                           | 0.27                 | 70.7%                   | 240.9%                 |

1613 **Table S2. Relative contribution of the RFS to cropland expansion and abandonment.**  
1614 Percent contributions of the RFS calculated from mean annual changes to account for different  
1615 endpoints between this study and the NRI dataset used for comparison.

| Emissions                     | Total                | Annualized                | GHG Intensity           |                          |                              |
|-------------------------------|----------------------|---------------------------|-------------------------|--------------------------|------------------------------|
|                               | Gg CO <sub>2</sub> e | Gg CO <sub>2</sub> e / yr | g CO <sub>2</sub> e / L | g CO <sub>2</sub> e / MJ | kg CO <sub>2</sub> e / mmBtu |
| Ecosystem carbon              | 397,659              | 13,255                    | 636.67                  | 29.66                    | 31.29                        |
| -- <i>Cropland expansion</i>  | 320,380              | 10,679                    | 512.94                  | 23.90                    | 25.21                        |
| -- <i>Forgone abandonment</i> | 77,279               | 2,576                     | 123.73                  | 5.76                     | 6.08                         |
| N <sub>2</sub> O              | -                    | 4,052                     | 194.60                  | 9.07                     | 9.57                         |
| -- <i>Crop rotations Δ</i>    | -                    | 2,773                     | 133.20                  | 6.21                     | 6.55                         |
| -- <i>Cropland extent Δ</i>   | -                    | 1,279                     | 61.42                   | 2.86                     | 3.02                         |
| Total domestic LUC            | -                    | 17,307                    | 831.27                  | 38.73                    | 40.86                        |

1616  
1617  
1618  
1619  
1620

**Table S3: Greenhouse gas (GHG) emissions by source.** Annualized ecosystem carbon emissions based on a 30-year amortization period (73). GHG intensities calculated using a 20.82 billion liter modeled change in annual production, an ethanol heating value of 21.46 MJ / L, and a conversion factor of 947.82 MJ / Btu.



|                             |               | Corn                                  | Soybeans                              | Wheat                                                                   |
|-----------------------------|---------------|---------------------------------------|---------------------------------------|-------------------------------------------------------------------------|
| Global Commodity Demand (X) | variable      | Real economic activity index          | Real economic activity index          | Real economic activity index                                            |
|                             | Source timing | Kilian (2009) March                   | Kilian (2009) March                   | Kilian (2009) March                                                     |
| Inventory (I)               | variable      | Total ending stocks (bu)              | Total ending stocks (bu)              | Total ending stocks (bu)                                                |
|                             | source timing | USDA September                        | USDA September                        | USDA June                                                               |
| Futures Price (F)           | variable      | CBOT Dec contract                     | CME Nov contract                      | CBOT Dec contract (1960-1976), KCBOT Dec contract (1977-2017)           |
|                             | source timing | quandl average daily price in March   | quandl average daily price in March   | quandl average daily price in March                                     |
| Spot Price (S)              | variable      | Central IL cash bid                   | Central IL cash bid                   | St Louis SRW cash bid (1960-1976), Kansas City HRW cash bid (1977-2017) |
|                             | source timing | USDA AMS average daily price in March | USDA AMS average daily price in March | USDA AMS average daily price in March                                   |

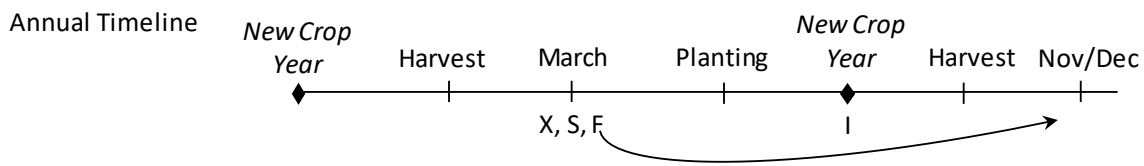

1621  
1622  
1623  
1624  
1625

**Table S4: Data used in price impact model.** All variables measured annually from 1960-2017. All prices deflated by the March Consumer Price Index for all items. The price and inventory variables enter the model in logs.

| Value | Vegetation Type in AgrolBIS               |
|-------|-------------------------------------------|
| 1     | Tropical broadleaf evergreen tree         |
| 2     | Tropical broadleaf drought-deciduous tree |
| 3     | Warm-temperate broadleaf evergreen tree   |
| 4     | Temperate conifer evergreen tree          |
| 5     | Temperate broadleaf cold-deciduous tree   |
| 6     | Boreal conifer evergreen tree             |
| 7     | Boreal broadleaf cold-deciduous tree      |
| 8     | Mixed Forest                              |
| 9     | Savanna                                   |
| 10    | Grassland                                 |
| 11    | Dense Shrubland                           |
| 12    | Open Shrubland                            |
| 13    | Tundra                                    |
| 14    | Desert                                    |
| 15    | Polar Desert                              |
| 16    | Corn                                      |
| 17    | Soybean                                   |
| 18    | Wheat                                     |
| 19    | Alfalfa                                   |
| 20    | Hay                                       |
| 21    | Pasture                                   |
| 22    | Developed / High Intensity (Turf Grass)   |
| 23    | Developed / Medium Intensity (Turf Grass) |
| 24    | Developed / Low Intensity (Turf Grass)    |
| 25    | Developed / Open Space (Turf Grass)       |
| 26    | Herbaceous Wetland                        |
| 27    | Woody Wetland                             |
| 30    | Barren                                    |
| 98    | Open Water                                |

1626

1627 **Table S5. Vegetation types simulated in the agroecosystem modeling.**

| StartYear | EndYear | Dataset Name           | Spatial Resolution | Source                                      |
|-----------|---------|------------------------|--------------------|---------------------------------------------|
| N/A       | N/A     | Potential Vegetation   | 5 arc-minute       | <a href="#">Ramankutty and Foley [1999]</a> |
| 1938      | 1992    | FORE-SCE<br>BACKCAST   | 250 meter          | <a href="#">Sohl et al. [2016]</a>          |
| 1993      | 1998    | FORE-SCE<br>HISTORICAL | 250 meter          | <a href="#">Sohl et al. [2014]</a>          |
| 2001      | 2001    | USGS NLCD 2001         | 30 meter           | <a href="#">Homer et al. [2007]</a>         |
| 2006      | 2006    | USGS NLCD 2006         | 30 meter           | <a href="#">Fry et al. [2011]</a>           |
| 2011      | 2011    | USGS NLCD 2011         | 30 meter           | <a href="#">Homer et al. [2015]</a>         |
| 2008      | 2016    | USDA-NASS CDL          | 30 meter           | <a href="#">USDA [2017]</a>                 |

1628

1629 **Table S6. Land cover datasets used for the agroecosystem modeling.**

Variable/Statistic Name

---

Federal Information Processing Standards (FIPS) county code

Cropland harvested, total area

Cropland, irrigated area

Corn harvested area

Soybeans harvested area

Wheat harvested area

Alfalfa harvested area

Hay harvested area

Non-simulated crops area

Pasture area

Irrigated pasture area

Fraction of cropland harvested that was irrigated

Fraction of pasture that was irrigated

1630

1631

**Table S7. Variables and statistics derived from Ag Census to map historic land cover.**

| Start Year | End Year | Fertilizer | Manure | Source Citation              |
|------------|----------|------------|--------|------------------------------|
| 1945       | 1985     | X          |        | Alexander and Smith, 1990    |
| 1987       | 2006     | X          |        | Gronberg and Spahr, 2012     |
| 2007       | 2012     | X          |        | Brakebill and Gronberg, 2017 |
| 1982       | 1997     |            | X      | Ruddy <i>et al.</i> , 2006   |
| 2002       | 2002     |            | X      | Mueller and Gronberg, 2013   |
| 2007       | 2012     |            | X      | Gronberg and Arnold, 2017    |

1632

1633 **Table S8. Sources of county-level estimates of N and P inputs to the landscape.**

| Crop/Cover Type | Recommended Fertilizer N Rate [lb/acre] | Ratio to Corn (R) | Recommended Fertilizer P <sub>2</sub> O <sub>5</sub> Rate [lb/acre] | Ratio to Corn (R) | Source Citation (state)            |
|-----------------|-----------------------------------------|-------------------|---------------------------------------------------------------------|-------------------|------------------------------------|
| Corn            | 180                                     | 1                 | 80                                                                  | 1                 | Laboski <i>et al.</i> 2012 (WI)    |
| Soy             | 0                                       | 0                 | 50                                                                  | 0.63              | Laboski <i>et al.</i> 2012 (WI)    |
| Wheat           | 70                                      | 0.39              | 35                                                                  | 0.44              | Laboski <i>et al.</i> 2012 (WI)    |
| Alfalfa         | 5                                       | 0.03              | 68                                                                  | 0.85              | Laboski <i>et al.</i> 2012 (WI)    |
| Non-alfalfa hay | 100                                     | 0.56              | 55                                                                  | 0.69              | Laboski <i>et al.</i> 2012 (WI)    |
| Pasture         | 100                                     | 0.56              | 55                                                                  | 0.69              | Laboski <i>et al.</i> 2012 (WI)    |
| Other crop*     | 150                                     | 0.83              | 60                                                                  | 0.75              | Mylavarapu <i>et al.</i> 2015 (FL) |

1634

1635 **Table S9. Recommended fertilizer N and P application rates, and ratios of rates to corn**  
1636 **rate used in mapping.** \*Rates are an average for sorghum and cotton

| Equation                                                                                                    | <i>REA</i>     | <i>Inventory</i> | <i>Futures</i>  | <i>Conv. Yield</i> |
|-------------------------------------------------------------------------------------------------------------|----------------|------------------|-----------------|--------------------|
| <i>Reduced Form Estimates: A<sup>-1</sup>B<sub>1</sub></i>                                                  |                |                  |                 |                    |
| <i>REA</i> <sub>t-1</sub>                                                                                   | 0.52* (0.12)   | -0.24 (0.29)     | 0.04 (0.11)     | -0.07 (0.06)       |
| <i>Inventory</i> <sub>t-1</sub>                                                                             | -0.02 (0.04)   | 0.71* (0.11)     | 0.04 (0.04)     | -0.04* (0.02)      |
| <i>Futures</i> <sub>t-1</sub>                                                                               | -0.04 (0.10)   | 0.90* (0.30)     | 0.71* (0.10)    | -0.06 (0.04)       |
| <i>Conv. Yield</i> <sub>t-1</sub>                                                                           | 0.86* (0.26)   | 1.87* (0.53)     | 0.33 (0.44)     | -0.01 (0.11)       |
| Constant                                                                                                    | 0.11 (0.36)    | -0.20 (1.16)     | 0.37 (0.30)     | 0.60 (0.19)        |
| Trend                                                                                                       | 0.000 (0.003)  | 0.035* (0.013)   | -0.011* (0.004) | 0.000 (0.001)      |
| <i>A Matrix: imposing <math>\alpha_{23} = 4.4 - 1 / (\alpha_{32} + \alpha_{42}(1 + \alpha_{34}))</math></i> |                |                  |                 |                    |
| <i>REA</i>                                                                                                  | 1              | 0                | 0               | 0                  |
| <i>Inventory Supply</i>                                                                                     | 0.65           | 1                | -0.50           | -0.50              |
| <i>Inventory Demand</i>                                                                                     | -0.44          | 0.17             | 1               | -0.12              |
| <i>Supply of Storage</i>                                                                                    | -0.10          | 0.09             | 0               | 1                  |
| <i>A Matrix: Identified Set</i>                                                                             |                |                  |                 |                    |
| <i>REA</i>                                                                                                  | 1              | 0                | 0               | 0                  |
| <i>Inventory Supply</i>                                                                                     | [0.49, 3.04]   | 1                | [-4.25,-0.25]   | [-4.25,-0.25]      |
| <i>Inventory Demand</i>                                                                                     | [-0.44,-0.37]  | [0.15, 0.24]     | 1               | [-0.46, -0.16]     |
| <i>Supply of Storage</i>                                                                                    | [-0.10, -0.08] | [0.09, 0.15]     | 0               | 1                  |
| <i>A Matrix: &gt;90% Confidence Interval</i>                                                                |                |                  |                 |                    |
| <i>REA</i>                                                                                                  | 1              | 0                | 0               | 0                  |
| <i>Inventory Supply</i>                                                                                     | [-0.04, 4.89]  | 1                | [-6.60, -0.25]  | [-6.60, -0.25]     |
| <i>Inventory Demand</i>                                                                                     | [-0.52,-0.25]  | [0.09, 0.30]     | 1               | [-0.93, 0.12]      |
| <i>Supply of Storage</i>                                                                                    | [-0.18, 0.02]  | [0.05, 0.22]     | 0               | 1                  |

1637  
1638  
1639  
1640  
1641  
1642

**Table S10. Soybean VAR parameter estimates.** Sample range: 1961–2005; standard errors in parentheses; \* indicates significance at 5%; model selection criteria values are AIC<sub>C</sub> = -648.86 and BIC = -620.31; for the two-lag model, we obtain AIC<sub>C</sub> = -640.24 and BIC = -583.15, so the one-lag model is favored. We obtain the confidence intervals using a recursive-design wild bootstrap (1).

|                                                                                | 2006-07    | 2007-08    | 2008-09    | 2009-10     | 2010-11     | Average     |
|--------------------------------------------------------------------------------|------------|------------|------------|-------------|-------------|-------------|
| <i>No Inventory-Demand Shocks</i>                                              |            |            |            |             |             |             |
| Inventory                                                                      | 0.00       | 0.00       | 0.00       | 0.00        | 0.00        | 0.00        |
| Fut. Price                                                                     | 0.00       | 0.00       | 0.00       | 0.00        | 0.00        | 0.00        |
| Conv. Yield                                                                    | 0.00       | 0.00       | 0.00       | 0.00        | 0.00        | 0.00        |
| Cash Price                                                                     | 0.00       | 0.00       | 0.00       | 0.00        | 0.00        | 0.00        |
| <i>No Inventory-Demand or -Supply Shocks</i>                                   |            |            |            |             |             |             |
| Inventory                                                                      | 0.61       | -0.28      | -0.85      | -0.66       | -0.35       | -0.31       |
| Fut. Price                                                                     | 0.09       | 0.39       | 0.22       | 0.29        | 0.82        | 0.36        |
| Conv. Yield                                                                    | -0.06      | 0.04       | 0.10       | 0.06        | 0.03        | 0.03        |
| Cash Price                                                                     | 0.04       | 0.43       | 0.31       | 0.35        | 0.85        | 0.40        |
| <i>No Inventory-Demand Shocks</i>                                              |            |            |            |             |             |             |
| <i>Inventory-Supply Shocks from Production and China-Import Surprises Only</i> |            |            |            |             |             |             |
| Inventory                                                                      | -0.19      | 0.12       | 0.56       | 0.89        | 0.58        | 0.39        |
| Fut. Price                                                                     | 0.24       | 0.36       | -0.03      | -0.07       | 0.51        | 0.20        |
| Conv. Yield                                                                    | 0.02       | -0.01      | -0.04      | -0.08       | -0.04       | -0.03       |
| Cash Price                                                                     | 0.26       | 0.36       | -0.07      | -0.14       | 0.47        | 0.18        |
| <i>No Inventory-Demand Shocks (95% confidence band)</i>                        |            |            |            |             |             |             |
| <i>Inventory-Supply Shocks from Production and China-Import Surprises Only</i> |            |            |            |             |             |             |
| Inventory                                                                      | -0.51 0.15 | -0.34 0.70 | -0.25 1.26 | -0.21 1.55  | -0.65 1.31  | -0.32 0.94  |
| Fut. Price                                                                     | 0.09 0.37  | 0.09 0.63  | -0.35 0.34 | -0.41 0.34  | 0.12 0.97   | -0.07 0.52  |
| Conv. Yield                                                                    | -0.04 0.09 | -0.09 0.07 | -0.12 0.02 | -0.20 0.01  | -0.15 0.05  | -0.09 0.03  |
| Cash Price                                                                     | 0.07 0.43  | 0.04 0.67  | -0.39 0.31 | -0.47 0.27  | 0.10 0.94   | -0.10 0.50  |
| <i>Identified Set</i>                                                          |            |            |            |             |             |             |
| <i>No Inventory-Demand Shocks</i>                                              |            |            |            |             |             |             |
| <i>Inventory-Supply Shocks from Production and China-Import Surprises Only</i> |            |            |            |             |             |             |
| Inventory                                                                      | -0.26 0.34 | 0.11 0.12  | -0.06 0.65 | 0.30 0.99   | 0.21 0.68   | 0.18 0.43   |
| Fut. Price                                                                     | 0.18 0.24  | 0.34 0.37  | -0.02 0.02 | -0.04 0.01  | 0.54 0.57   | 0.22 0.23   |
| Conv. Yield                                                                    | -0.05 0.02 | -0.01 0.01 | -0.05 0.05 | -0.08 -0.03 | -0.05 -0.02 | -0.03 -0.01 |
| Cash Price                                                                     | 0.13 0.27  | 0.34 0.37  | -0.07 0.07 | -0.12 -0.02 | 0.49 0.55   | 0.19 0.22   |
| <i>Identified Set (&gt;95% confidence band)</i>                                |            |            |            |             |             |             |
| <i>No Inventory-Demand Shocks</i>                                              |            |            |            |             |             |             |
| <i>Inventory-Supply Shocks from Production and China-Import Surprises Only</i> |            |            |            |             |             |             |
| Inventory                                                                      | -0.57 0.68 | -0.37 0.71 | -0.88 1.34 | -0.71 1.66  | -0.92 1.40  | -0.50 0.98  |
| Fut. Price                                                                     | 0.03 0.37  | 0.10 0.64  | -0.34 0.40 | -0.40 0.42  | 0.14 1.02   | -0.06 0.54  |
| Conv. Yield                                                                    | -0.11 0.09 | -0.09 0.08 | -0.13 0.12 | -0.20 0.04  | -0.15 0.05  | -0.09 0.04  |
| Cash Price                                                                     | -0.06 0.44 | 0.05 0.67  | -0.39 0.48 | -0.46 0.39  | 0.11 1.01   | -0.09 0.54  |
| <i>Production Surprises (MMT)</i>                                              |            |            |            |             |             |             |
| Actual Prod.                                                                   | 87.0       | 72.9       | 80.7       | 91.5        | 90.7        |             |
| May Forecast                                                                   | 83.8       | 74.7       | 84.5       | 87.0        | 90.1        |             |
| Surprise                                                                       | 3.2        | -1.8       | -3.8       | 4.5         | 0.6         |             |
| <i>China Import Surprises (MMT)</i>                                            |            |            |            |             |             |             |
| Actual Imports                                                                 | 28.7       | 37.8       | 41.1       | 50.3        | 52.3        |             |
| May Forecast                                                                   | 31.5       | 34.5       | 35.5       | 38.1        | 49.0        |             |
| Surprise                                                                       | -2.8       | 3.3        | 5.6        | 12.2        | 3.3         |             |
| Total Surprise                                                                 | 6.0        | -5.2       | -9.4       | -7.7        | -2.8        |             |

1643  
1644  
1645  
1646  
1647  
1648  
1649  
1650

**Table S11. Log difference between actual and counterfactual for soybeans.** Here we define the log cash price as log futures plus convenience yield. Table entries are results from the BAU calculations described in the text. Total surprise is production surprise minus China import surprise. Surprise terms divided by 6.6 MMT, which is average soybean inventory from 1996-2005. Because the identifying assumptions differ slightly, there is no requirement that the point identified parameters lie in the identified set.



| Equation                                                                                                    | REA            | Inventory      | Futures         | Conv. Yield    |
|-------------------------------------------------------------------------------------------------------------|----------------|----------------|-----------------|----------------|
| <i>Reduced Form Estimates: A<sup>-1</sup>B<sub>1</sub></i>                                                  |                |                |                 |                |
| <i>REA</i> <sub>t-1</sub>                                                                                   | 0.59* (0.14)   | -0.51* (0.19)  | 0.42* (0.15)    | -0.02 (0.07)   |
| <i>Inventory</i> <sub>t-1</sub>                                                                             | -0.05 (0.07)   | 0.71* (0.09)   | 0.07 (0.06)     | 0.04 (0.04)    |
| <i>Futures</i> <sub>t-1</sub>                                                                               | -0.16 (0.10)   | 0.58* (0.17)   | 0.53* (0.10)    | -0.05 (0.05)   |
| <i>Conv. Yield</i> <sub>t-1</sub>                                                                           | 0.01 (0.24)    | -0.10 (0.38)   | 0.18 (0.28)     | 0.31* (0.13)   |
| Constant                                                                                                    | 0.85 (0.77)    | 1.80 (1.11)    | 0.17 (0.69)     | -0.21 (0.37)   |
| Trend                                                                                                       | -0.005 (0.004) | 0.016* (0.006) | -0.014* (0.004) | 0.001 (0.002)  |
| <i>A Matrix: imposing <math>\alpha_{23} = 4.4 - 1 / (\alpha_{32} + \alpha_{42}(1 + \alpha_{34}))</math></i> |                |                |                 |                |
| <i>REA</i>                                                                                                  | 1              | 0              | 0               | 0              |
| <i>Inventory Supply</i>                                                                                     | 2.11           | 1              | -3.44           | -3.44          |
| <i>Inventory Demand</i>                                                                                     | 0.04           | 0.81           | 1               | 0.44           |
| <i>Supply of Storage</i>                                                                                    | 0.11           | 0.16           | 0               | 1              |
| <i>A Matrix: Identified Set</i>                                                                             |                |                |                 |                |
| <i>REA</i>                                                                                                  | 1              | 0              | 0               | 0              |
| <i>Inventory Supply</i>                                                                                     | [0.71, 1.25]   | 1              | [-1.47,-0.25]   | [-1.47,-0.25]  |
| <i>Inventory Demand</i>                                                                                     | [-0.16,-0.04]  | [0.48, 0.68]   | 1               | [0.56, 0.64]   |
| <i>Supply of Storage</i>                                                                                    | [0.09, 0.10]   | [0.12, 0.14]   | 0               | 1              |
| <i>A Matrix: &gt;90% Confidence Interval</i>                                                                |                |                |                 |                |
| <i>REA</i>                                                                                                  | 1              | 0              | 0               | 0              |
| <i>Inventory Supply</i>                                                                                     | [0.42, 1.72]   | 1              | [-1.82, -0.25]  | [-1.82, -0.25] |
| <i>Inventory Demand</i>                                                                                     | [-0.29,0.15]   | [0.35, 0.78]   | 1               | [0.20, 0.95]   |
| <i>Supply of Storage</i>                                                                                    | [0.02, 0.20]   | [0.07, 0.20]   | 0               | 1              |

1651  
1652  
1653  
1654  
1655

**Table S12. Wheat VAR parameter estimates.** Sample range: 1961–2005; standard errors in parentheses; \*indicates significance at 5%; model selection criteria values are AICc=-648.86 and BIC=-620.31; for the two-lag model, we obtain AICc = -640.24 and BIC = -583.15, so the one-lag model is favored. We obtain the confidence intervals using a recursive-design wild bootstrap (1).

|                                                               | 2006-07     | 2007-08     | 2008-09     | 2009-10     | 2010-11    | Average    |
|---------------------------------------------------------------|-------------|-------------|-------------|-------------|------------|------------|
| <i>No Inventory-Demand Shocks</i>                             |             |             |             |             |            |            |
| Inventory                                                     | 0.00        | 0.00        | 0.00        | 0.00        | 0.00       | 0.00       |
| Fut. Price                                                    | 0.00        | 0.00        | 0.00        | 0.00        | 0.00       | 0.00       |
| Conv. Yield                                                   | 0.00        | 0.00        | 0.00        | 0.00        | 0.00       | 0.00       |
| Cash Price                                                    | 0.00        | 0.00        | 0.00        | 0.00        | 0.00       | 0.00       |
| <i>No Inventory-Demand or -Supply Shocks</i>                  |             |             |             |             |            |            |
| Inventory                                                     | -0.06       | -0.28       | 0.21        | 0.60        | 0.34       | 0.16       |
| Fut. Price                                                    | -0.01       | 0.52        | 0.07        | -0.12       | 0.39       | 0.17       |
| Conv. Yield                                                   | 0.01        | 0.04        | -0.04       | -0.07       | 0.02       | -0.01      |
| Cash Price                                                    | 0.00        | 0.56        | 0.03        | -0.19       | 0.41       | 0.16       |
| <i>No Inventory-Demand Shocks</i>                             |             |             |             |             |            |            |
| <i>Inventory-Supply Shocks from Production Surprises Only</i> |             |             |             |             |            |            |
| Inventory                                                     | -0.04       | -0.23       | 0.18        | 0.52        | 0.27       | 0.14       |
| Fut. Price                                                    | -0.03       | 0.48        | 0.09        | -0.06       | 0.45       | 0.18       |
| Conv. Yield                                                   | 0.01        | 0.03        | -0.03       | -0.06       | 0.02       | -0.01      |
| Cash Price                                                    | -0.03       | 0.51        | 0.05        | -0.12       | 0.47       | 0.18       |
| <i>No Inventory-Demand Shocks (95% confidence band)</i>       |             |             |             |             |            |            |
| <i>Inventory-Supply Shocks from Production Surprises Only</i> |             |             |             |             |            |            |
| Inventory                                                     | -0.23 0.17  | -0.61 0.08  | -0.40 0.60  | -0.10 1.00  | -0.41 0.86 | -0.32 0.53 |
| Fut. Price                                                    | -0.15 0.09  | 0.29 0.73   | -0.17 0.45  | -0.31 0.29  | 0.21 0.79  | -0.01 0.46 |
| Conv. Yield                                                   | -0.06 0.06  | -0.05 0.11  | -0.15 0.05  | -0.17 0.02  | -0.09 0.09 | -0.10 0.06 |
| Cash Price                                                    | -0.13 0.10  | 0.34 0.74   | -0.18 0.38  | -0.33 0.21  | 0.24 0.79  | 0.00 0.43  |
| <i>Identified Set</i>                                         |             |             |             |             |            |            |
| <i>No Inventory-Demand Shocks</i>                             |             |             |             |             |            |            |
| <i>Inventory-Supply Shocks from Production Surprises Only</i> |             |             |             |             |            |            |
| Inventory                                                     | -0.02 0.02  | -0.19 -0.13 | 0.14 0.16   | 0.30 0.43   | -0.06 0.15 | 0.05 0.10  |
| Fut. Price                                                    | -0.04 -0.04 | 0.46 0.46   | 0.10 0.11   | -0.03 -0.01 | 0.50 0.53  | 0.20 0.21  |
| Conv. Yield                                                   | 0.00 0.00   | 0.02 0.02   | -0.03 -0.02 | -0.04 -0.02 | 0.03 0.04  | 0.00 0.00  |
| Cash Price                                                    | -0.05 -0.04 | 0.48 0.49   | 0.07 0.09   | -0.07 -0.02 | 0.53 0.58  | 0.20 0.22  |
| <i>Identified Set (&gt;95% confidence band)</i>               |             |             |             |             |            |            |
| <i>No Inventory-Demand Shocks</i>                             |             |             |             |             |            |            |
| <i>Inventory-Supply Shocks from Production Surprises Only</i> |             |             |             |             |            |            |
| Inventory                                                     | -0.21 0.22  | -0.58 0.17  | -0.47 0.58  | -0.33 0.92  | -0.73 0.76 | -0.41 0.49 |
| Fut. Price                                                    | -0.16 0.08  | 0.27 0.72   | -0.16 0.48  | -0.27 0.35  | 0.25 0.87  | 0.00 0.49  |
| Conv. Yield                                                   | -0.07 0.06  | -0.06 0.10  | -0.14 0.07  | -0.15 0.06  | -0.08 0.11 | -0.10 0.07 |
| Cash Price                                                    | -0.15 0.09  | 0.31 0.72   | -0.17 0.43  | -0.29 0.30  | 0.29 0.88  | 0.02 0.47  |
| <i>Production Surprises (MMT)</i>                             |             |             |             |             |            |            |
| Actual Prod.                                                  | 49.2        | 55.8        | 68.4        | 60.1        | 58.9       |            |
| May Forecast                                                  | 51.0        | 59.2        | 65.1        | 55.1        | 55.6       |            |
| Surprise                                                      | -1.8        | -3.3        | 3.3         | 5.0         | 3.3        |            |

1656  
1657  
1658  
1659  
1660  
1661  
1662  
1663

**Table S13. Log difference between actual and counterfactual for wheat.** Here we define the log cash price as log futures plus convenience yield. Table entries are results from the BAU calculations described in the text. Surprise terms divided by 18.7 MMT, which is average wheat inventory from 1996-2005. Because the identifying assumptions differ slightly, there is no requirement that the point identified parameters lie in the identified set.

| Elasticity with<br>Respect to | Crop Rotation       |                     |                     |
|-------------------------------|---------------------|---------------------|---------------------|
|                               | Corn-Corn           | Corn-Other          | Other-Other         |
| Price of Corn                 | 1.644**<br>(0.198)  | 0.179**<br>(0.065)  | -1.315**<br>(0.238) |
| Price of Other<br>Crops       | -1.314**<br>(0.261) | -0.221**<br>(0.085) | 0.891**<br>(0.215)  |

1664  
1665  
1666  
1667  
1668  
1669

**Table S14. Long-Run Crop Rotation Elasticities.** Bootstrap standard errors are in parentheses. Note \* and \*\* denote significance at the 10% and 5% levels, respectively. The results in this table are replicated from results in table A10 in the supplementary appendix of Pates and Hendricks(17).

| Elasticity with<br>Respect to | Corn Area Elasticity |
|-------------------------------|----------------------|
| Price of Corn                 | 0.574**<br>(0.045)   |
| Price of Other<br>Crops       | -0.467**<br>(0.062)  |

1670  
1671  
1672  
1673

**Table S15. Long-Run Aggregate Corn Acreage Elasticities.** Bootstrap standard errors are in parentheses. Note \* and \*\* denote significance at the 10% and 5% levels, respectively. The results in this table are replicated from results in table 3 of Pates and Hendricks (17).

| Rotation                 | NO <sub>3</sub> Leaching [kg/ha] | P runoff [kg/ha] | Sediment loss [tons/km <sup>2</sup> ] |
|--------------------------|----------------------------------|------------------|---------------------------------------|
| CC = continuous corn     | 41.6 ± 27.5                      | 0.282 ± 0.279    | 22.2 ± 35.0                           |
| SS = continuous soy      | 15.8 ± 12.4                      | 0.179 ± 0.224    | 14.2 ± 22.5                           |
| CS = corn-soy rotation   | 28.8 ± 19.5                      | 0.231 ± 0.250    | 18.2 ± 28.8                           |
| WW = continuous wheat    | 17.0 ± 11.3                      | 0.202 ± 0.272    | 13.0 ± 20.6                           |
| CW = corn-wheat rotation | 29.4 ± 18.8                      | 0.242 ± 0.272    | 17.6 ± 27.8                           |

1674 **Table S16. Average field-level water quality impacts** (+/- one standard deviation) across  
1675 CONUS cropland over 2007-16 time period for different cropping rotations.

| Rotation                 | Fertilizer N<br>[kg/ha] | Fertilizer P<br>[kg/ha] | Manure N<br>[kg/ha] | Manure P<br>[kg/ha] |
|--------------------------|-------------------------|-------------------------|---------------------|---------------------|
| CC = continuous corn     | 174 ± 49.9              | 17.9 ± 6.50             | 18.9 ± 36.7         | 5.60 ± 11.5         |
| SS = continuous soy      | 0 ± 0                   | 11.2 ± 4.09             | 18.9 ± 36.7         | 5.60 ± 11.5         |
| CS = corn-soy rotation   | 86.8 ± 25.0             | 14.5 ± 6.38             | 18.9 ± 36.7         | 5.60 ± 11.5         |
| WW = continuous wheat    | 68.9 ± 25.4             | 7.82 ± 2.88             | 18.9 ± 36.7         | 5.60 ± 11.5         |
| CW = corn-wheat rotation | 121 ± 65.7              | 12.8 ± 7.10             | 18.9 ± 36.7         | 5.60 ± 11.5         |

1676  
1677  
1678

**Table S17: Fertilizer and manure inputs to each cropping rotation.** Average (+/- one standard deviation) fertilizer and manure nitrogen and phosphorus across CONUS cropland.

| CC compared to XX | NO <sub>3</sub> Leaching [kg/ha] | P runoff [kg/ha] | Sediment loss [tons/km <sup>2</sup> ] |
|-------------------|----------------------------------|------------------|---------------------------------------|
| CC-SS             | 25.8 ± 17.5                      | 0.102 ± 0.080    | 8.01 ± 12.51                          |
| CC-CS             | 12.9 ± 8.8                       | 0.051 ± 0.040    | 4.00 ± 6.25                           |
| CC-WW             | 24.6 ± 18.5                      | 0.080 ± 0.099    | 9.20 ± 14.51                          |
| CC-CW             | 12.2 ± 9.34                      | 0.039 ± 0.051    | 4.60 ± 7.25                           |

1679  
1680  
1681  
1682  
1683

**Table S18: Corn intensification impact.** Average (+/- one standard deviation) difference of impacts due to continuous corn to impacts from other cropping rotations, i.e. the differential impact of continuous corn compared to the other rotations.

| Elasticity with Respect to | Type of Transition           |                             |                          |                         |
|----------------------------|------------------------------|-----------------------------|--------------------------|-------------------------|
|                            | Expand Cropland from Pasture | Abandon Cropland to Pasture | Expand Cropland from CRP | Abandon Cropland to CRP |
| Price of Crops             | -0.015<br>(0.073)            | 0.014<br>(0.053)            | 7.350**<br>(0.323)       | -1.218**<br>(0.096)     |
| Pasture Rent               | -0.298**<br>(0.079)          | -0.685**<br>(0.050)         |                          |                         |
| CRP Rent                   |                              |                             | -0.394**<br>(0.129)      | 0.227**<br>(0.091)      |

1684  
1685  
1686  
1687

**Table S19. Five-Year Cropland Transition Elasticities.** Bootstrap standard errors are in parentheses. Note \* and \*\* denote significance at the 10% and 5% levels, respectively.



| Elasticity with Respect to | Cropland Area Elasticity |
|----------------------------|--------------------------|
| Price of Crops             | 0.071**<br>(0.005)       |
| Pasture Rent               | 0.024**<br>(0.004)       |
| CRP Rent                   | -0.005**<br>(0.001)      |

1688  
1689  
1690

**Table S20. Five-Year Aggregate Cropland Area Elasticities.** Bootstrap standard errors are in parentheses. Note \* and \*\* denote significance at the 10% and 5% levels, respectively.

| Expand Cropland from<br>Pasture or CRP |                           |  | Abandon Cropland to<br>Pasture or CRP |                          | Net Change                |
|----------------------------------------|---------------------------|--|---------------------------------------|--------------------------|---------------------------|
| Region                                 | Change (ha)               |  | Region                                | Change (ha)              |                           |
| F                                      | 673,049 **<br>(52,699)    |  | F                                     | 47,678<br>(41,453)       | 625,371 **<br>(67,061)    |
| H                                      | 314,044 **<br>(40,129)    |  | H                                     | -62,641 *<br>(33,776)    | 376,685 **<br>(52,391)    |
| JNOP                                   | -41,023<br>(64,234)       |  | JNOP                                  | 19,443<br>(31,389)       | -60,465<br>(72,313)       |
| KL                                     | -16,834<br>(56,325)       |  | KL                                    | -82,820 *<br>(44,700)    | 65,987<br>(71,843)        |
| Mcrop                                  | 95,368 **<br>(39,825)     |  | Mcrop                                 | -8,917<br>(45,072)       | 104,285 *<br>(59,688)     |
| Mgrass                                 | 759,093 **<br>(97,651)    |  | Mgrass                                | -257,218 **<br>(76,002)  | 1,016,311 **<br>(125,091) |
| RST                                    | 11,969<br>(20,716)        |  | RST                                   | -9,707<br>(18,899)       | 21,677<br>(28,194)        |
| Total                                  | 1,795,668 **<br>(151,295) |  |                                       | -354,183 **<br>(119,121) | 2,149,851 **<br>(193,298) |

1691  
1692  
1693  
1694

**Table S21. Predicted changes in transitions of cropland with pasture or CRP due to RFS.** Bootstrap standard errors are in parentheses. Note \* and \*\* denote significance at the 10% and 5% levels, respectively.

| Expand Cropland from Pasture |                        | Abandon Cropland to Pasture |                         | Net Change              |
|------------------------------|------------------------|-----------------------------|-------------------------|-------------------------|
| Region                       | Change (ha)            | Region                      | Change (ha)             |                         |
| F                            | 33,532<br>(27,503)     | F                           | 98,394 **<br>(38,556)   | -64,862<br>(47,251)     |
| H                            | -9,347<br>(31,021)     | H                           | 35,468<br>(32,399)      | -44,814<br>(44,421)     |
| JNOP                         | -116,488 *<br>(63,763) | JNOP                        | 45,590<br>(30,692)      | -162,079 **<br>(71,323) |
| KL                           | -68,019<br>(55,507)    | KL                          | -74,499 *<br>(44,643)   | 6,480<br>(70,844)       |
| Mcrop                        | 15,464<br>(38,490)     | Mcrop                       | 29,689<br>(41,713)      | -14,225<br>(55,925)     |
| Mgrass                       | 124,978<br>(93,895)    | Mgrass                      | -206,332 **<br>(74,291) | 331,310 **<br>(120,494) |
| RST                          | 301<br>(20,612)        | RST                         | -5,303<br>(18,741)      | 5,604<br>(27,816)       |
| Total                        | -19,580<br>(138,067)   |                             | -76,993<br>(114,138)    | 57,413<br>(178,807)     |

1695  
1696  
1697  
1698

**Table S22. Predicted changes in transitions of cropland with pasture due to the RFS.** Bootstrap standard errors are in parentheses. Note \* and \*\* denote significance at the 10% and 5% levels, respectively.

| Expand Cropland from CRP |             |    | Abandon Cropland to CRP |             |    | Net Change   |
|--------------------------|-------------|----|-------------------------|-------------|----|--------------|
| Region                   | Change (ha) |    | Region                  | Change (ha) |    |              |
| F                        | 639,518     | ** | F                       | -50,715     | ** | 690,233 **   |
|                          | (45,751)    |    |                         | (14,671)    |    | (47,816)     |
| H                        | 323,391     | ** | H                       | -98,109     | ** | 421,500 **   |
|                          | (26,084)    |    |                         | (9,258)     |    | (27,738)     |
| JNOP                     | 75,466      | ** | JNOP                    | -26,148     | ** | 101,613 **   |
|                          | (9,560)     |    |                         | (6,473)     |    | (11,300)     |
| KL                       | 51,186      | ** | KL                      | -8,321      | ** | 59,507 **    |
|                          | (9,827)     |    |                         | (3,707)     |    | (10,630)     |
| Mcrop                    | 79,904      | ** | Mcrop                   | -38,606     | ** | 118,510 **   |
|                          | (10,065)    |    |                         | (16,468)    |    | (19,416)     |
| Mgrass                   | 634,115     | ** | Mgrass                  | -50,887     | ** | 685,002 **   |
|                          | (28,819)    |    |                         | (14,127)    |    | (31,993)     |
| RST                      | 11,669      | ** | RST                     | -4,404      | ** | 16,073 **    |
|                          | (4,116)     |    |                         | (2,334)     |    | (4,670)      |
| Total                    | 1,815,248   | ** |                         | -277,190    | ** | 2,092,438 ** |
|                          | (61,823)    |    |                         | (29,175)    |    | (68,261)     |

1699  
1700  
1701  
1702

**Table S23. Predicted changes in transitions of cropland with CRP due to RFS.** Bootstrap standard errors are in parentheses. Note \* and \*\* denote significance at the 10% and 5% levels, respectively.

1703 **SI References**

1704

- 1705 1. C. A. Carter, G. C. Rausser, A. Smith, Commodity storage and the market effects  
1706 of biofuel policies. *American Journal of Agricultural Economics* **99**, 1027–1055  
1707 (2017).
- 1708 2. J. C. Williams, B. D. Wright, *Storage and commodity markets*. (Cambridge  
1709 university press, 1991).
- 1710 3. C. A. Carter, G. C. Rausser, A. Smith, Commodity Booms and Busts. *Annual*  
1711 *Review of Resource Economics* **3**, 87–118 (2011).
- 1712 4. M. K. Adjemian, A. Smith, Using USDA Forecasts to Estimate the Price  
1713 Flexibility of Demand for Agricultural Commodities. *American Journal of*  
1714 *Agricultural Economics* **94**, 978–995 (2012).
- 1715 5. N. P. Hendricks, A. Smith, D. A. Sumner, Crop Supply Dynamics and the Illusion  
1716 of Partial Adjustment. *Am J Agric Econ* **96**, 1469–1491 (2014).
- 1717 6. L. Kilian, Not All Oil Price Shocks Are Alike: Disentangling Demand and Supply  
1718 Shocks in the Crude Oil Market. *American Economic Review* **99**, 1053–1069  
1719 (2009).
- 1720 7. S. Gonçalves, L. Kilian, Bootstrapping autoregressions with conditional  
1721 heteroskedasticity of unknown form. *Journal of Econometrics* **123**, 89–120 (2004).
- 1722 8. P. Garcia, S. H. Irwin, A. Smith, Futures Market Failure? *Am J Agric Econ* **97**, 40–  
1723 64 (2015).
- 1724 9. N. P. Hendricks, *et al.*, The environmental effects of crop price increases: Nitrogen  
1725 losses in the US Corn Belt. *Journal of Environmental Economics and Management*  
1726 **68**, 507–526 (2014).
- 1727 10. J. Woodard, Big data and Ag-Analytics: An open source, open data platform for  
1728 agricultural & environmental finance, insurance, and risk. *Agricultural Finance*  
1729 *Review* **76**, 15–26 (2016).
- 1730 11. F. S. A. USDA, FSA Common Land Unit infosheet (2012) (July 15, 2015).
- 1731 12. L. Yan, D. P. Roy, Automated crop field extraction from multi-temporal Web  
1732 Enabled Landsat Data. *Remote Sensing of Environment* **144**, 42–64 (2014).
- 1733 13. C. Boryan, Z. Yang, R. Mueller, M. Craig, Monitoring US agriculture: the US  
1734 Department of Agriculture, National Agricultural Statistics Service, Cropland Data  
1735 Layer Program. *Geocarto International* **26**, 341–358 (2011).
- 1736 14. N. R. C. S. Soil Survey Staff United States Department of Agriculture, Soil Survey  
1737 Geographic (SSURGO) Database for the United States (November 15, 2018).

- 1738 15. C. Daly, *et al.*, High-quality spatial climate data sets for the United States and  
1739 beyond. *Transactions of the ASAE* **43**, 1957 (2000).
- 1740 16. Bloomberg L.P., “Local US agricultural spot and commodity futures prices.”  
1741 (November 8, 2017).
- 1742 17. N. J. Pates, N. P. Hendricks, Fields from Afar: Evidence of Heterogeneity in  
1743 United States Corn Rotational Response from Remote Sensing Data. *American*  
1744 *Journal of Agricultural Economics* **n/a** (2021).
- 1745 18. USDA, “2012 National Resources Inventory: Summary Report” (Natural  
1746 Resources Conservation Service , 2015).
- 1747 19. E. R. S. USDA, “USDA ERS - Agricultural Baseline Database” (May 21, 2020).
- 1748 20. E. R. S. USDA, “USDA ERS - Commodity Costs and Returns” (May 21, 2020).
- 1749 21. D. Hofstrand, W. Edwards, “Computing a Pasture Rental Rate” (2015) (June 10,  
1750 2020).
- 1751 22. J. Atwood, T. Watts, K. Price, J. Kastens, The big picture - Satellite remote sensing  
1752 applications in rangeland assessment and crop insurance in (2005) (May 21, 2020).
- 1753 23. USDA NASS, QuickStats (2012) (May 10, 2012).
- 1754 24. M. Stubbs, Conservation Reserve Program (CRP): Status and Issues.  
1755 *Congressional Research Service*, 7–5700 (2012).
- 1756 25. N. P. Hendricks, Potential Benefits from Innovations to Reduce Heat and Water  
1757 Stress in Agriculture. *Journal of the Association of Environmental and Resource*  
1758 *Economists* **5**, 545–576 (2018).
- 1759 26. R. N. Lubowski, A. J. Plantinga, R. N. Stavins, What drives land-use change in the  
1760 United States? A national analysis of landowner decisions. *Land Economics* **84**,  
1761 529–550 (2008).
- 1762 27. B. S. Rashford, J. A. Walker, C. T. Bastian, Economics of grassland conversion to  
1763 cropland in the Prairie Pothole Region. *Conservation Biology* **25**, 276–284 (2011).
- 1764 28. J. J. Lawler, *et al.*, Projected land-use change impacts on ecosystem services in the  
1765 United States. *Proceedings of the National Academy of Sciences* **111**, 7492–7497  
1766 (2014).
- 1767 29. C. Langpap, J. Wu, Potential Environmental Impacts of Increased Reliance on  
1768 Corn-Based Bioenergy. *Environmental and Resource Economics* **49**, 147–171  
1769 (2011).

- 1770 30. R. Claassen, C. Langpap, J. Wu, Impacts of Federal Crop Insurance on Land Use  
1771 and Environmental Quality. *American Journal of Agricultural Economics* **83**,  
1772 aaw075 (2016).
- 1773 31. J. M. Wooldridge, *Econometric analysis of cross section and panel data* (MIT  
1774 press, 2010).
- 1775 32. T. J. Lark, J. M. Salmon, H. K. Gibbs, Cropland expansion outpaces agricultural  
1776 and biofuel policies in the United States. *Environ. Res. Lett.* **10**, 044003 (2015).
- 1777 33. T. J. Lark, R. M. Mueller, D. M. Johnson, H. K. Gibbs, Measuring land-use and  
1778 land-cover change using the U.S. department of agriculture’s cropland data layer:  
1779 Cautions and recommendations. *International Journal of Applied Earth  
1780 Observation and Geoinformation* **62**, 224–235 (2017).
- 1781 34. T. Lark, M. Bougie, S. Spawn, H. Gibbs, “Cropland Expansion in the United  
1782 States, 2008-2016” (University of Wisconsin-Madison, 2018).
- 1783 35. M. Motew, *et al.*, The Influence of Legacy P on Lake Water Quality in a  
1784 Midwestern Agricultural Watershed. *Ecosystems* **20**, 1468–1482 (2017).
- 1785 36. S. D. Donner, C. J. Kucharik, Corn-based ethanol production compromises goal of  
1786 reducing nitrogen export by the Mississippi River. *Proceedings of the National  
1787 Academy of Sciences* **105**, 4513–4518 (2008).
- 1788 37. T. Lark, S. Spawn, M. Bougie, H. Gibbs, Cropland expansion in the United States  
1789 produces marginal yields at high costs to wildlife. *Nature Communications*  
1790 (Accepted, in press).
- 1791 38. N. W. Chaney, *et al.*, POLARIS Soil Properties: 30-m Probabilistic Maps of Soil  
1792 Properties Over the Contiguous United States. *Water Resour Res* **55**, 2916–2938  
1793 (2019).
- 1794 39. E. Benham, R. J. Ahrens, W. D. Nettleton, “Clarification of Soil Textural Class  
1795 Boundaries” (U.S. Department of Agriculture, Natural Resources Conservation  
1796 Service, National Soil Survey Center, 2009).
- 1797 40. , “Elevation derivatives for national applications” (2005)  
1798 <https://doi.org/10.3133/fs20053049>.
- 1799 41. L. W. Zevenbergen, C. R. Thorne, Quantitative-Analysis of Land Surface-  
1800 Topography. *Earth Surf Processes* **12**, 47–56 (1987).
- 1801 42. P. Panagos, P. Borrelli, K. Meusburger, New European Slope Length and  
1802 Steepness Factor (LS-Factor) for Modeling Soil Erosion by Water. *Geosciences* **5**,  
1803 117–126 (2015).

- 1804 43. T. G. Freeman, Calculating Catchment-Area with Divergent Flow Based on a  
1805 Regular Grid. *Comput Geosci* **17**, 413–422 (1991).
- 1806 44. P. Quinn, K. Beven, P. Chevallier, O. Planchon, The Prediction of Hillslope Flow  
1807 Paths for Distributed Hydrological Modeling Using Digital Terrain Models.  
1808 *Hydrol Process* **5**, 59–79 (1991).
- 1809 45. P. J. J. Desmet, G. Govers, A GIS procedure for automatically calculating the  
1810 USLE LS factor on topographically complex landscape units. *J Soil Water Conserv*  
1811 **51**, 427–433 (1996).
- 1812 46. V. Olaya, “Basic land-surface parameters” in *Geomorphometry: Concepts,*  
1813 *Software, Applications. Developments in Soil Science, 33.*, T. Hengl, H. I. Reuter,  
1814 Eds. (Elsevier, 2009), pp. 141–169.
- 1815 47. L. McKay, *et al.*, NHDPlus Version 2: User Guide (2012).
- 1816 48. J. R. Williams, “Sediment-yield prediction with Universal Equation using runoff  
1817 energy factor” in *Present and Prospective Technology for Predicting Sediment*  
1818 *Yield and Sources. Vol. ARS-S-40.*, (U.S. Department of Agriculture, Agricultural  
1819 Research Service, 1975), pp. 244–252.
- 1820 49. M. Haines, P. Fishback, P. Rhode, United States Agriculture Data, 1840 - 2012  
1821 (2018) <https://doi.org/10.3886/ICPSR35206.v4>.
- 1822 50. S. Manson, J. Schroeder, D. V. Riper, S. Ruggles, IPUMS National Historical  
1823 Geographic Information System: Version 13.0 (2018)  
1824 <https://doi.org/10.18128/D050.V13.0>.
- 1825 51. N. Ramankutty, J. A. Foley, Estimating historical changes in global land cover:  
1826 Croplands from 1700 to 1992. *Global Biogeochem Cy* **13**, 997–1027 (1999).
- 1827 52. J. Fry, *et al.*, Completion of the 2006 National Land Cover Database for the  
1828 Conterminous United States. *Photogrammetric Engineering and Remote Sensing*  
1829 **77**, 858–864 (2011).
- 1830 53. C. Homer, *et al.*, Completion of the 2001 National Land Cover Database for the  
1831 conterminous United States. *Photogramm Eng Rem S* **73**, 337–341 (2007).
- 1832 54. C. Homer, *et al.*, Completion of the 2011 National Land Cover Database for the  
1833 conterminous United States—representing a decade of land cover change  
1834 information. *Photogrammetric Engineering & Remote Sensing* **81**, 345–354  
1835 (2015).
- 1836 55. T. Sohl, *et al.*, Modeled historical land use and land cover for the conterminous  
1837 United States. *J Land Use Sci* **11**, 476–499 (2016).



- 1838 56. T. L. Sohl, *et al.*, Spatially explicit modeling of 1992–2100 land cover and forest  
1839 stand age for the conterminous United States. *Ecological Applications* **24**, 1015–  
1840 1036 (2014).
- 1841 57. Q. F. Hamlin, *et al.*, Quantifying Landscape Nutrient Inputs With Spatially  
1842 Explicit Nutrient Source Estimate Maps. *Journal of Geophysical Research:*  
1843 *Biogeosciences* **125**, e2019JG005134 (2020).
- 1844 58. R. B. Alexander, R. A. Smith, “County-Level Estimates of Nitrogen and  
1845 Phosphorus Fertilizer Use in the United States, 1945 to 1985. Open-File Report 90-  
1846 130” (U.S. Geological Survey, 1990).
- 1847 59. J. W. Brakebill, J. A. M. Gronberg, County-Level Estimates of Nitrogen and  
1848 Phosphorus from Commercial Fertilizer for the Conterminous United States, 1987-  
1849 2012 (2017) <https://doi.org/10.5066/F7H41PKX> (February 27, 2019).
- 1850 60. J. A. M. Gronberg, N. E. Spahr, “County-Level Estimates of Nitrogen and  
1851 Phosphorus from Commercial Fertilizer for the Conterminous United States, 1987–  
1852 2006. Scientific Investigations Report 2012-5207” (U.S. Geological Survey, 2012).
- 1853 61. J. M. Gronberg, T. L. Arnold, “County-level estimates of nitrogen and phosphorus  
1854 from animal manure for the conterminous United States, 2007 and 2012” (US  
1855 Geological Survey, 2017).
- 1856 62. D. K. Mueller, J. A. M. Gronberg, “County-Level Estimates of Nitrogen and  
1857 Phosphorus from Animal Manure for the Conterminous United States, 2002: U.S.  
1858 Geological Survey Open-File Report 2013-1065” (2013).
- 1859 63. B. C. Ruddy, D. L. Lorenz, D. K. Mueller, “County-Level Estimates of Nutrient  
1860 Inputs to the Land Surface of the Conterminous United States, 1982–2001: U.S.  
1861 Geological Survey Scientific Investigations Report 2006-5012” (2006).
- 1862 64. R. Mylavarapu, D. Wright, G. Kidder, “UF/IFAS Standardized Fertilization  
1863 Recommendations for Agronomic Crops. SL129.” (University of Florida, Soil and  
1864 Water Science Department, Institute of Food and Agricultural Sciences, 2015).
- 1865 65. C. A. M. Laboski, J. B. Peters, “Nutrient application guidelines for field,  
1866 vegetable, and fruit crops in Wisconsin, A2809 R-11-2012” (University of  
1867 Wisconsin Extension, 2012).
- 1868 66. J. F. Brown, M. S. Pervez, Merging remote sensing data and national agricultural  
1869 statistics to model change in irrigated agriculture. *Agricultural Systems* **127**, 28–40  
1870 (2014).
- 1871 67. J. S. Gerber, *et al.*, Spatially explicit estimates of N<sub>2</sub>O emissions from croplands  
1872 suggest climate mitigation opportunities from improved fertilizer management.  
1873 *Global Change Biology* **22**, 3383–3394 (2016).

- 1874 68. , “IPCC Assessment Report 5: Anthropogenic and Natural Radiative Forcing”  
1875 (Cambridge University Press, 2013).
- 1876 69. S. A. Spawn, T. J. Lark, H. K. Gibbs, Carbon emissions from cropland expansion  
1877 in the United States. *Environmental Research Letters* **14**, 045009 (2019).
- 1878 70. J. Sanderman, Soil carbon profile data from paired land use comparisons (2017)  
1879 <https://doi.org/10.7910/DVN/QQQM8V> (July 9, 2020).
- 1880 71. I. Gelfand, *et al.*, Carbon debt of Conservation Reserve Program (CRP) grasslands  
1881 converted to bioenergy production. *Proceedings of the National Academy of*  
1882 *Sciences* **108**, 13864–13869 (2011).
- 1883 72. C. Poeplau, *et al.*, Temporal dynamics of soil organic carbon after land-use change  
1884 in the temperate zone – carbon response functions as a model approach. *Global*  
1885 *Change Biology* **17**, 2415–2427 (2011).
- 1886 73. U.S. EPA, “Renewable Fuel Standard Program (RFS2) Regulatory Impact  
1887 Analysis” (Office of Transportation and Air Quality, Assessment and Standards  
1888 Division, 2010).
- 1889 74. M. D. Webb, “Reworking Wild Bootstrap Based Inference for Clustered Errors”  
1890 (Queen’s Economics Department Working Paper, 2013) (July 8, 2020).
- 1891 75. Y. Li, R. Miao, M. Khanna, Effects of Ethanol Plant Proximity and Crop Prices on  
1892 Land-Use Change in the United States. *Am J Agric Econ* **101**, 467–491 (2019).
- 1893 76. S. Ahmed, T. Hertel, R. Lubowski, “Calibration of a Land Cover Supply Function  
1894 Using Transition Probabilities” (Center for Global Trade Analysis, Department of  
1895 Agricultural Economics, Purdue University, 2009) (July 14, 2021).
- 1896 77. K. J. Barr, B. A. Babcock, M. A. Carriquiry, A. M. Nassar, L. Harfuch,  
1897 Agricultural Land Elasticities in the United States and Brazil. *Appl Econ Perspect*  
1898 *Policy* **33**, 449–462 (2011).
- 1899 78. N. P. Hendricks, E. Er, Changes in cropland area in the United States and the role  
1900 of CRP. *Food Policy* **75**, 15–23 (2018).
- 1901 79. J. T. Crawford, E. H. Stanley, Controls on methane concentrations and fluxes in  
1902 streams draining human-dominated landscapes. *Ecological Applications* **26**, 1581–  
1903 1591 (2016).
- 1904 80. J. J. Beaulieu, T. DelSontro, J. A. Downing, Eutrophication will increase methane  
1905 emissions from lakes and impoundments during the 21st century. *Nat Commun* **10**,  
1906 1375 (2019).
- 1907 81. Y. Yao, *et al.*, Increased global nitrous oxide emissions from streams and rivers in  
1908 the Anthropocene. *Nat. Clim. Chang.* **10**, 138–142 (2020).

- 1909 82. K. Paustian, *et al.*, Climate-smart soils. *Nature* **532**, 49–57 (2016).
- 1910 83. N. USDA, “2017 Census of Agriculture” (2019) (September 19, 2019).
- 1911 84. T. Wade, R. Claassen, S. Wallander, “Conservation-practice adoption rates vary  
1912 widely by crop and region” (2015).
- 1913 85. D. S. Powlson, *et al.*, Limited potential of no-till agriculture for climate change  
1914 mitigation. *Nature Climate Change* **4**, 678–683 (2014).
- 1915 86. R. T. Conant, M. Easter, K. Paustian, A. Swan, S. Williams, Impacts of periodic  
1916 tillage on soil C stocks: A synthesis. *Soil and Tillage Research* **95**, 1–10 (2007).
- 1917 87. California Air Resources Board, CA-GREET3.0 Supplemental Document and  
1918 Tables of Changes (2018).
- 1919 88. Wang, Michael, *et al.*, *Greenhouse gases, Regulated Emissions, and Energy use in*  
1920 *Technologies Model*® (2020 .Net) (Argonne National Laboratory (ANL),  
1921 Argonne, IL (United States), 2020) [https://doi.org/10.11578/GREET-NET-](https://doi.org/10.11578/GREET-NET-2020/DC.20200913.1)  
1922 [2020/DC.20200913.1](https://doi.org/10.11578/GREET-NET-2020/DC.20200913.1) (July 26, 2021).
- 1923 89. H. Kwon, *et al.*, “Carbon Calculator for Land Use and Land Management Change  
1924 from Biofuels Production (CCLUB)” (Argonne National Lab.(ANL), Argonne, IL  
1925 (United States), 2020).
- 1926 90. M. Wang, *et al.*, “Summary of Expansions and Updates in GREET® 2020”  
1927 (Argonne National Lab.(ANL), Argonne, IL (United States), 2020).
- 1928 91. C. Malins, R. Plevin, R. Edwards, How robust are reductions in modeled estimates  
1929 from GTAP-BIO of the indirect land use change induced by conventional biofuels?  
1930 *Journal of Cleaner Production* **258**, 120716 (2020).
- 1931 92. S. A. Spawn-Lee, *et al.*, Comment on ‘Carbon intensity of corn ethanol in the  
1932 United States: state of the science’ (2021) <https://doi.org/10.32942/osf.io/cxhz5>  
1933 (July 5, 2021).
- 1934 93. T. D. Searchinger, S. Wiersenius, T. Beringer, P. Dumas, Assessing the efficiency  
1935 of changes in land use for mitigating climate change. *Nature* **564**, 249–253 (2018).
- 1936 94. T. Searchinger, R. Edwards, D. Mulligan, R. Heimlich, R. Plevin, Do biofuel  
1937 policies seek to cut emissions by cutting food? *Science* **347**, 1420–1422 (2015).
- 1938
